# Supplementary material for: DUF221 proteins are a family of osmosensitive calcium-permeable cation channels conserved across eukaryotes
Source: PubMed Central journal article supplement — Cell Res. 2014 Feb 7;24(5):632–5. doi: 10.1038/cr.2014.14 (PMC4011337; doi:10.1038/cr.2014.14), 2014-02-07
Supplement: cr201414x1.pdf [file cr201414x1.pdf]

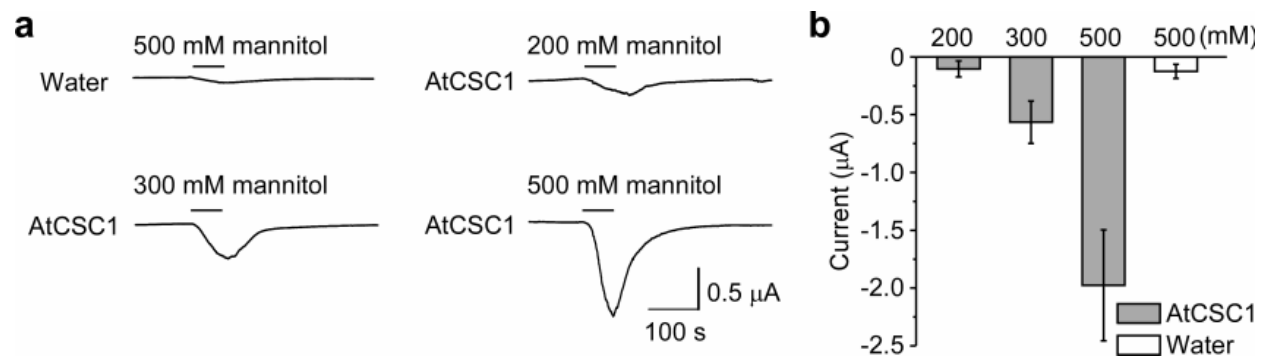

**Supplementary information, Figure S1** Concentration-dependent Activation of AtCSC1 by D-mannitol.

(a) Typical whole-cell current traces recorded from the AtCSC1-expressing oocytes treated with different concentrations of D-mannitol. (b) The current amplitudes evoked by 200 mM, 300 mM and 500 mM D-mannitol ( $n=5$ ). The bars represent means  $\pm$  s.d.
