# Supplementary material for: DUF221 proteins are a family of osmosensitive calcium-permeable cation channels conserved across eukaryotes
Source: PubMed Central journal article supplement — Cell Res. 2014 Feb 7;24(5):632–5. doi: 10.1038/cr.2014.14 (PMC4011337; doi:10.1038/cr.2014.14), 2014-02-07
Supplement: cr201414x2.pdf [file cr201414x2.pdf]

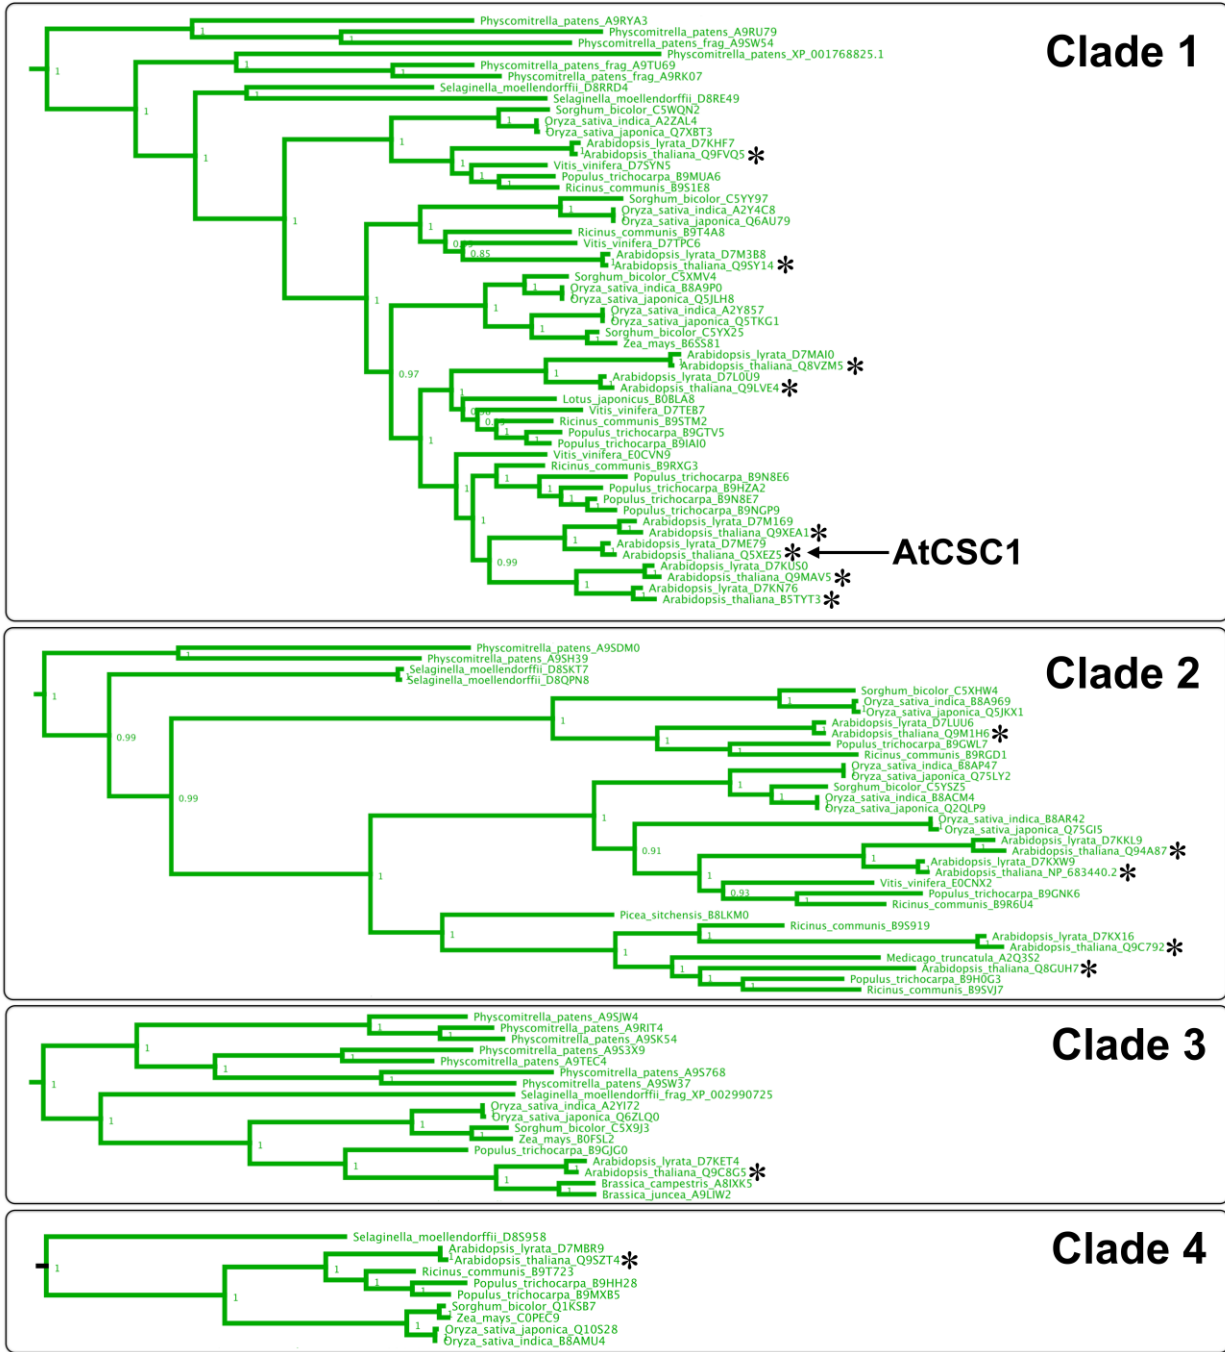

**Supplementary information, Figure S2** ML phylogenetic analysis of DUF221-containing proteins reveals four clades of land plant homologs.

ML phylogenetic analysis of DUF221-containing proteins indicates that AtCSC1 is a member of Clade 1 of DUF221-containing proteins. This clade contains 8 of 15 identified Arabidopsis CSC1 homologs (marked with asterisks).
