# Supplementary material for: DUF221 proteins are a family of osmosensitive calcium-permeable cation channels conserved across eukaryotes
Source: PubMed Central journal article supplement — Cell Res. 2014 Feb 7;24(5):632–5. doi: 10.1038/cr.2014.14 (PMC4011337; doi:10.1038/cr.2014.14), 2014-02-07
Supplement: cr201414x3.pdf [file cr201414x3.pdf]

## **Supplementary information, Data S1 Experimental Procedures**

### ***Oocyte Electrophysiology***

The full-length cDNAs of *AtCSC1*, *HsCSC1* and *ScCSC1* were subcloned into vector pGEMHE<sup>1</sup>. cRNA was synthesized from 1 µg of linearized plasmid DNA template using an mMessage mMachine *in vitro* transcription kit (Ambion, Austin, TX) according to the manufacturer's recommendations. Defolliculated *Xenopus laevis* oocytes were injected with 23 ng and incubated in ND96 at 18 °C for 4 days prior to electrophysiological assays. Oocytes were voltage-clamped at a holding potential of –60 mV using a TEV 200 amplifier (Dagan, Minneapolis, MN) and monitored by computer through a Digidata 1440A/D converter and pCLAMP 10.2 software (Axon Instruments, Foster City, CA). The pipette solution contained 3 M KCl. The oocytes were perfused with a standard ND96 solution containing (in mM) 96 NaCl, 2.0 KCl, 1.0 MgCl<sub>2</sub>, 1.8 CaCl<sub>2</sub> and 10 HEPES, pH 7.5, at room temperature. For cation substitution experiments, 96 mM NaCl was replaced with equal molarity KCl or CaCl<sub>2</sub>. In calcium-free bath solution, 1.8 mM CaCl<sub>2</sub> was replaced with 0.5 mM EGTA. Hyperosmotic stimuli were applied by perfusion with bath solution containing the indicated concentrations of mannitol.

### ***Cell Lines and Ca<sup>2+</sup>-imaging Experiments***

The complete cDNAs of *AtCSC1*, *HsCSC1* and *ScCSC1* were subcloned into eukaryotic expression vector pcDNA3.0 and transfected into CHO-K1 cells using Fugene 6 (Roche Applied Science, Indianapolis, IN). The transfected cells were cultured in DMEM containing 10% FBS (GIBCO, Grand Island, NY) and 1 mg/ml pen-strep (Sigma-Aldrich, St. Louis, MO) in 10% CO<sub>2</sub> and selected with 800 µg/ml G418. Stable clones that expressed the proteins were confirmed by western blot.

Cells were plated on glass-bottom dishes with DMEM culture medium containing 10% FBS (GIBCO, Grand Island, NY) and 1 mg/ml pen-strep (Sigma-Aldrich, St. Louis, MO) in 10% CO<sub>2</sub> and incubated for 48 hours at 37° C. The Ca<sup>2+</sup>-imaging experiments were performed following procedures similar to Liedtke *et al.* (2000)<sup>2</sup>, with minor modifications as described.

After removal of culture medium, cells were loaded with Fura-2 by incubation at room temperature with 10  $\mu$ M Fura-2 acetoxymethyl ester dissolved in isosmotic saline solution, which contains (in mM) 130 NaCl, 2.5 KCl, 2 CaCl<sub>2</sub>, 1 MgCl<sub>2</sub>, 20 D-glucose, 10 HEPES, pH 7.4, and 0.02% pluronic acid (Molecular Probes, Eugene, OR). Following loading with Fura-2, cells were washed four times with saline solution and allowed to recover in 1 mL saline solution for 15 minutes at 37° C. After recovery, cells were imaged at 2-second intervals for 480 seconds in total to monitor cytosolic calcium status. At 120 seconds, hyperosmotic shock was applied by addition of 1 mL saline solution containing 600 mM mannitol (300 mM final mannitol concentration). At 360 seconds, the medium was restored to near-isosmotic conditions by addition of 2 mL H<sub>2</sub>O. The Ca<sup>2+</sup> concentration of all solutions was held constant at 2 mM. Images of Fura-2 loaded cells with the excitation wavelength alternating between 340 nm and 380 nm were captured with a cooled CCD camera. Following subtraction of background fluorescence, the ratio of fluorescence intensity at the two wavelengths was calculated. The ratio of 340/380 nm fluorescence intensity in groups of 10-20 individual cells with the strongest responses were analyzed using MetaFluor (Universal Imaging Corporation). All graphs are the averaged responses from groups of individual cells from representative single experiments.

### ***Mammalian Cell Electrophysiology***

CHO cells were plated onto poly-D-lysine-coated coverslips for recording purposes, and recordings were performed 24 h later. Experiments were carried out at room temperature using whole-cell voltage clamp technique, with an Axopatch 2B amplifier filtered at 5 kHz and pClamp suite of software (Axon Instruments, Foster City, CA). Series-resistant compensation was 80% for all experiments, using 2–5 M $\Omega$  fire-polished pipettes. Pipette solution contained, in mM, 140 CsCl, 1 EGTA, 10 HEPES, 2 MgATP, pH 7.4 (adjusted with CsOH). The isosmotic bath solution contained (mM) 140 NaCl, 5 KCl, 1 MgCl<sub>2</sub>, 2 CaCl<sub>2</sub>, 10 HEPES, 10 glucose, pH 7.4 (adjusted with NaOH). During whole-cell recording, cells were maintained in isosmotic bath solution.



LQGLPFGGVPTVLALDFMCFLLALLFLFSILRKYAWDYG----RLLDADTS-  
 VSSSVNGFCSWLTAIFRIKDDDEIRDKCGGDAVHYLSFQRHIIIGLLVVVGVLSVGVLPVNFSGDLL  
 --AYSFGRTTIANLKSGNNLLWLHTSFAFLYLLLTVYSMRRTSKMRY-----  
 KEDDLVKRTLFLINGISKYAES-  
 EKIKKHFEECTVLEARPCYNVARLMFLDAERKKAERGKLYFTNLQSKENVNPCKPG-H--  
 EQVEAIEYYTKLEQKLKEDYKREKEKV-  
 NEKPLGMAFVTFHNETITAILKDFNVSSSLHNWTVSYAPDPQNIYWEHLSIRGFIWWLRCLVIN  
 VVLFILLFFLTTPAIIITMDKFNV-----  
 KLNNPIITQFFPTLLLWCFSALLPTIVYYSAFFEAHWTRSGENRTTMHKCYTFLIFMVLLPSLGL  
 SSLDLFFRWLEA---  
 AIRFECVFLPDNGAFFVNYVIASAFIGNAMDLLRIPGLLMYIRLCRNVRHQAYEFQFGAAYAW  
 MMCVFTVVMYTSITCPIIVPFGMLYMLLKHLVDRYNLYYAYLPA-  
 KLDKkihsgavnqvvaapilclfwllffstmrtgflaptsmftfvvlvitiviclchvcfghfkyl  
 SANYK---S---SGDEPPL---  
 >Ailuropoda\_melanoleuca\_D2HUR2  
 LQGQPFGGIPTVLLLNIWVVIILAYSFLRKAAWDYG----  
 RLLHNDTSPSDISLKGfyswffntvtmknEDLISKCGDDARIYITFQYHLIIFVLILCIPSLGIILPIN  
 YTGTVL--NSHFGRTTIVNVSIDC-----FSFLYFLLNLVfMAHHCLGFVP-----  
 KRsyKvTRTLmITYVPTDIQDPEIIIKHFHECVVTRVHFcyDVRTLIELDDQRRHAMRGRlyYTAK  
 AKKSGKkVhPCS-R--KEVDAEQYySELEEQLTDEFNAELNRV-  
 RLKRLDLIFVTFQDARMTKHIREDYKYSSVVKRWRVTLAPHPKDIIWKHLSVRRFHWWARFIAN  
 TFLFFLFFLTTPAIIINTMDMYNV-----  
 RLQSPVVTQFFPSLLLWAFTVIMPLIVYLSAFLEAHWTRSSQNLIIVNKCYIFLVFMVILPSMGLT  
 SLDVFFRWLQA---  
 SVRFQCvFLPDNGAFFVNYVITAALLGTGMELLRLGSLFLYSTRLFVHIKSQAMDFQYGREYAW  
 MMNVFSVVVAYSITCPIIVPFGLLYLCMKHVTDRYNMYYSYAPT-  
 KLNEQIHMAAVYQAIFAPLLGLFWMLFFSILRLGLTlHSITFFSLSTLIISMIIAFVSTLLGKLQGVSD  
 EP-----SPARHTY---  
 >Ailuropoda\_melanoleuca\_D2HVN1  
 LQGVTFGGVPTVLLIDVGCFLCLILVFSIIRRRFWDYG----  
 RILEADSSSSSFGQLGCCPWLTAFRLHDDQILEWCGEDAIHYLSFQRHIIIVLLVVVSCLSLCIILP  
 VNLSGDL--PYSFGRTTIANLQTDNDLLWLHTIFAVLYLILTVGFMRHHTQSIRY-----  
 KEESLVRRTLFIITGLPRDTKK-  
 ETVENHFRDCEVLVDVQLCYNVARLLYLCKERKKTEKSLSYTnlRAKTGQNSKPCG-Q--  
 EWEDAVAYYTRLKDRLTERIAEEEECRV-  
 QERPLGMAFVTFQEKSMATYVLKDFNASSELRKWTVAFATYPEDICWKNLSIQGFRWWFQWL  
 GINFTLVGLFFLTTPSIIILSTIDKFNV-----  
 KLNDPIISQFFPTLLLWSFSALLPTIVCYSTLLESHWTRSGENRIMMSKVYIFLIFMVILPSLGLTS  
 LDFFFRWLET---  
 YIRLECVFLPDQGAFFVNYVIASAFIGNGMELLRLPGLVLYTFRMFRNVQNQAFQYEFGAMYA  
 WMLCVFTVIMAYSITCPIIAPFGLVYTLKHMVDRHNLYFAYLPA-  
 KLEKRIHVAAVNQALAAPILCLFWLcFFSFLRLGLKAPLTLFTLLVLLTIVVCVAYTCFGCFKHLs  
 PSYK-----QQQTY---  
 >Ajellomyces\_capsulata\_A6QRK6  
 SAAFQLNAFWASFGTSLGLTIVLALCFsfv--RPRNSLVYAPKIH---  
 DRKHSPPPKGLLAWLTPVIQTKESNLVDCIGLDATVFLRFTRMCRNMFLVLSVIGCLVMIPVNVs  
 QSSS--ISAFATMTPQFVST-R-  
 AMWshVVCLWIFDvvvAYFLWRNYKAVSALRRHYFESSDYQKSLHAKTLLIRHVPPDFRTDDG  
 LLRLVDDSSVPLTSIGRNMKQLPKLIAEHEKTVRQLEEVLAKYFKNPdVKRPTCRPGSDRIDAI  
 YLTARIGDLEAEIKHVRESI-NTVAMPYGFASWESIEAAHFVAYTARNKHP-  
 RGSSITLAPRPNDIIWENLALSRSRKWKRIINFFWSTVLTVLWIAPNALIAVLSNLSNLGKvwpp

FRKELYANKTWAAVQGIAAPAVTSFVYLVLPPIFRRLSIRAGDITKTSRECHVIHSLYAFFVFNNLV  
 VFSIFSAIWTFVATVIEAKNNFFFQVATALCNVSPFWVTWILQRNL-  
 GATLDLLQIFNLTWIWFakraIEWTAPPPFQFASYNNYFLFYATIALCFSTLQPIILPVTALYFALD  
 SWLKKYLLLYVFTKTESGGQFWRVLFNRLVFAVILANFAIALVVKAGTWTMVFCLVPLPFLML  
 AFKWFCKRSFDDSLTYSSRIPT--KK-ASERIASKFGHP  
 >Ajellomyces\_capsulata\_A6QU75  
 NTSNSASGLVSTLIPTLIISGAMVLLFIIL--RQSQRQYAPRTYLGSE-  
 QERTPASGIFGWITSMAKLSDEYVLRHHS�DAYLLRLYKIATTICLVGCFITWPVLPVFNATGG  
 G--G-KQLDILTFGNV--  
 NLNRFYAHTFVAWIFVGFVFFMITREMLFFINLRQAYFLSPLYASRISSKTVLFTSVPQEYLNEAK  
 IRRYIGDDKVKNVWIPTDTKELVDLVEERDETAFRLEAAETKLIKLANSNRPTHKLIGKKVDTINW  
 SRTEIERLNPEIEALQAKHRDAKKISAVFVEFYTQNEAQAAAYQMVAHNQP-  
 LHMAPRIGLNPNDIWWSNLRIKWWELIIRNAATIGAVVTLIIFWAIPVAVVGAININFLTEKVPFLGF  
 INDPCVILGLITSLPALLAVLMALLPIILRLMARLGGCPTTAAAEELRTQNFYFGFQVQVFLVTT  
 LSSAASSVQKVIQKPESAATLLAQNIPKASNFYIAYFILQGLTFSAGALLQIAGLIVSKILGTMYK  
 WSTLSGLGWGTVLPVLTNLCVIAITYGAIAPLVLGFATIGLFLFYVAYRYNMLYVTNSNIDTKGMI  
 YPRALQQTAVGCYLLILCLVGLFAISTALGPLILMIVFLVFVVIYHVSLNAAVTPALLEYLPRNLEAEE  
 -SYTPEVEQNAYFHP  
 >Ajellomyces\_capsulata\_C0NQE5  
 DVSTSATALLTTFVPAFILFTLWTLVFIIC--RRSQRFYAPRSYLGNE-  
 HERSPESGWINWIGAFFNLSDTYVLQHSSLDGYFFLRFLRLMSVTCFVGCLVWVWPILPPIHATG  
 GA--G-TQLDALSFSNV---  
 PNRYAHVLVAVWMFFSFIFYMVTREGMFYATLRQAYFLSPLYASRISSRTVLFMAVPKALLTGS  
 KMTKVFG-  
 KSIRRIWITTDCKKLDELVQRRDKLALRLERLETDLIKSANVKRPTHRLTGKKVDSIEWLRSELEK  
 VLPEVEKQLQKKHRGAKPIPAVFIEFDSQASQAQTAYQMLSHHQ-  
 FQMTPRIGITPQQIWPALQYSWWSRIVRKFLAQAAITALIIFWSIPSAFVGMISNVAYLSNLLPFL  
 SFINKLPVIQGVISGLLPVGLALLMSLVPVLLRFLARQTGLPTTVHVELFTQNAHFQVQVFL  
 VTTLTSASAATSQIIKDPMSVKDLLAKNLPKASNFYISYFLLQGLVLSAGAVVQVVGFLIFKIFVA  
 LYEWTSMNGLRWATVFPVFTNMVIAITYSCIAPLILGFSSFGLYLVYQAYRYNLLFVYDSDVDT  
 KGLIYPRALQQVLTGVYLSVCMIGLFAIKGAIGPVIMMVLFIILMILAHISLNDALRPLLSALPRTL  
 EQAE-EYSDEVADNAYYPP  
 >Anolis\_carolinensis\_XP\_003214481.1  
 LQGLPFGGIPTVLSLNFIVWMILLIFSCLRKAAWDYG----RLLDNDS--  
 EHSPQVGFCSWLVSIIYQMKDEEIQSKCGIDATTYLSFQRHVLVLLTIICVLSVAVILPVNFSGDLL-  
 -PSNFGRTTIVNPKEDRLLWLHSIFALLYFIITVLCMAHHSIQLDY-----  
 KEHEKVARTLMVTKIPKEITDPSLVIKHFHECTVTSVQFCFDVHKLMKLDKSKRRKAMKGRLYFTT  
 KAQKEGKRIHPCS-R--EEVDAEQYYGELEEKLTDEFNAERSRI-  
 ALKRLDMAFVTFQDERMTATILKDYNQSSVVKSWGVSYPSPNDIIWENLSVHGASWWVRFIL  
 LNICLFILLFLLTPAIIVNTIDLFNVT-----  
 RLQNPVVTQFLPTLLWGFVLLPFIVYYSAYLESHWTRSNNKQITMHKCYFFLVFMVILPSLGL  
 TSLDLFFRWLHA---  
 DIRFQCVFLPDNGAFFVNYVITTSLIGTAMALMRIPGLVVYATRICALHIRNQAYDFQFGLEYAWIC  
 CVFAVVMYTSITCPIIVPFGLLYMMMLKHMVDRYNIYYVYLPT-  
 KLNQHIHLAAVSQMVMAPMLCMFSLFFSILRLGYSHPIFTCVVLLCCIFSSIFGLCFRKLHPRK  
 PSYQ-----SPAHSY---  
 >Anolis\_carolinensis\_XP\_003215953.1  
 LQGLPFGGVPTVLALDFMCFLLALLFVFSILRKVAWDYG----RLLDADTS-  
 VSSSVNGFCSWLTAIFRIKDEIRDKCGADAVHYLSFQRHIIIGLLVAVGVLSVGIVLPVNFSGDLL  
 --PYSFGRTTIANLNSGNLLWLHTSFAFLYLLLVYSMRRHTSKMRY-----  
 KEDDLVKRTLFINISKYAEP-

EKIKKHFEECTVLEARPCYDVARLMFLDAERKKAERGKIYFTNLQSKENTNPKPCG-H--  
EEVEAIEYYTKLEEKLKEDYKKEKEKV-  
NEKPLGMAFVTFHNEAITAILKDFNVSSSLHNWTVSYAPDPQNIYWEHLSIRGFIWWFRCLIINV  
VLFILLFLLTPAIIITMDKFNVT-----  
KLNNPIITQFFPTLLLWCFSALLPTIVYYSAFFEAHWTRSGENRTTMHKCYTFLIFMVLLLPSLGL  
SSLDVFFRWLEA---  
AVRFECVFLPDNGAFFVNYVIASAFIGNAMDLLRIPGLLMYMIRLCRNVRHQAYEFQFGAAYAW  
MMCVFTVVMYTSITCPIIVPFGLMYMLLKHLVDRYNLYYAYLPA-  
KLDKKIHS GAVNQVVAAPILCLFWLLFFSTVRTGFLALTSMTFVVLVITIVICLCHVCFGHFKYLS  
ANYK-----VAESEE---  
>Anolis\_carolinensis\_XP\_003216139.1  
LQGVTFGGIPTVLLLDVTCFLMLMLIFSFIRRRFWDYG----RILEADSV-  
SSSIPEGFCSWMASAFRMHEEEINEKCGNDAITYLAFQRHLICLLVVVSMLSCLIPVNLSGNLL  
--PYSFGRTTIANLKTGDNLLWLHTIFAVVYLITVVMKHHTSSIKY-----  
KDESVVKRTLFIPTNAKT-  
TLIENHFLSCHVQEVQLCYDVSKLTYLYQERKQAEKSVDYTTQMFLRFGKHTKPCG-Q--  
EKEDAVEYYTRVSDKYLEEYMKEKEII-  
YNKPLGMAFVTFLEKSMATHVIKDFNASAELCRWNVTYATYPEDICWSNLSVRGIRWWFWCL  
CINLLLFLVLFLLTPSIIITMDKFNVT-----  
KLNNPVVSQFFPTVLLWSFSALLPTIVYYSTIFESHWTRSGENRIMMHKVYIFLIFMVLLPSLGLT  
SLDFFFRWVES---  
RIRLECVFLPDQGAFFVNYVIASSFIGNGMELLRLPGLMLYTIIRMIKNVQQQAYQFEFGAMYAG  
TLCVFSVIMAYSITCPIIVPGLIYMLLKHTVDRHNLYYAFLPA-  
KLERELHVAAVNQALAAPILCLFWLYFFSFLRLGFKAPTTLFTFLVLGIAIACLGYTCFNCLKFLS  
PNYK-----RMDQRY---  
>Anopheles\_gambiae\_Q7Q7M1  
ILINLYEGIPETLLLNVIWFFLILLFTLLRQQAWDYG----RLLSHG-----  
RGCFSWIVATFRLTKEQILTHSGPDAVHYLSFQRHLIVVMGIMTVISIAIILPINFSGTLS--  
KNSFGHTTISNLEPDSPSMWAHVFAIAYVPMVVLIMRRASGRNAF-----  
KTAPTTRTIMATNISQGDCKTIIRTYLQQVTIEDIQLAYNISSLIKAAEEYERTVEARIYCEAHRNR  
D--QAQPSC----EKVDALEYKDHVQLAGEVARMRASA-  
LNEPLGIAFVTLNSAHEAQHVMLHFK---  
PGTEWNL SFAPAPSDIFWENLNIDTAQWYCKWATVNFALFLFLFFLTPVIIVNQLDTLSLT-----  
-----  
KKISPLVSEFLPTLLLWLSLALMPVIVAYSDTWLSHWTRSRQNYLIMTKTFGYLLFMILILPSLGLT  
SAQALLQWTND---  
TYRWECIFLPDKGAFFVNYIITAAFIGTALELIRFPDLICYLWKLAPYIKSILITFPFGIHYAWMVMV  
FTTSTVYSLACPLIMPFAMVYITLKHVVDKHNLF AFAPSNGSGGKIHSTAVTMTKFSVLLLLIIM  
AALAVVRTGQVELRAVVLILALCATLVMFA-----CMSPKRC-----PSHLSY---  
>Arabidopsis\_lyrata\_D7KET4  
----EFGSFLVSLGTSFVVFVVLMLLFTWLSRKSNGNAPIYYPNRILKG-----  
RNPFAWMREALTSSEQDVVNLSGVDTAVHFVFLTTVLGIFACSGLLLLPTLLPLAATDHNLKNF  
SQLDNLSMANITKSPRLWAF LGAVYWISLVTYFFLWKAYKHVSTLRAQALMSAA--  
VKPEQFAILVRDMPSGQTQKEFIDSYFREETFYRSLVATENSKVNKIWGKLEGYKKKLARAEAIL  
AATNN--RPTNKTGKQVDSIEYYTELINE SVANLETEQKAVLKQ--  
QTAAVVFFTRVAAAASAAQSLHCQMV-  
DKWTVTEAPEPRQLLWQNLNIKLF SRIIRQYFIYFFVALTILFYMPIAFVSAITTLLENLQKIIPFIKPV  
VEITAIRTVLESFLPQIALLVFLAMLPKLLLFLSKAEGIPSQSHAIRAASGKYFYFSVFNVFIGVTLA  
GTLFNTVKDIAKNPKMIINLLATSLPKSATFFLTYVALKFFIGYGLELSRIIPLIIFHLKKKVKAWYYP  
GDLYATRVPGDLLVLTITFCYSVIAPLILIFGIIYFGLGWLVLNRNQALKVYVPSYESYGRMWPPIH

QRILAAFLFQVVMFGYLGAKTFFYT-ALVIPLIITSLIFGYVCRQKFYGGFKHTALEVA-CR-----  
EIFRAYIPH  
>Arabidopsis\_lyrata\_D7KHF7  
---ATLQDIGVSALINLFGAFLFLIAFAVLRIQPINDRVYFPKWYLTG--  
ERNSPRFTFLNWMPQAMKMSESEIIRHAGLDSAIFLRIYTLGLKIFAPVMVLALVVLVPVNVSSG  
TLFFVSNIDKLSISNVQPKSSKFFFHIGVEYIFTFWACFMLYREYNNVAIMRLQYLASQR--  
RRPEQFTVVVRNVPDH-  
SVPDVTVDQFFKTEHYLCHQAVYNANTYAKLVKQRAKLQRWFDYVVLKHQRNPHK-  
QPTCRTWGKKVDSIEYYKQKIKEFDHNMSLERQKVL SKLMLPVAFVSFDSRWGAAVCAQTQQ  
SKNP-  
TLWLTSSAPEPRDIYWQNLAIPFISLTIRKLVIGVSVFALVFFYMPIAFVQSLANLEGLERVAPFL  
RPVTRLDFIKSFLQGFLPGLALKIFLWILPSVLLIMSKIEGYIALSTLERRAAKYYYFMLVNVFLG  
SIIAGTAFEQLHSFLQSPTQIPRTIGVSI PMKATFFITYIMVDGWAGIAGEILRLKPLVIFHLKNMRV  
RAMDPGFVDFKETLPSLQLYFLLGIVYTAVTPILLPFICIFFAFAYFVYRHQIINVYNQQYESCGAF  
WPHVHGRIIASLLISQLLLMGLLASKKAADSTPLLIILPILTSFHKYCKHRFEPAFRQYPLEEAMA  
KELNMKADLADAYLHP  
>Arabidopsis\_lyrata\_D7KKL9  
----DVSSLLTSAGINIGTCVVLVSLYSILRKQPANYCVYFGRLLSD-G-RVK---  
APSPSWLVKAWETTEDEMLASAGLDAVVFIRMVICSIRIFSIVAVVCI AFVLPVNYGQKT--  
LESLVIFTIENLNQRSRWLWVHCLALYIISSAACALLYFEYKNIKRRLAHITGSA--  
SKQSHFTVLIRAIQQ-SYSETVSKYFTNPSYVSHLMVYRDGFIHRLMNETDRMCQAIKHVSP---  
DL----SCNPSLCGAATNSFQILSNETDSVKG--QLGELTLTEE-  
ERPVAFVFFKSRDALVVSEVLQTPNP-  
MLWVADLAPEPHDVHWRNLRIPYRQLWMRRIATLVGAVAFMFVFLFPVAFVQGLTQLQTL SKN  
FPFLRDLLHKGFMKQVITGYLPSVILVLFYAVPPLMMYFSTLEGCVSRSLRKKKSACIKILYFTIW  
NVFFVNILSGSVIRQLSVLS-  
SVRDIPAQLAKVVAQVGVFFMTYCFTSGWAGLACEIMQPVGLIWNLI AKVSYETL---  
RFPYHTEIPRLLL FLLGFTNSVIAPLILPFLLIYFFFAYLIYKNQIINVYITKYESGGQYWPVFHNTT  
IFSLILSQIIALGFFGLKLSTVASGFTIPLIFLTLFSEYCRQRFAPIFKKYP AEILIAMMEEIHNNLKA  
AYSQI  
>Arabidopsis\_lyrata\_D7KN76  
---ATLEDIGVAATINILTAIFLLAFAILRIQPFNDRVYFPKWYLKG--  
IRSSPLL RFLNWMPAALNMPEPELIDHAGLDSAVYLRIYLIGLKIFVPIALLAWSILVPVNWTS DGL  
QLSSDIDKLSISNIERGSDRFWTHLMAYAFTFWTCYVLMKEYEKVAAMRLAFLQNEQ--  
RRPDQFTVLVRNVP AE-  
SISESVEHFFLVDHYLTHQVVYNANDLAALVEQKKSTQNWLDYYQLKYTRNQE H-  
KPRIKTWGQKVD AIDHYIAEIEKLNEQ---  
ERKKVKDTSVMPAAFVSFKTRWGAAVCAQTQQSSDP-  
TEWLTEWAP EAREVFWSNLAIPYVSLTVRRLIMHIAFFFLTFFFMIPIAFVQSLASIEGIEKSAPFL  
KSIIEKKLVKSVIQGFLPGIVLKLFLIFLPSILMVMSKFEGFVSLSSLERRAASRYIYFNLVNVFLGSI  
IAGSAFEQLESFLQSAKEIPKTVGVAIPIKATFFITYIMVDGWAGIAGEILRLKPLIFFHIKNFREEA  
MNPQGQINYHATEPRIQLYFLLGLVYAPVTPVLLPFIIIFALAYLVFRHQIINVYNQEYESAARFWP  
DVHGRIISALIISQILLMGLLSTKGAAQSTPFLLVLPILTFFFHRFCKGRYEP AFLRHPLKEAMVKN  
FNLKPYLQKAYIHP  
>Arabidopsis\_lyrata\_D7KUS0  
---ATLADIGVAAAINILSALIFLLLFAILRIQPFNDRVYFPKWYLKG--  
VRSSPVV RFLNWMPAALKMPEPELIDHAGLDSAVYLRIYLIGLKIFVPIALLSWSILVPVNWTS DGL  
LQLSSNIDKLSISNVERGSDRFWAHLVMAYAFTFWTCYVLMKEYEKIAAMRLSFLQSEK--  
RRADQFTVLVRNVPPE-  
SIRENVQHFFLVDHYLTHQVVYNANELAKLVEEKKKMQNWL DYYQLKYTRNKEQ-  
RPRVKLWGKKVDAMDHYTAEIEKLSEQIMEERKRKIDKSVMPAAFVSFKTRWGAAVCAQTQQ

TKNP-

TEWLTEWAPEAREMYWENLAMPYVSLTVRRFVMHIAFFFLTFFFIIPIAFVQSLASIEGIQKSAPF  
LSPIVEKKFMKSLIQGFLPGIVLKLFLIFLPTILMIMSKFEGFISISSLERRAAFRYYIFNLVNVFLGSI  
ITGSAFEQLDSFLQSANDIPRTVGVAIPIKATFFITYIMVDGWAGVAGEIFRLKPLVIFHLKNFREE  
AMDPGQIDFYATEPRIQLYFLLGLVYAPVTPVLLPFIIFFFGFAYLVFRHQIINVYDQKYESAAAF  
WPDVHGRIISALISQILLGLMSTKKGKQSTPFLVLVAIVTFGFHRFCKGRYESAFVINPLQEAMI  
KNLNLKGFLQNAYIHP

>Arabidopsis\_lyrata\_D7KX16

----LLSALLMSVGINSCLCVLFILYSVLRKQPRNYEVFLPRRLAD-G-TSKR--  
IPSVKWIWKSWRPTEKELMESSGLDGVVFMRMITFSLKVFFFAGIIGVFVLLPVNCFGDQLTVA  
NSLDLFSVANLKIRSQWLWVHFGAIYLVTAFCCLLYFEFRYIALKRIEHFYSSK--  
PQPEQFTILVRNIPSS-  
SVSDTVDRFFGESTYLSHVVIHRTSKLRSVVDKAKKLYKQVKHKKPVKKKP-----  
FSRRDTPEGHYENVLQEMEQNIRLQGAEVSGK-EVRAAFVSFKSRYGAATALHMPQSINP-  
TYWLTEPAPEPHDVHWPFFSASFQMQLAKILVVFACLLLTILFLVPVVLVQGLTNLPALEFMFP  
FLTLILSMKVVSQIITGYLPSLILQTSKLVVPPIMEFLSSIQGHICHSDIQKSACNKVIWFTIWNVFF  
ATVFSGSAFYKLSVVL-  
DPKEIPVKLAVAVPAQASFFIAYVVTGWTDTLTELFRVVPFMVSYIKRSEFVVP---  
PMRYHRDTPRVLFFGLLGITYFFLAPLILPFIIFYFLAYIIRNQMNVYAPKFDTGGMFWPMIH  
YTMIFSLVLMHAIAGLFALKKMELATYLLVPLPVCTLLFNEFCRKRFPMPIFTAYPAEVLTKRMPE  
FYNNLVSAYQDP

>Arabidopsis\_lyrata\_D7KXW9

----EISALLTSAGINISICIVLLSLYSILRKQPSNYCVYFGRRLVC-G-GAR---  
VPSPSWLVKAWETSEDELLAAAGLDAVFLRMVLF SIRIFFIVAVICIAFVLPVNYGQPM--  
LESSEVFTIENLKEGSKWLWVHCLALYIITSAACLLLYFEYRTIAKMRLGHITGCA--  
SKPSQFTVLIRAIWQ-SYSDTLKFFTNSSYVSHQMVMYHNGIIRLLREAERMCQTLKHVSP---  
EI---NCKPSLCGTATNSFHILSNEADSVKG-MELGELTMTEQ-  
ERPAAFVFFKTRYDALVVSEVLQSSNP-  
MLWVTDLAPEPHDVYWKLNIPYRQLWIRKIATLVGAVAFMFVFLIPVTFIQGLTQLEQLSHAFP  
FLRGILRKQFISQVITGYLPSVILILFFYAVPLMMYFSALEGCSIRSIRKKSACIKVLYFTIWNVFF  
VNILSGSVIRQLNVFS-  
SVRDIPAQLARSVPTQAGFFMTYCFTSGWASLACEIMQPMALIWNLVAKVSYETL---  
RFPYHTEIPRLLLFGLLGFTNSVIAPLILPFLLIYFFLAYLIYKNQILNVYITKYESGGQYWPIFHNTT  
IFSLILTQIIALGFFGLKLSTVASGFTIPLILLTLLFSEYCRQRFAPIFNKNPAQVLIDMMEELHKKLH  
NVYSQI

>Arabidopsis\_lyrata\_D7L0U9

---ATLNDIGVAAAAILTAFAFFIAFAILRLQPVNDRVYFPKWYLKG--  
LRSSPIIRFLNWMPQALRMPEPELIDHAGLDSVVYLRIYLLGLKIFFPIACIAFTVMVPVNWTNSTL  
DQFSDIDKLSISNIPTGSSRFVHLCMAYVITFWTCFVLQREYKNIGSMRLQFLASEQ--  
RRPDQFTVLVRNIPPE-  
SVSELVEHFFKVDYYLTYQAVYNANKLSELVQKRKQLQNWLDYYQNKHSRNP TK-  
RPLIKIWGEEVDAIDHYIEKIEGLTRKISEEKETVMTKSLVPAAFVSFKRRWGAVVCSQTQQSRN  
P-  
TEWLTEWAPEPRDIYWDNLALPYVQLTIRRLVIAVAFFFLTFFFMIPIAFVQTLANIEGIEKAVPFL  
KPLIEVKTVKSFIQGFPLGIALKIFLIVLPSILMLMSKFEGFISKSSLERRCASRYMFMQFINVFLCSI  
IAGTALQQLNSFLQSATEIPKTIGVSIPMKATFFITYIMVDGWAGVAGEILRLKPLIYHLKNFREEA  
MDPGTIGFNTGEPQIQLYFILGLVYAAVSPILLFILVFFALAYVVYRHQVINVYNQEYESAAAFW  
PDVHRRVVIALIVSQQLLMGLLSTKRAARSTPLLFILPVLITGFHKFCQGRYQPIFVRYPLQDAMV  
KNLNLKTFLQNAYAHP

>Arabidopsis\_lyrata\_D7LUU6



---TPESLLASASINIGLAVVALWLFSVLKKQPRNAV VYYARRLS-D-R-  
HHHRPLLPSVAWIPRAFRVPEDEILSRHGLDALVLIRLFKFGIRFFLLCSLLGASLLLPVDYYNES-  
--EYSMDAFTISNITRGSNKLWVHFSCSLWFISFYALFLLHKEYKEILVIRLQQMKELR--  
HRADQFTVLRVQVPLHNTRGCTVDHFFSKFSYHSHQMLYDGRDLEYLLGKQKLLKKEIEYKR--  
-----HIGSQEHKHISTSEEKLEITHMVYHLQSETMEK-  
ELPVAFVTFKSRRNAALAAQTQQHSNP-  
LELITEMAPEPRDVSWRNLAIPQKILPLNKIGVILAAALLTIFFAIPVTAVQGGIAKYEKLLKWFPPAM  
AIEFIPGLSSVVTGYLPSAILKGFMYIIPFAMLGLAYLGGSSIFKSNEEIKACNMVFYFLMGNVFFLS  
LISGSLLEIGEYLTHPRDIPSHLAAAVSAQAEFFMTYILTDGLSGFSLEILQLGLLFDIIRSYPYL  
F---  
SFPYFRVIPTVSLSIMIGMIYAVVAPLMLPFLVGYFCLGYIVYFNQMEDVYETTYDTCGRFWPFIH  
HYIFVSIILMQITMVGLFGLKSKPSAAIATVPLILITIAYNEYCKIRFLPSFKHFPIQTAVDIMETHCV  
DAASAYHQP

>Arabidopsis\_lyrata\_D7M169

---ATLQDIGVSAGINILTAFFIIFAFRLRQPFNDRVYFSKWYLKG--  
LRSSPALKFLHWMPEALKMPERELIDHAGLDSVVYLRIYWLGLKIFAPIAMLAWAILVPVNWTNN  
ELELSSDIDKLTISNIPESSHRFWAHIVMAYAFTIWTTCYMLMKEYETVANMRLQFVASEA--  
RRPDQFTVLRNVPE-  
TVSELVEHFFLVDNYLTHQVVYNANKLADLVGKKKKLQNWLDYYQLKYTRNNSQTRPITKLCG  
QKVDAIEHYIAEVDKTSKEIAEERENVVQKSIMPASFVFSKTRWAAAVCAQTTQTRNP-  
TEWLTEWAAEPCDVYWPNLAIPIVSLTVRNLVMNVAFFFLTFFFIPIAFVQSLATVEGIEKVAPF  
LKVIIEDKFVKSIIQGLLAGIVLKLFLIFLPGILMTMSKFEGFTSVSSLERRSASRYIFNLVNVFLG  
NVIAGAAFEQLNSFLQSPNQIPKTIGMAIPMKATFFITYIMVDGWAGVAGEILMLKPLIYHLKNAR  
EEAMNPGSIGFNTGEPQIQLYFLLGLVYAPVTPMLLPFILIFFALAYVYRHQIINVYNQEYESAA  
AFWPDVHGRVITALIISQLLLMGLLGTKHAAFAAPFLIALPVITIGFHRFCKGRYEPAFIRYPLQEA  
MMKNLNLKGYLQDAYIHP

>Arabidopsis\_lyrata\_D7M3B8

---ASVQDIGLSAAILLSAFAFLFAFAMLRLQPVNDRVYFPKWYLKG--  
IRGSPTVKFLNWMPEALKMPEPELIEHAGLDSAVYIRIYLLGLKMFVPITLLAFGVLVPVNWTGET  
LENFSNVDKLSISNVPPGSPRFWAHITMTYVFTLWTCYILYMEYKTVANMRLRHLAAES--  
RRPDQLTVLRNVPE-  
SVNEHVEHFFCVDHYLCHQVVYNANDLAKLVAQRKAMQNWLTYYENKFERK PSS-  
RPTTKTWGTTVDAIDFYTSKMDILARQEAVEREKIMPKSIMPAAFVSFRSRWGTAVCAQTQQC  
HNP-  
TIWLTEWAAEPRDVFWDNLAIPIVELSIRRLTTVALFFLIFCFMIPIAFVQSLANLEGIQKVL PFL  
KPVIEMKTVKSVIQGFLPGIALKIFLILPTILMTMSQIEGYTSLSYLDRRSAEKYFWFIIVNVFLGSII  
TGTAFFQQLKSFLQPTEIPKTVGVSIPMKATFFITYIMVDGWAGIAAEILRVVPLVIFHLKNTRQQ  
AMDPGHLD FATSEPRIQFYFLLGLVYAAVAPILLPFIIVFFAFAYVFRHQVINVDQKYESGARY  
WPDVHRRLLIICLIISQLLMMGLLSTKKFAKVTALLLPQPILTFWFYRYCAGRFESAFSKFPLQEAM  
VKNLNLKEYLKEAYVHP

>Arabidopsis\_lyrata\_D7MAI0

---ATINDIGVAAAINIVTALAFLLAFAIFRIQPVNDRVYFPKWYLKG--  
LRSSSIIRFLNWMPEALKMPEPELVDHAGLDSVVYLRIYLLGLKIFFPIACVAFTAMVPVNWTNK  
GLDRFSDIDKLSLSNIPNGSPRFVHLCMAYAITFWTCFILKREYQNIALMRLQFLANDQ--  
RRPNQFTVLRNIPSE-  
SICELVEHFFKVDHYLTFQAVHDATKLSLVLTRKMQMQLLDYNINKHMRNQSN-  
RPVIKMCGEEDGIIKYTSVVEGLTREIAEEKQRLRRTKSIVPAAFVSFKSRWGA AVCAQTQQTR  
NP-  
TEWLTEWAAEPRDIYYDNLALPYVDL KIRRLIVGVAYFFL TFFFMIPIAFVQSLANIEGIEKAFPFL  
KPLIEVKLLKSIIQGFLPGIALKIFLLFLPRILMQMSKFEGFVSTSSLERRAATRFYMFQFINVFLGS  
IVTGTAFFQQLNSFLQSANDIPKTIGVSIPMKATFFITYIMVDGWAGVAGEILRLKPLIYHLKNSRE

EATDPGTIGFNTGEPQIQLYFLLGLVYAAVSPILLPFILVFFGLAFVVYRHQVINVYNQKYESAGK  
FWPDVHRRVVTALVVSQLLLMGLLSTKHASKSTPFLLVPLLTIGFHMHCKNRYQPAFVTYPLQ  
EAMIKNFNLKAFLRDAYAHP

>Arabidopsis\_lyrata\_D7MBR9

IPDAWYGNIQYLLNISVIGLLCCVSIFLVKLRSDHRR-----  
SALFSKLLAVWKATCREIARHCGADAAQFLLIEGGSFVLLFSIAVLAVSVMLPLNLYAGTA--  
SDELSKTMITHIQKGSALLWLHFVVFVIVVVISHFGIAAIEARLKFTRFRD-----  
NANSTAVFTIMVQGLPKNLGSDRVFEECFRLGKVYKIIVPMDLCALDDLATELVRVRDEITWLVA  
KMDSRLL-----DEKLRKLQELRADLESQLAAYKEG--  
RAQGAGVAFVMFKDVYTANKAVQDFRESVRLQQWKVDRAPLATDIYWNHLGLTKVALIVRRVI  
VNTILLILVFFSSPLALISALVSAGRIFSAQSWLAWVQTS-  
WIGSLIFQFLPNVFIFVSIYIVPSALSYSKFERHLTVSGEQRAALLKMVCFVLNLIILKALVSSL  
ESASCYLDGDR-  
IEYMSPSFLSRSCVSALAFLITSTFLGISFDLLAPIWIKKKIQKFSRTPPKQKFDFAQYYAFNLTI  
FALTMIYSSFAPLVVPGAVYFGYRYIVDKYNFLYVYRVRGGNEGKLMDTVLCIMRFCVDLYLV  
SMLLFFSVKGDSTKLQAIFTLGLVLMY--KLLTDRYHPALRSIQTDSI-----IDGPVDYEAYSHP

>Arabidopsis\_lyrata\_D7ME79

---ATLQDIGVSAGINILSAFVFFIIFAILRLQPFNDRVYFSKWYLKG--  
LRSSPAMRFLNWMPEALKMPEPELIDHAGLDSVVYLRIYWLGLKIFAPIAVLAWAVLVPNWNTN  
NTLEMSSDIDKLSVSNIPYEYSMRFWTHIVMAYAFTIWTWCYVLMKEYETIANMRLQFVASEA--  
RRPDQFTVLVRNVPPE-  
SVSELVEHFFLVDHYLTHQVVCNANKLADLVKKKKKLQNWLDYYQLKYARKNSQ-  
RIMVKLWGQKVDAIEHYIAEIDKISKEISKEREEVVPKSImpAAFVSFKTRWAAAVCAQTQQTRN  
P-

TQWLTEWAPEPRDVFWSNLAIPYVSLTVRRLIMHVAFFFLTFFFIIPIAFVQSLATIEGIVKAAPFL  
KVIVEDQFMKSVIQGFLPGIALKIFLAFLPSILMVMSKFEGFTSISSLERRAAFRYYIFNLVNVFLA  
SVITGAAFEQLNSFLQSPNQIPKTIGVAIPMKATFFITYIMVDGWAGVAGEILMLKPLIMFHLKNA  
REEAMDPGSGFNTGEPRIQLYFLLGLVYAPVTPMLLPFILVFFALAYIVYRHQIINVYNQEYESA  
AAFWDVHGRVIAALVISQLLLMGLLGTKHAALAAPFLIALPVLITIGFHHFCKGRYEPAFIRYPLQ  
EAMMKNLNLKGYLQNAIHP

>Arabidopsis\_thaliana\_B5TYT3

---ATLGDIGVAAAINILTAIFLLAFAILRIQPFNDRVYFVKWYLKG--  
IRSSPLLRFNWMPPAALKMPEPELIDHAGLDSAVYLRIYLIGLKIFVPIALLAWSILVPVNWTSGL  
QLSSDIDKLSISNIENGSDRFWTHLMAYAFTFWTCYVLMKEYEKVAAMRLAFLQNEQ--  
RRPDQFTVLVRNVPPE-  
SISDSVEHFFLVDHYLTHQVVYNANDLAALVEQKKSTQNWLDYYQLKYTRNQEH-  
KPRIKTWGKKVDAIDHYIAEIEKLNQIMEERKKVKDTSVMPAAFVSFKTRWGAAVSAQTQQSS  
DP-

TEWLTEWAPEAREVFWSNLAIPYVSLTVRRLIMHIAFFFLTFFFMIPIAFVQSLASIEGIEKNAPFL  
KSIIENDLFSKSVIQGFLPGIVLKLFLIFLPSILMVMSKFEGFVSLSSLERRAAFRYYIFNLINVFLGVS  
ITGSAFEQLDSFLQSAKEIPKTVGVAIPIKATFFITYIMVDGWAGIAGEILRLKPLIFFHIKNSREEA  
MNPQINYNHATEPRIQLYFLLGLVYAPVTPVLLPFIIIFALAYLVFRHQIINVYNQEYESAARFWP  
DVHGRISALIAQILLMGLLSTKGAAQSTPFLLFLPIITFFFHRYCKGRYEPAFLRHPLKEAMVKNF  
NLKPYLQKAYIHP

>Arabidopsis\_thaliana\_NP\_683440.2

----EISALLTSAGINISICIVLLSLSYILRKQPANYCVYFGRRLVC-G-GAR---  
VPSPSWLVKAWETSEDELLAAAGLDAVFLRMVIFSIRIFFIVAVICIAFVLPVNYGQPM--  
LESSEVFTIENLKEGSKWLWVHCLALYIITSAACLLYFEYSTIAKMRLGHITGCA--  
SKPSQFTVLIRAIWPQ-SYSDTLSKFFTNSSYVSHQMVMYHNGIIRLLRDAERMCQTLKHVSP---  
EI----NCKPSLCGTATSSFHILSNEADSVKG-MELGELTMTEQ-  
ERSAAFVFFKTRYDALVVSEVLQSSNP-

MLWVTDLAPEPHDVYWKLNIPYRQLWIRKIATLVGAVAFMFVFLIPVTFIQGLTQLVQLSHAFP  
 FLRGILSKNFQVITGYLPSVILILFFYAVPPLMMYFSALEGCISRSIRKKSACIKVLYFTIWNVVF  
 VNILSGSVIRQLNVFS-  
 SVRDIPAQLARAVPTQAGFFMTYCFTSGWASLACEIMQPMALIWNLVAKVSYETL---  
 RFPYHTEIPRLLLFGLLGFNTSVIAPLILPFLLIYFFLAYLIYKNQILNVYITKYESGGQYWPIFHNTT  
 IFSLILTQIIALGFFGLKLSTVASGFTIPLILLTLFSEYCRQRFAPIFNKNPAQVLIDMMEELHKKLH  
 NVYSQI  
 >Arabidopsis\_thaliana\_Q5XEZ5  
 ---ATLQDIGVSAGINILSAFVFFIIFAVLRLQPFNDRVYFSKWYLKG--  
 LRSSPAMKFLNWMPEALKMPEPELIDHAGLDSVVYLRIYWLGLKIFTPIAVLAWAVLVPVNWNTN  
 NTLEMSSDIDKLSVSNIPPEYSMRFWTHIVMAYAFIWTWCYVLMKEYETIANMRLQFVASEA--  
 RRPDQFTVLVRNPPE-  
 SVSELVEHFFLVDHYLTHQVVCNANKLADLVKKKKKLQNWLDYYQLKYARNNSQ-  
 RIMVKLWGQKVDAIEHYIAEIDKISKEISKEREEVVPKAIMPAAFVSFKTRWAAAVCAQTQQTRN  
 P-  
 TQWLTEWAPEPRDVFWNSLAIPYVSLTVRRLIMHVAFFFLTFFFIVPIAFVQSLATIEGIVKAAPFL  
 KFIVDDKFMKSVIQGFLPGIALKFLAFLPSILMIMSKFEGFTSISSLERRAAFRYYIFNLVNVFLAS  
 VIAGAAFEQLNSFLQSANQIPKTIGVAIPMKATFFITYIMVDGWAGVAGEILMLKPLIMFHLKNAR  
 EEAMDPGSIGFNTGEPRIQLYFLLGLVYAPVTPMLLPFILVFFALAYIVYRHQIINVYNQYYESAA  
 AFWPDVHGRVIAALVISQLLLMGLLGTKHAALAAPFLIALPVLTIQFHFKGRYEPAFIRYPLQE  
 AMMKNLNLKGYLQNAAYVHP  
 >Arabidopsis\_thaliana\_Q8GUH7  
 ----LLSALLTSVGINLGLCFLFFTLYSILRKQPSNVTVYGPRLVKK-D-GKSQ--  
 LPTAGWVKRALEPTNDEILSNLGLDALVFIRVVFVSIRVFSFASVVGIFILLPVNYMGTEF--  
 KKSMDNFSISNVNDGSKNLWIHFCAIYIFTAVVCSLLYYEHKYILTKRIAHLYSSK--  
 PQPQEFTVLVSGVPLN-  
 SIVETVENFFRESSYLSHIVVHRTDKLKVLMNDAEKLYKKLTRVKSGSISR----  
 QKSRWGFNGNVDVVDHYQKKLDKLEDDMRLKQSLLAG-  
 EVPAAFVSRTRHGAAIATNIQQGIDP-  
 TQWLTEAAPEPEDVHWPFFTFASFVRRWISNVVVLVAFVALLILYIVPVVLVQGLANLHQLETWF  
 PFLKGLNMKIVSQVITGYLPSLIFQLFLLVPPIMLLLSSMQGFISHSQIEKSACIKLLIFTVWNSFF  
 ANVLSGSALYRVNVFL-  
 EPKTIPRVLAAVPAQASFFVSYVVTSGWTGLSSEILRLVPLLWSFITKLEFEVP---  
 STPFCQEIPRILFFGLLITYFFLSPLILPFLLYYCLGYIIRNQLLNVAAYETGGKFWPIVHSY  
 TIFSLVLMHIIAVGLFGLKELPVASSLTIPLPVLTVLFSIYCQRRFLPNFKSYPTQCLVNKMSEFYS  
 ELVVAYRDP  
 >Arabidopsis\_thaliana\_Q8VZM5  
 ---ATINDIGVAAAINIVTAFALLAFIFRIQPVNDRVYFPKWYLKG--  
 LRSSSIIRFLNWMPEALKMPEPELVDHAGLDSVVYLRIYLLGLKIFFPIACVAFTTMVPVNWNTN  
 GLDRFSDIDKLSLSNIPNGSPRFVHLCMAYAITFWTCFILKREYQNIALMRLQFLANDQ--  
 RRPNQFTVLVRNIPAE-  
 SICELVEHFFKVDHYLTFQAVHDATKLSLVLTRKMQNLLDYNINKHMRNLSN-  
 RPVIKMCGEEADGIKYYTSVVEGLTREISEEKQRLRTKSIVPAAFVSFKSRWGAAVCAQTQQTR  
 NP-  
 TEWLTEWAAEPRDIYYDNALPYVDLIRRLIVGVAYFFLTFFFMIPIAFVQSLANIEGIEKAFPF  
 KPLIEVKLLKSIIQGFLPGIALKIFLLFLPRILMQMSKFEGFVSTSSLERRAATRFYMFQFINVFLGS  
 IVTGTAFQQLNSFLQSANIPKTIGVSIPMKATFFITYIMVDGWAGVAGEILRLKPLIYHLKNSRE  
 EATDPGTIGFNTGEPQIQLYFLLGLVYAAVSPILLPFILVFFGLAFVYRHQVINVYNQKYESAGK  
 FWPDVHRRVVTALVVSQLLLMLLSTKHASKSTPLLLVPLLTIGFHKHCKNRYQPAFVTYPLQ  
 EAMIKNLNLKAFLRDAYAHP  
 >Arabidopsis\_thaliana\_Q94A87

---DVSALLTSAGINIAICVVLVSLYSILRKQPANYCVYFGRLLSD-G-RVK---  
APSPSWLVKAWETTEEEMLAAAGLDVVFIRMVICSIRIFSIVAVVCLAFVLPVNYGQKM--  
LES LGVFTIENLNPRSRWLWVHCLSLYIISAAACALLYFEYKNIKKRLAHISGSA--  
SKPSHFTVLIRAIQQ-SYSETVSKYFTNPSYVSHLMVYRDGFIHRLMNETERMCAIKHVSP---  
DL---SCNPSLCGAATNSFQIISNETDSVKG-LELGELTLTEE-  
ERPVAFFVFFKSRDALVVSEVLQTPNP-  
MLWVADLAPEPHDVHWRNLRIPIRQLWMRRIATLVGAIAFMFVFLFPVTFVQGLTQLPTLSKNF  
PFLKDLLNRRFMEQVITGYLPSVILVFFYTPPLMMYFSTLEGCVSRSQKKSACLKILYFTIWN  
VFFVNILSGSVIRQFTVLN-  
SVRDVPAQLAKLVPAQAGFFMTYCFTSGWAGLACEIMQPVGLIWNLIKVSYETL---  
RFPYHTEIPRLLLFGLLFTNSVIAPLILPFLLIYFFFAYLIYKNQIINVYITKYESGGQYWPVFHNTT  
IFSLILSQVIALGFFGLKLVASGFTIPLILLTLLFSEYCRQRFAPIFQKYPAEILIAMMEEIHNNLK  
VAYSQI  
>Arabidopsis\_thaliana\_Q9C792

-----  
MESSGLDGVVFMRMITFSLKVFLFAGIIGVFLPVNCFGDQLTVANSLDLFSVANLKVRSQWL  
WVHFGAIYLVTVFVCCLLYFEFRYIALKRIEHFYSSK--PKPEQFTILVRNIPSS-  
SVSDTVDRFFGESTYFHVVIHRTSKLRSVVDKAKKLYKEVKHKKPVKKT-----  
FSRKDNTEGHYESVLQEMEQNIRLQAEVSGK-EVRAAFVSFKSRYGAATALHMPQSINP-  
TYWLTEPAPEPHDVHWPFFSASFQKWLAKILVVFACLLLTILFLVPVVLVQGLTNLPALEFMFP  
FLSLILSMKVVSQIITGYLPSLILQTSKLVVPTMEFLSSIQGHICHSDIQKSACNKVIWFTIWNVFF  
ATVFSGSFAFYKLSVIL-  
DPKQIPLKLAVAVPAQASFFIAYVVTGWTDLTTELFRVVPFMVSYIKRSEFVVP---  
PMRYHRDTPRVLFFGLLITYFFLAPLILPFLIYFILAYIYRNQFMNVYAPKFDTGGMFWPMIHY  
TMIFSLVLMQAIAGLFAKKMELATYLLVPLPVFTLLFNEFCRKRFPIFTDYPAEVLTKRMPEF  
YNNLVSAYKDP

>Arabidopsis\_thaliana\_Q9C8G5  
---EFGSFLVSLGTSFVIFVILMLLFTWLSRKSGNAPIIYYPNRILKG-----  
RNPFAWMREALTSSEQDVVNLSGVDTAVHFVFLSTVLGIFACSSLLLLPTLLPLAATDNNIKNFS  
QLDNLSMANITKSSRLWAFLGAVYWISLVTYFFLWKAYKHVSSLRAQALMSAD--  
VKPEQFAILVRDMPAGQTQKEFIDSYFREETFYRSLVATENSKVNKIWEKLEGYKKKLARAEAIL  
AATNN--RPTNKTGKQVDSIEYYTELINEVAKLETEQKAVLKQ--  
QTAAVVFFTRVAAASAAQSLHCQMV-  
DKWTVTEAPEPRQLLWQNLNIKLFSRIRQYFIYFFVAVTILFYMPIAFVSAITTLKNLQRIIPFIK  
VVEITAIRTVLESFLPQIALIVFLAMLPKLLFLSKAEGIPSQSHAIRAASGKYFYFSVFNVFIVTL  
AGTLFNTVKDIKPNPKMIINLLATSLPKSATFFLTIVYALKFFIGYGLELSRIIPLIIFHLKKVKEAWY  
PGDLSYATRVPGDMLLITFCYSVIAPLILIFGITYFGLGWLVLNRNQALKVYVPSYESYGRMWP  
IHQRILAALFLFQVMFQYLGAKTFFYT-ALVIPLIITSLIFGYVCRQKQFYGGFEHTALEVA-CR-----  
EIFRAYIPH

>Arabidopsis\_thaliana\_Q9FVQ5  
---ATLQDIGVSALINLFGAFLIAFAVLRIQPINDRVYFPKWYLTG--  
ERNSPRFTFLNWMPQAMKSESEIIRHAGLDSAIFLRIYTLGLKIFAPVMVLALVLPVNVSSG  
TLFFVSNIDKLSISNVQPKSSKFFFHIAVEYIFTWACFMLYREYNNVAIMRLQYLASQR--  
RRPEQFTVVVRNVPDH-  
SVPDVTVDQFFKTEHYLCHQAVYNANTYAKLVKQRAKLQRWFDYVVLKHQRNPHK-  
QPTCRTWGRVDSIEYYKQIQIKEFDHNMSLERQKVLKMLPVAFVSFDSRWGAAVCAQTQQ  
SKNP-  
TLWLTSSAPEPRDIYWQNLAIPIFISLTIRKLVIGVSVFALVFFYMPIAFVQSLANLEGLDRVAPFL  
RPVTRLDIFKSFLQGLPGLALKIFLWILPTVLLIMSKIEGYIALSTLERRAAAKYFFMLVNVFLG  
SIIAGTAFEQLHSFLQSPSQIPRTIGVSIIPMKATFFITYIMVDGWAGIAGEILRLKPLVIFHLKNMRV  
RAMDPGFVDFKETIPSLQLYFLLGIVYTAVTPILLPFIFFAFAYLVYRHQIINVYNQQYESCGAF

WPHVHGRIIASLLISQLLLMGLLASKKAADSTPLLIILPILTLFHKYCKHRFEPAFRQYPLEEAMA  
 KELNMKADLADAYLHP  
 >Arabidopsis\_thaliana\_Q9LVE4  
 ---ATLTDIGVAATINILTAFAFFIAFAILRLQPVNDRVYFPKWYLKG--  
 LRSSPIIRFLNWMPQALRMPEPELIDHAGLDSVVYLRIYLLGLKIFFPIACIAFTVMVPVNWTNSTL  
 DQFSDIDKLSISNIPTGSSRFVHLCMAYVITFWTCFVLQREYKHIASMRQLFLASEH--  
 RRPDQFTVLVRNIPPE-  
 SVSELVEHFFKVDYYLTYQAVYNANKLSELVQKRMKLNWLDYYQNKHSRNPSK-  
 RPLIKIWGEEVDAIDHYIEKIEGLTRKISEEKETVMTKSLVPAAFVSFKKRWGAVVCSQTQQSRN  
 P-  
 TEWLTEWAPEPRDIYWDNLALPYVQLTIRRLVIAVAFFFLTFFFMIPIAFVQTLANIEGIEKAVPFL  
 KPLIEVKTVKSFIQGFPLGIALKIFLIVLPSILMLMSKFEGFISKSSLERRCASRYMFMQFINVFLCSI  
 IAGTALQQLDLSFLQSATEIPKTIGVSIKMKATFFITYIMVDGWAGVAGEILRLKPLIYHLLKNFREEA  
 MDPGTIGFNTGEPQIQLYFILGLVYAAVSPILLPFILVFFALAYVVYRHQIINVYNQEYESAAAFWP  
 DVHRRVIALIVSQQLLLMGLLSTKKAARSTPLLFILPVLITGFHKFCQGRYQPIFVITYPLQDAMVK  
 NLNLKTFLQNAYAHP  
 >Arabidopsis\_thaliana\_Q9M1H6  
 ----TPESLLASASINIGLAVVALWLFVSVLKKQPRNAVYYARRLSR-  
 HHRPRLPSVAWIPRAFRVPEDEILSRHGLDALVLIRLFKFGIRFFLMCSLLGASLLLPVDYYNES  
 ---EYSMDAFTISNITRGSNKLWVHFSCLCISFYALFLLHKEYKEILVIRLQQMKELR--  
 HRADQFTVLVRQVPLHNTRGCAVDHFFSKFSYHSHQMLYDGRDLEYLLGKQKLLKKELEDKR-  
 -----HTGSQEHEKQISTSEEKREITHMIYHLQSETMEK-  
 ELPVAFVTFKSRRNAALAAQTQQHSNP-  
 LELITEMAPEPRDVSWRNLAIPQKILPLNKIGVILAAALLTIFFAIPVTAVQGIKYEKLLKWFPPAM  
 AIEFIPGLSSVVTGYLPSAILKGFMYIIPFAMLGLAYLGGISISNSKEEIKACNMVFYFLMGNVFFLS  
 LISGSLLEIGEYLTHPRDIPSHLAAAVSAQAEFFMTYILTDLGSLGFSLEILQLGLILFDIIRSYPYL  
 F---SFPYFRVIPTVSLSIMIGMIYAVVAPLMLPFLVGYFCLGYIVYFNQ--  
 DVYETTYDTCGRFWPFIHHYIFVSIILMQITMVGLFGLKSKPSAAIATVPLILITAIYNEYCKIRFLPS  
 FKHFPIQTAVEIMETHYVDAATAYHQP  
 >Arabidopsis\_thaliana\_Q9MAV5  
 ---ATLADIGLAAAINILSALIFLLLFAILRIQPFNDRVYFPKWYLKG--  
 VRSSPVVRFNLWMPDALKMPEPELIDHAGLDSAVYLRIYLLGLKIFGPIALLSWSILVPVNWTSD  
 GLQLSSNIDKLSISNVERGSDRFWAHLVMAYAFTFWTCYVLMKEYEKIAAMRLSFLQSEK--  
 RRADQFTVLVRNVPPE-  
 SISENVQHFFLVDHYLTHQVVYNANELAKLVEDKKKMQNWLDYYQLKYTRNKEQ-  
 RPRVKMWGKKVDAMDHYTAEIEKLSEQIMEERKRIKDKSVMQAAFVSFKTRWGAAVCAQTQQ  
 TKNP-  
 TEWLTEWAPEAREMYWPNLAMPYVSLTVRRFVMHIAFFFLTFFFIIPIAFVQSLASIEGIEKSAPF  
 LSPVKNKLMKSLIQGFPLGIVLKLFLIFLPTILMIMSKFEGFISISSLERRAAFRYYIFNLVNVFLGS  
 VITGSAFEQLDSFLQSANDIPRTVGVVAIPIKATFFITYIMVDGWAGVAGEIFRLKPLVIFHLKNFRE  
 EAMDPGQIDFYATEPRIQLYFLLGLVYAPVTPVLLPFIIFFGFAYLVFRHQIINVYNQKYESAGAF  
 WPDVHGRIISALISQILLGLMSTKGVQSTPFLVLAILTFGFHRFCKGRYESAFVINPLQEAMI  
 KNLNLKGFLQNAYVHP  
 >Arabidopsis\_thaliana\_Q9SY14  
 ---ASVQDIGLSAAILLSAFAFLFAFAMLRLQPVNDRVYFPKWYLKG--  
 IRGSPTVKFLNWMPAALQMPEPELIEHAGLDSAVYIRIYLLGLKMFVPITLLAFGLVLPVNWTGE  
 TLENFSNVDKLSISNVPPGSPRFWAHITMTYVITFWTCYILYMEYKAVANMRLRHLAAES--  
 RRPDQLTVLVRNVPPE-  
 SVNEHVEHFFCVDHYLCHQVVYNANDLAKLVAQRKAMQNWLTYYENKFERKPS-  
 RPTTKTWGTTVDAIDFYTSKMDILAEQEAVEREKIMPKAIMPAAFVSFRSRWGTAVCAQTQQC  
 HNP-

TIWLTEWAPEPRDVFWDNLAIPYVELSIRLLTTVALFFLIFCFMIPAFVQSLANLEGIQKVL PFL  
KPVIEMKTVKSVIQGFLPGIALKIFLIILPTILMTMSQIEGYTSLSYLDRRSAEKYFWFIIVNVFLGSI  
TGTAFFQQLKSFLQPPEIPKTVGVSIPMKATFFITYIMVDGWAGIAAEILRVVPLVIFHLKNTRQQ  
AMDPGHLD FATSEPRIQFYFLLGLVYAAVAPILLPFIVFFAFAYVFRHQVINVDQKYESGARY  
WPDVHRRLLIICLIISQLLMMGLLSTKKFAKVTALLPQPILTFWFYRYCAGRFESAFSKFPLQEAM  
VKNLNLKEYLKDAYVHP

>Arabidopsis\_thaliana\_Q9SZT4

IPDAWYGNIQYLLNISVIGLLCCVSIFLVKLRSDHRR-----  
SALFSKLLAVWKATCREIARHCGADAAQFLIEGGSFVLLFSIAVLAVSVMLPLNLYAGTA--  
SDELSKTMITHIQKGSALLWLHFVFFVIVVVISHFGIAAIEARLKFTRFRD----  
NANSTAVFTIMVQGLPKNLGSDRVFEDCFRLGKVKYFIVPMDL CALDDLATELVVRV RDEITWL V  
AKMDSRLL-----DEKLRKLQELRADLESQLAAYKEG--  
RAQGAGVAFVMFKDVTANKAVQDFRESVRLQQWKVDRAPLATDIYWNHLGLTKVALIVRRVI  
VNTILLILVFFSSPLALISALVSAGRIFSAQYWL TWVQTS-  
WIGSLIFQFLPNVFIFVSIYIP SALSYSKFERHLTVSGEQRAALLKMVCFFLVNLIILKALV ESSL  
ESASCYLDGDR-  
IEYMSPSFLSRSCVSALAF LITSTFLGISFDLLAPIWIKKKIQKFSRTPIPKQKFDFAQYYAFNLTI  
FALTMIYSSFAPLVVPVGAVYFGYRYIVDKYNFLYVYRVRGGNEGKLM DTVLCIMRFCVDLYLV  
SMLLFFSVKGDSTKLQAI FTLGVLV MY--KLLTD RYHPALRSIQ TDSI-----IDGPVDYEAYSH P

>Arabidopsis\_thaliana\_Q9XEA1

---ATLKDIGVSAGINILTAFFIIFAFRLRQP FNDRVYFSKWYLRG--  
LRSSPALKFLHWMPEALKMPERELIDHAGLDSVVYLRIYWLGLKIFAPIAMLAWAVLVPVNW TN  
NELELSSDIDKLTISNIPEG SNRFWAHIIMAYAFTIWT CYMLMKEYETVANMRLQFLASEG--  
RRPDQFTVLVRNVPPE-  
TVSELVEHFFLV DNYLTHQVVCNANKLADLVSKKTKLQNWLDYYQLKYTRNNSQIRPITKLCGQ  
KVDAIEHYIAEVDKTSKEIAEERENVVQKSVMPASFVSFKTRWAAAVCAQTTQTRNP-  
TEWLTEWAAEPRDIYWP NLAIPYVSLTVRRLVMNVAFFFLTFFFIIPIAFVQSLATIEGIEKVAPFL  
KVIIKDFIKSLIQGLLAGIALKFLIFLPAILMTMSKFEGFTSVSFLERRSASRYYIFNLVNVFLG SV  
IAGAAFEQLNSFLQSPNQIPKTIGMAIPMKATFFITYIMVDGWAGVAGEILMLKPLIYHLKNAREE  
AMNPGSIGFNTGEPQIQLYFLLGLVYAPVTPMLLPFILVFFALAYVYR HQIINVYNQEYESAAAF  
WPDVHGRVITALIISQLLLMGLLGT KHAASAAPFLIALPVITIGFHRFCKGRFEPAFVRYPLQEAM  
MKNLNLKGYLQDAYIHP

>Aspergillus\_niger\_A2QDK9

SSAFQVNAIWASLATSAGFSILLALLFSLF--RPRHSVVYAPKVH---  
DNKHTPPPRGFFAWLKPVLRTKEPALVECI GLDATMFVRFTKMCRNIFIFLSIIGCGLMIPLNL TQ  
STG--YGAFSTMTVLYVTS-N-  
AIWGQVICAWAFDAIIAFLWRNYKGV LALRRKYFESSEYQRSLHARTL MITDIPPAARGDEGVL  
RLTDEAAVPRASIGRNVKGLPRLIKEHDET VRELEAVLAKYLKHPDPKRPTMRPTNGRVD AIDY  
LTDKIKRLEEEIKHVRSSI-DRRAMPFGFVSWDMIEHAH AVAYTARKKHP-  
EGTTIVLAPRPDDL IENLPLSKAARKWKRFLSAI WVSLTLVYVVPNGLIAILSNLNNLASV WPA  
FKTSMDNSYIWA AVQGILSPA VTSLVYIVLPIIFRRLAIRAGDVTKTSRERHVLNKLYTFFVFNNLI  
VFSLSAAWTFVSAVIDAERSLYIKIVNALCQVSPFWVTYLLQRNL-  
GATIDLIQLVSVFVWFVSKTAIEWTAPP AFDYASYNYFLFYATVALCFATLQPIVLPVTALYFGL  
DAMMKYMLLYVFTKTESGGQFWRVLFNRMLFAVILSNIIIIIVATAKGTW TMVYCVIPPPLML  
AFKFYCMRKFD DDITFYNRANLT--KK-ASERLNSKFGHP

>Aspergillus\_niger\_A2R3B1

SASNSASGLVTTLVPSLISAAAMV IIFIL--RRSETRMYMPRTYLGVP-  
SERTPATGLWNWIMQMYRLPDEYVLQHHSMDAYLLL RFLKIVSMICFVGACMTWPILFPV NAT  
GGG--G-SQLDMLSMSNV-  
DKYARYFAHAFVAWL FVGFFYTTITRECLFYINLRHAYALAPAYASRLSSRTVLFTAVTEDYLSR  
DKIRQMFGEKVKNVWLTNTSELDDKVAERDDAAMKLEAAETKLIKLANQDRPTHRLVGVKKV

DTINWARSEIERLTPEIEELQAKHRNADLVSSVFVEFHAQADAQQAFQSVAHNYP-  
LHMAPRIGLEPTQVIWSNLRIKWWERLIRYSATIAFVVALIVFWAIPAVVGCISNINFLTDKVPFL  
RFINDVPWILGVITSLLPTVLMMSVLMALLPIVLRMLAKFGGAPSLAAVELTTQNFYFAFEVIQVFLV  
VTISSASSVVTKIINNPTSAAASLLAENIPTASNFYISYIILQGLSFSAGALLQISGLILGKVLGRMYS  
WSNLAGLGWGTVPVFTLLAVIAIVYSCIAPLVLGFATIGLYLFYFAYRYNMLYVSNANIDTQGKA  
YVQGLKHLTVGCYLLMVCLIGLFAIGTATGPLVLMILLVFCVLYHVALNNALEPLIQYLPKNLESE  
E-KYAPEVERDAYFNP

>Aspergillus\_niger\_A2R6X5

GDSTSLSAFLTTLIPALVIAAFWFGLFLIC--RRTQLRC-----  
ERAPRSGFINWFGQFLKISDAQVLRHSSMDGYLFLRFLRVLSATCFTGCVITWPILLPINATGGA  
--G-TQLDALSFSNV---PSSITRHGLMFCVE-  
AFVFFVVTRESIFYANLRQAYFNSPAAYAERISSRTVLFMSVPEEYKNEKTLRQVFG-  
NNINRIWITSECKTLDDKVMERAKLAYKLEHAETKLIRAANIKRPTHVFGKKVDTIRWLRAELTK  
VIEEISILQKKHREMKNLSAVFIEFATQKDAQVALQTVSHHQ-  
LHMTPRIGISPNEVVWSALNLSWWQRIARRFAVQGGLAALVIFWSIPSAMVGTISNITYLTSMIP  
FLGFINKLPVILGLISGLLPSAALALLMSLVPIICRACARVSGVPSTSRVELFTQSAHFCFQVVQVFL  
LVTTLTSASAATAQIIKDPKSAKDLLAENLPKATNFYISYFLLQGLTMSSMAVVQVAGAVVFKFI  
TTLYQWAALSGVGVGNVFPVFTNMGVIAITYSCIAPLILGFVGLYLVYQAYRYNFLFVYELRI  
DTRGLVYPRALQHLLTGIYLADICLIGLFAIKGAIGPLIIMALFLIVTILAHISLNDALEPLYSFLPANL  
DVEE-RYTEEERNKAYYEP

>Bos\_taurus\_A7MB88

LQGVTFGGIPTVLFIDVTCFLFLIAAFSIIRKFWVDYG----RILEGNSS-  
SSSQMGGLCSWLTAIFRLHDDQILEWCGEDAIHYLSFQRHIIIFLLVVVSCLSLCVILPVNLSGDLL  
--PYSFGRTTIANLQTDNLLWLHTVFAILYLILTVVFMRHHTQSIKY-----  
KEESLVRRTLFVTGLPRHAKK-  
ETVESHFRDCEVVEVQLCYDVAKLIYLCKERKKTEKSLTYTTLQVKTGQNPCKPCG-Q--  
EWEDAISYYTRMKDGLMERITEEEECRV-  
QDQPLGMAFVTFQEKSMATYVLKDFNASSSELRRWSVTFAAYPEDICWKNLSIQGFRWWFQWL  
GINFILFVVLFFLTPSIIILSTMDKFNV-----  
KLNNPVISQFFPTLLLWSFSALLPTIVYYSTLLESHWTKSGENWIMMTKVYIFLIFMVLILPSLGLT  
SLDFFFRWLEA---  
SIRLECVFLPDQGAFFVNYVIASAFIGNGMELLRLPGLILYTFRMVKNVQNQAFEYEFGAMYAW  
MLCVFTVIMAYSITCPIIVPFLIYILLKHMVDRHNLYFAYLPA-  
KLEKRIHFAAVNQALAAPILCLFWLYFFSFLRLGLKAPLTLFTFLVLLLILVCLAYTCFGCFKHS  
PNYK-----QQQTY---

>Bos\_taurus\_F1MY22

LQGLPFGGVPTVLALDFMCFLLALLFLFSILRKYVAWDYG----RLLDADTS-  
VSSSVNGFCSWLTAIFRIKDDDEIRDKCGGDAVHYLSFQRHIIIGLLVAVGVLSVGIVLPVNFSGDLL  
--AYSFGRTTIANLKSGNLLWLHTSFAFLYLLTVYSMRHTSKMRY-----  
KEDDLVKRTLFIGISKYAES-  
EKIKKHFEECTVLEARPCYNVARLMFLDAERKKAERGKLYFTNLQSKDNVNPCKPCG-H--  
EQVEAIEYYTKLEQKLEKEDYKREKEKV-  
NEKPLGMAFVTFHNETITAILKDFNVSSSLHNWTVSYAPDPQNIYWEHLSIRGFIWWLRCLVIN  
VVLFFLFFLTPAIITMDKFNV-----  
KLNNPIITQFFPTLLLWCFSAALLPTIVYYSAFFEAHWTRSGENRTTMHKCYTFLLFMVLLLPSLGL  
SSLDLFFRWLEA---  
AIRFECVFLPDNGAFFVNYVIASAFIGNAMDLLRIPGLLMYIRLCRNVRHQAYEFQFGAAYAW  
MMCFTVVMYTSITCPIIVPFLMYMLLKHLDVDRYNLYYAYLPA-  
KLDKkihsgavnqvvaapilclfwllffstmrtgflaptsmftfvvlvitivvclchvcfghfkyl  
SANYK---S---SGDEPPS---

>Botryotinia\_fuckeliana\_A6RS77

SSGSSLSGLVATLVPTFILAAVYFVIFLIL--RRSNVRWYAPRTYLGAE-  
EERTKPSGWFNWIGPFRKIPDIYALQHQLDAYLFLRFLRMTVVIMFVGGCITWPILFPINATGG  
G--G-  
QQLDILSMGNISSGRDRYYATCFVGVWIFFGFVFLVLTRETIYVNLRQAFLLNPTFANRISSRTVL  
FISVPAAYLEEGKLRKVFG-  
SAVRNIWIAADSEKVDDELVEKRDEIANKLESAEVKLIKANKERTPTHKLYGKKVDTINWARSELE  
TLIPETEAAQSTYLETKKVGSVFIEFAHQSDAQIAFQTLAHHQA-  
LQMSPRIGVHPSEVIWGSALTISWWQRVRRFAVVGFIALIVFWAIPVAAVGLISNVTYL-  
EQFSWLSWLKDIPWIMGVVSGLLPSVALSILMSLVPIIMRLCARLSGEPPTARVELFTQNAFYAF  
QVIQVFLVVTIASSASSVLYQLINNPTGILLSLANKLPSASNFYISYFIVQGLTVAAGVISQVVGFFV  
FKILYKMYQWTSLSAISWGSTLPVFTNIAVIGITYSCIAPLVMGFATIGMSFFYLAYRYNIFVTD  
QIDTKGLIYPRALQQLTGVYLSLCLIGLFAIGKAWPQMILMIIFLVFTALYHISLNAAMDPLLSTL  
PKTLEAEENLYDDVTARNAYYPP  
>Botryotinia\_fuckeliana\_A6RVV4  
RAQLSQNSIYASFGTSIGFTLLLAIGFSL--RPYNSVVYAPKLI---  
DDKHAPPPKGPLAWLGPVLKTKETELVNLIGLDATIFLRVLRMFRNMFLCITVVGCGILIPINMTK  
G---TDFVSRVTPVNVWG-S-  
SNWGMTICAWLFDLIIMVFLWLNYRAVLNLRRTYFESADYQASLHARTLMINDIPKTLRTDEGIG  
RVIDVSSFSRTVARNVKELPELIEQHDQTVRDLEGYLARYLKDPAPKRPECTPRGQKLDIAIEY  
LTARIKELEMEIKEVRLSV-DNRPLPYGFASYEAIDEAHGIAFAARKKHP-  
KGTIVLAPRPNDIIWQNMPLSRQTRKRKRIMNNIIVTLLTIVWVMAPNALISILVSLPNLGSVWPA  
FQTSLAQHVVWSIVQGVASPAVTSLVYLVLPPIFRMLVKAGDRKTARERHVTGKLYTFFVFN  
YLLVFSIFSTVWTFVSTVVKNTNDLGLLVFISLCDISPFVWTWLLQRNL-  
GAAVDLAQLWTLVWSFCARKMIELTAPPFDYASYNYFLFYTTVTLCFGCIQPLVIPAAAMYFS  
LDVFLKKYLLLYIFITKTESG-----AILANLVFLSTWVHG-  
HMEAYAVIPLPFLVIGFKWYCARTFDDKIHYYSVRNML--GS-KGDRLASRFGHP  
>Brassica\_campestris\_A8IXK5  
----EFESFLVSLGTSAVIFVVLMLLFTWLSRRPGNVSVYYPNRILKG-----  
RNPFAWIREAFTSTEQDVVKLSGVDTAVYFVFLSTVLGIFALSALLLPTLLPLSATDNSLKTFSQ  
LDNLSMANITRRSSRLWAFLGAVYVWVSLVTYFMLWKAYKHVAALRAEALMSSE--  
VLPEQYAILVRDIPSGETQKEFVDSYFREETFYRSLVVTENSKINKIWENLEGYKKKLARAEAVF  
AATSN--RPMNKTVGERVDSIDYYTKLINESVAKLEAEQRTVLKQ--  
QTAAVVFFTDRTAALAAQSLHCQMV-  
DKWTVTEAPEPRQLIWENLKIKFFSRIVRQYLIYFLVAITILFYMPIAFVSAITTLGNLQKALPFIKPI  
VEIAFIRTIQSYPQIALIVFLAMLPKFLMFLSKSEGIPSQSHAIRAASGKYFYFVSVLNVFIGVTLA  
GSLFDNLKALRRNQTPAIYRLATSLPKNATFFLTYVALKFFVGYGLELSRIIPLIIFHLKKKVKKEAW  
YPGDLSYATRVPDMLILITFCYSVIAPLILVFGVIYFGLGWLILRNQALKVYVPSYESYGRMWP  
HIHTRILAALFLFQLVMFGYLGAKLFWWA-TLLVPLIFISLIFGYVCRQKFYKGFHTALEVA-CR---  
--EVFRAYIPY  
>Brassica\_juncea\_A9LIW2  
----EFASFLVSLGTSIIFVVLMLLFTWLSRRPGNVVYYPNRILKG-----  
RNPFAWIREAFTSTEQDVVKLSGVDTAVYFVQSTVLGIFALSALLLPTLLPIAATDNNLETFSQ  
LDNLSMANITKSSSRLWAFLGAVYVWVSVTYFMLWKAYKHVAALRAQALMTSE--  
VLPEQFAILVRDIPSG-----GDSERINKIWEDLEGYKKKLARAEAAFAATSN--  
RPTNKTVGERVDSIDYYTKLINESVAKLEAEQRTVLRQ--  
QTAAVVFFTDRTAALAAQSLHCQMV-  
DKWTVTEAPEPRQLIWENLKIKFFSRIVRQYVIYFLVAITILFYMPIAFVSAITTLANLQKALPFLKP  
IVDIAFIRTILESYPQIALIVFLAMLPKFLMFLSKSEGIPSQSHAIRATSGKYFYFVSVLNVFIGVTLA  
GSLFENLKALEEKPNFITLLATSLPKSATFFLTYVALKFFVGYGLELSRIIPLIIFHLKKKVKKEAWY  
PGDLSYATRVPDMLILITFCYSVIAPLILVFGVIYFGLGWLILRNQALKVYVPSYESYGRMWP



IHTRILAALFLFQLVMFGYLGVKIFVWA-ILLVPLIFISLIFGYVCRQKFYGGFEHTALEVA-CR-----  
EVFRAYIPH  
>Candida\_albicans\_C4YKA8  
SSNSSVSQFLSTLIPTLVISVVFLAFIVI--HSKQRRVYEPRAVVESD-  
DLRTETKGPFSWLTLYLLAKPRTFYIQYAGTDGYFFLRFLFEFFCVCVLGAVITWPILFPVNATNG  
N--NVKGF DILTFANI---  
KWRTFAHVFLSWILFGAVIFLIYREL VYYV TYRHALQTTPLYDSLSSRTLLLTEISTEYLQDDKLR  
GYF--  
PTATNIWYSRDYKKLQKQVKERTKLANKEYEGLNKVLT KAVKKRPTHK LIGKKVDTLDYSPEKL  
GELNKEITKEQTEYQTYDQLPAVFIEFPSQLEMQKAYQAIPYQPD-  
FKGVKTINAAPEDIWENLQLTSMKRRIKSIIANTIL TLLIIFWCIPVAVVGSISNINVLTDKVPFLKFI  
KMPVIMGVITGLLPVVALAILMSLVPPFIKWMGKISGR LTIQQVESYCQSWYFAFQVVNVFLAIAL  
GSSAAAVATQIVQNPGEALQKLSSSFPKSVNFYYSYLCLQGLTISSGVLLQIVALILSHILGRKWT  
WNTLGQPAYSTLYPGFQLLTVIALSYSVIAPLILGFTAIAFILFYFAYIYTMIFVLRSTVDARGTNYI  
KSLFQLFTGLFLAQLWITAFVFSKNWACVALEGVIVVV TIAARLWMKWKFLPLVDAVPISAIKYAI  
EYHSDFIRHAYDDP  
>Candida\_albicans\_Q59MD1  
HSVGPQRVFTTQLVLTLIAGMFSFLLFCMLR FKWPH--IYAVRTR-----  
NNLFGWIKVVYKITDEEIIACSGLDTFVYLRFFKMGIKIFLILSISAI FVLSPIRYYFTGN YD-ENIM---  
-T-YDFPSFYWVYPIFTYVFSIVVFYLLFEFTTILRTRQKYLASQ---  
SSITDRTIKLDGIPKRLQREKLLKFIEDGKVL DVKLIYNWTPLEDLLH KRQELMNNLESM-----  
AVNP--Q-----NELANKYTQELIELDGEIKHMQ GK--EFKQVPSAFITMDSVASAQMAAQ TILDPRV-  
YKLIASLAPAPKDIIWENLKLTYFERKIKSYFITL VIVLSYGFII FLVIPLTSLLDLKTISKFWPALGEFI  
GQSWLTTFTVGTILPPLLFTLLNFSFPYFYQYLSQL QGYTSNSDVELSTLSKNFFFIFFNLF LIYVA  
AGTFWDYMSYISDT-  
TKIAVQLATSLRRMALFYVDLILLQGLTMFPVKLL QVSDFFLFYFKRLYRSYFTPQIFDFGINLPQ  
HILIFMIILYSVVSTKIVTCGLIYFILGLFVYKYQL VYNFVHPPHSTGKVVPMIFRRVILGLIIFQLFM  
CGTLALESAILLSILCTPLIFITMIILWNFEKYYV PLNTFIALRAINPYTLDEERE EFTDYTYP  
>Candida\_albicans\_Q59TM5  
SSGIEFSVLMKTLFTSLCFCTIQLTLFCLL--RPVFN YLYQPRCF--CI-  
NERMETREFFKWIVPTLKC SINTYL-SLGLDAYFFIRFISVLSLFFLFIGTLNMVILIPINYTGSS--  
TAFGLDKLSLSNI-  
TNVSRLNAHFLMGLITIGFFHWLIVYEFQSYVIIR QSYLLSQPHKDSVMAKTLLISNVPPYLQNH E  
VLKTIQVGGIKDIWDINEFEIIDHQVEIAQDALH YLEKSQVLGLKYYIRIPQIERFQKPIPMYEW S  
LQTLSECNQKIDEEKLKLAKLAKHSKIFIEFTSQEGSYIAHQCLLSQSQ-  
GFLDKTIEINPNDIWRNVRNDGIACKFEKYLVTI AFISIIILYVIPVSLIGLVSQIPLLTQLLPFLEW IY  
QFPEARETIAGFLPSILLGVLTEIVMIIFRFLTYFKGRTTGCEVEIDLQKWYFAFLVQQFLVVTISS  
SVTVILKQIIDQPTSIPVLLATNLPKSATFFFQY ISLRAFAFCGNNFLRISPLIQSLIVCKKFNITNLP  
KIKWGTTFAYYSIYACIGISYSIISPLISIFIIFFLNLSILYYKYALKYVYHNESETTGRLYPTALLHLYT  
GVYCLECCLIGVFFLSKGW----IMTGILITIFANT IYNYRYPHFSNLPILSDTFK-  
DTCYSNHKLLYLHP  
>Candida\_albicans\_Q5APG0  
PSSVSTSTIISTLLANLALFGVVFVGC FIVL--RLKFKRIYSPKSSFDLE-  
EKKPEPKDPFRWIFILLTKPDSFFLQQAGLDGLVFLRYIKTFGTLFLCALL-MYIILLPVNATNGN--  
H-KGFDQLSIANV---  
PRRYAHVLMGLVFN GIVIFVIYRELFFYN SLKNAVLSSPKYAKKLSCRTVLFQGV PDSLLDEKQ  
AFKIF--  
NGVKRVYVARTARELEYKVEKRAAMVTKLENAEN KLMKMAVKKRPMKVFSSKVD TIRHCQE  
QIPILDKEVKKLQKKFRHSMP LNSIFVEFENQYYAQLAYQSTVHHNP-  
MRMSPRIGLEPKDIIHSNLRMFWWERITRRFLAFAAIVALVFWAIPVA AVGTISNITFLT NKLPW  
LRWILKMPALLGLVTGLLPTILLSLLMFLLP IIRV FARISGEISAVGVEKWTQNAYFAFLMVNGFLV

TALASSATATITEIIDKPTSAMSILANKLPLSSNFYISYLVLQGFISIAGGSLFQVVGLFLYYILGTKW  
NFSGLGTVAWGTVFPIFTQLASITLAYSIIISPLILVFAFASFFLVYVAYAHNITYCFVEGPDAGSH  
YPRALFQTFCGIYLGEIVLLGIVVVGKGWGPVIVQVIVLLATIFAHVHLNLAFDHLLDVPLDAMRA  
VIV----DNKHAYDAP

>Canis\_familiaris\_E2RBB2

LQGLPFGGVPTVLALDFMCFLLALLFLFSILRKVAWDYG----RLLDADTS-  
VSSSVNGFCSWLTAIFRIKDDDEIRDKCGGDAVHYLSFQRHIIIGLLVVVGVLSVGVLPVNFSGDLL  
--AYSFGRTTIANLKSGNNLLWLHTSFAFLYLLLTVYSMRRHTSKMRY-----

KEDDLVKRTLFIGISKYAES-  
EKIKKHFEECTVLEARPCYNVARLMFLDAERKKAERGKLYFTNLQSKENVNPKPCG-H--  
EQVEAIEYYTKLEQKLKEDYKREKEKV-  
NEKPLGMAFVTFHNETITAIILKDFNVSSSLHNWTVSYAPDPQNIYWEHLSIRGFIWWLRCLVIN  
VVLFFILLFFLTPAIITMDKFNVT-----

KLNNPIITQFFPTLLLWCFSALLPTIVYYSAFFEAHWTRSGENRTTMHKCYTFLIFMVLLLPSLGL  
SSLDLFFRWLEA---

AIRFECVFLPDNGAFFVNYVIASAFIGNAMDLLRIPGLLMYMLRCRNVRHQAYEFQFGAAYAW  
MMCFTVVMYTSITCPIIVPFGLMYMLLKHLVDRYNLYYAYLPA-  
KLDKKIHSGAVNQVVAAPILCLFWLLFFSTMRTGALTGGLAFTFVVLVITIVICLCHVCFGHFKYL  
SANYK---S---SGDEPPL---

>Chlamydomonas\_reinhardtii\_XP\_001695096.1

-----MRLRPWAKRFFGPRRYAKD-----

TVLMGWIKPVMLYKEEDIIDEVGLDAAMYLRVVWFGMEVFFVLTLCIPLTLPNMTGSEIARFT  
NFDRLSLSNVSPGDEVMWCHMVAVYISAIFVLWRLRRTYNLQSVYLRLLFLGNAK--  
RGGPSHTVLVTDVPYQ----

MVAREFALYNIAAVNMIQDTSALEPLVEEYNQVMQSLEMAKLRKLRKA--  
LPVAEALDVKVDVAVTYWLAKLKYLRERIRTEQAVA-RK-

LAPSAFVTFNTRMAQGVASNSLHAHDE-  
TVWRISGAPAPNEVWWRNLPMTHPVRSGRYLILWILFWLMALFFMIPISAIQALIEVPKLA-  
VPVLGDIVTAPVISQLLQAIIPGLVLKIFMAIVPHILWAMALMSGATSMSEIDFGVVSRRFFLFQVIVV  
FFGCIIAGSFFNQLKQWVEDPASVISTLGKSIPMTATFFITYLFINGLGAKSIAFVRLPGFIIFWILS  
KRERMWMNQSARYGILVPDHTMAMLLGLVFCCMNPIVCPAALAYFIVASVGERYNFYVYRQP  
YESAGRMWKTVYNQIMVGLYIMLLTMFGLLAIKFKWVF-  
FLLPIIAAAVISHMATLSLYSRPWSVTALHDAEAEMNSAEKKEIADMYRNP

>Chlamydomonas\_reinhardtii\_XP\_001698593.1

-----  
PMLAISDADIIRSNGFDALIMTRILLIGLQMMTLMTVLGVGVLPVYYTRGK---

AGVLALMSISNLEKSKIL-  
VPFFFTYAFCIVCCFVLWINCKCYVQLRNAYFLCLATSAGAAAWRRLAQPLPLAAEADPNVAAQ  
LTRGSFLGLVPVANHDEADKLIYEWDMMAMQQLGERAAAASSRLA-----

KLRADVEKQQAQVVELEVRIEEARQRA-  
AQPTGYSYFALFNSSQDAQLLAQCRRVPPGASFDVMPAPAPDDVNWSALVTRGWERALRG  
TVFWIPLVITF---LIPIGPLQGATGAGSSSTNGLWW---

CETMLLRRAIVTGIMPSVIGFLWTFAMPQFLFFASNRRRPVSLNGVEREIQAWFWWYALLNTFIG  
AVLGGGIFSQVGTFLLEPGNMLQRVGTGVVNTANFFIQLVIARALFTNCKLIVFPHGSMFTSMF  
RSSAFIHQPPSLRSATLYNSMMSVMLFGFAYAVISPIILPCCWFYFLTGFISYRYNLVNFYERGY  
DSGGRMWPALFGQLVGLLVLEVLTGTVLLTNQSWELAAVMGTLTPALAYFWASCNRTYLEPL  
KHPPLVA---REPQGSVDPLVY---

>Chlamydomonas\_reinhardtii\_XP\_001699063.1

RAAGGVGPAADGCAIFGATCPALVRLLGA-----

LSYLPPVTILRPAVLVPGP-----WCFA-----

LLWGNPVLPCAAGLLTLGTAVRCWEALAAVRQLVASKPG-----KRSVLRPILPI-----

ADMARVP-----PELQSGPDAAAQFSALLASATLHAPGGAASAPPAPG-----  
AADVPLLTLTVKQLAPAYDALRVR-----HLAFIAYS GAAPPAEAIHALR---  
AALLWALVWEPRHKEPLW-----RLAVNGFTGFGMLAAWAAPCTQMTA-----GARVWD---  
---VVAEALRDVMPGLSQAVWIVCLA AVAALEYGQRLYACRDAADR TAE-----  
VAVVRRIGVEVIADF-WSRLAAFVGS A--  
VYGVRPVRVDLHLRTHLEVL YEQGLVLGPLAALRLWGLLQFAVRYGRARLLAAPPLTFAATVPS  
HSIALLLGLVFSCVNPLVLPAAAAHFLLSGLLERHSHCYVWAREYESGGRMWSQ-----  
-----

>Chlamydomonas\_reinhardtii\_XP\_001699584.1

QYQVSDNQVLDSL YINMVWGGLCMMGMILRGWLK---VFQRRQ-  
LQLPPLRRPPAKQIWNWFSPLLSVSDADIIRSAGYDALVLRVLQIGLQMFTFMAIFGVGVMPIY  
YTGAGLA-LGDLSRISLANLIPGSLVL-VFFFFCYLFSAYGCFVLWINCKGYVQLRMSYFLCLA-----  
-YYALFYNTVPYEQVDLDD-----  
EDVDPDGVVPVIDHDSVEKLI AAWDRAMWALTAAGCRKVKRVP-----  
EDEMNLKVTVKALEGQIEEERARV-RVPLGTAYFAFFNCSQGPAMLL-----  
SFTAEPAPAPDDVAWPNLSTRPWQQIPRQLGALLLSIIF---LPIGAVQGISNLDVALTNQLWF---  
CNPGI AKSLVTGVLPSVLGMVWSVMPHLLFMCSSSRRRKSLSAQDREMQAWFFWYSLFNTF  
LGAVLGGGVFSQIGVYLKDPSSLLEHIGKALPSTANFFIQYVIARAVFNNTLRFI WPHGQMLAAII  
RTAAFAHMVPSARAATFYNVILQIFMFSSAFAVAAPILPCAWFFFLT GFFAYRYSLLYIERSYD  
NE-----AWTPGIVLCTLTPALVFWRFCDRAYLKPLHHPPLLVA---  
REPLGRVDPLVYMP P

>Chlamydomonas\_reinhardtii\_XP\_001702312.1

-----QTVTRVLNSVIFMNGTLNGNSTIR-----  
VSILANATLVINGTFLYPGSNNTETDLFTDFDKYSLSNVEAGSPKMWAHLVSMYVVVIYAMWLIT  
RFNREAVLLRLMFLGNAK--RGGPSHTVLTVDVPGQ-----  
MVRSEFELEDICVVMNQNTALQPLVDEYNKVQQSLEMLQLRLKLRKK--AEPQL-  
WGKKVDAVTFWLDRLRYLKEQVLLQQVKA-NK-AAPSAFVTFKCVTG-----  
GGAPAPFEIVWSNLSMNIHEKSSRVVGLWVFWLMTLFFMIPVTLIQAMIEVPKLAT-  
VDGLGPIVTAPVIKQLLEAIPGLVLKIFLAIVIPILKAMAIMSGTTSLSSEVDFGVVKKRFFLFQVVVVV  
FGNIIAGSFFNQLTQWVEDPASVIPTLGKSIPMTATFFITYLFTTGFMFVKTLQFVRLPGFVIYWLL  
NAKDRLWMFYQYDFGR TVAEHTTAMLIGIVFSCMNPIVCLAAW TYFLATYLGERYNNIYVYRRQ  
YESAGRLWGT VFGQVMVGLYIMELTMLGLLAIKKFKWTP-  
LAIPLVIITIGFHISNSRIYNKPWSVPAL-----AEEANEVTKLYKNP

>Chlamydomonas\_reinhardtii\_XP\_001702326.1

--AAGSSSVLSSFLNLYICLGCFGAFWFRVTPWARRFFSPRRFATD-----  
NGWVSWILPVIRYREEDIIDEAGLDCAIYLRLRFGIFLFLGASLWCIIAVLPVNMTSGEIDRFTDF  
DKYSLSNVEGGS AKMWWHAISVYAVVLYTIWLLSRFNRESVLLRLMFLGNAK--  
RGGPSHTVLLTDVPGQ-----  
MIAREFALTTVSAVNIQDTGGLEPLVEEYNKIREELEMQLRLKLRKK--AEPKV-  
WGKKVDAVTFWLDRLRYLKGQIIEQQAIA-KK-VAPSAFITLKTRQAQAVSSNSMHHHNV-  
TTWRVQGAPAPFEVIWKNLALTLPIKSGRNWILWAAFVAMT LFFMIPVTLIQAMIEVPKLA A-  
IPVLGDIVTAPVVKQLLEAIPGLALKVFLAVVPIILRIMAIQSGATSLSEVDFGVTSRFFLFQVVVV  
FFGNIIAGSFFNQVTQFVKNPTGVFNILGKAIPMTSTFFITYVITNGLSVKSLAFLRLPGFVIFWLL  
SKRQRMWMYQYTDNGTTVDHTIVVLIGLTFCCINPIVCPAAMAYFLVTSIGERYNNIYVFRRRY  
ESAGKLWKT VYNQVMIGLYIMQITMLGLLAIKKFKATP-  
VLFPLLFFTIGCHISTLSLYRRPWSLTALHDAADLTPAEQREIADMYKNP

>Chlamydomonas\_reinhardtii\_XP\_001702328.1

-----LGLFTLTIVRVPWAKRFFAPRRYARD-----  
SFYLGWVKPIMLYKEEDIIDEVGLDAAMYLRVLWFGMELFFMLTLICIPLVLPNTMNTSGEIERFTN  
FDKYSLSNIPAGS AKMWAHVVALWLVTLFTMWRLREYNLQSVYLRLLFLGNSK--  
RGGPSHTVLTVDVPGQ-----

MVAQEFALYNIAAVNMIQDTTGLEPLVAEYLKIEQSLEMAKLRLKLRKA--  
LPMKIRALAKVDAVTYWLRARLKYLRRECIKIQQAVA-RK-  
IAPSAFVTFNTRMAQQGVASNSLHAHDE-  
TSWRIMPAPAPIEVVWGNLMMTHPVRTGRLWLIWVAFWAMTLFFMIPVTLIQALIEVPKLAS-  
IPVLGDIVTAPVVKQLLEAIIPGTC-----  
RVVVVFFGSIIAGSFFNQITQWVKDPASVISVLGKSIPMTATFFITYLFVNGLAVRSIQFVRLSDFV  
VFWILSKRERMWMNQVQFYGKTVPDHTIAMLLGLVFCCMNPIVCPAALAYFLVACVGERYNVI  
YVYRPQYESAGRLWKTVYNQIMVAIYIMLLAMFGLLAIKKFAATF-  
LLVPLIIGVLLSHLSTLTLYSRPWTVTALHDAAEMNSAEKKEIADMAVPP  
>Chlorella\_variabilis\_EFN53534.1  
--ATSGKSLAITAGIYAIALLVFIFFSWWRTTKLTRKFFSPKLYTPG-----  
ARFGAWVPKVLYMSEAEVIRCGGVDAAMYIKILRMGVEIFLIVSFFVLVIILPINCTGSEVDNFTSL  
DKTTISNIPRSPRLWAHAVITWVVVFFVYMCLWKYNKEALRLRIFYLLNQP--  
PGAESHTILCQDVPDGSVGMVEEERKEDLAAVHMHVHNTSALDPLVAEYEKLRLACTNYISL  
KRRGKE--MAPKK-WGVKVDAREFYRDLTELRRAIHEEQGKAQSN-  
VFPSAFVTFKRRTSQQVVGARTLMSEDL-  
SAWRCQAAPRAEIVWGNLGFRIWERSGRTLAMYGLYVAGMAFFMIPVAAVQGLLSMNSF-----  
-  
LDFVNSIPIAGAFLTGMLPGLALKIFLALVPMFIVMMNKFAGMVSQSQIDLGLVSRYFYFQVVTLF  
LGSFIAGTFANQLNQFINDPSSITIFGTSAPQTAIFFLTYVLLLEALLTGSLTLMRLVPLIIFWVKSrk  
ARLWQNQLMAYGVLVNDTMAFLLCLTFCTICPIIAPVGLLYFMVNYMVWQYQVYTYTPTYQ  
SGGLVWVRVFDQCMLGMVMFHLLMMAILGLKKSIGAPIFVLILLTFDFVFWVAVHKRFWRPQEC  
LSLISAADMKGKELDQEVSDRYLSP  
>Chlorella\_variabilis\_EFN53692.1  
GETVTASEVVTISIYVSAVGGACFLICWAI FRKPLR---IFLKR TLAQ----  
ARPPPNICFGYIPPVFFINDLEFVQTAGLDALILCRFLVLGFQIFLPM TIVCCAVLLPLCMTGT YVD  
TLVGIMRYTLSNIQPGSSKLWAPFVLSYAVLAWTGYCLIQHYSYAMLRL LH----  
VWVCVEQYSVLFTIAPPKGAEFVLAQALQDDSFTQLVRVYNHKAVDKLLSQHEAAASHRDGK  
AAKAAARLE-----RAEAEAKAEERVGELEGQVEVARQAA-  
LEQPLGTAFILFSDQTSAAALAFVQAS-----FVPAIN-----FNRMLRALYVIPFLV LVI---  
VFPIGVL TGLTNLSTAVTNNLWY---CEG-----  
AGLLPSIISMTWYVLPMAFFSSQEARHLALSDLDHRVVILFFCFDIFNTFLG SVLGGAVFQQIG  
SLTKEPGYWLQMLGAALPSASTYFLNYIIHALCTNFFRFIWPHEGTVLFVIFRHTMIR TAPSF RG  
GRHFGSFQLIMAMALSYAVIAPLVLPAALGFFLTAWVTWRYCCIF YERSYESGGRIFETLFTLM  
VWTLVLFSLFTSLVLASKKSYTASLILFTQPPLLLVYHRRVSLAIGHYARLLPLATL---  
SAPRATPDPA AFLPP  
>Chlorella\_variabilis\_EFN54682.1  
STAISGENLITGMWVNLILGCLCYLGFVLF RSMRG---FYHARLLVS----  
RKPPQQRLWGWLLPVFGVTDEELVHSSGLDALIAVRIISFGVTLFLPMTILGTAVLLPVNYTSDY  
YTQTSVFM RMTISNIRQRSPLLWIHFTFVYLVNFWASWLIIEYYKAYIALRQTYLVR CALAVNASL  
FTCLVMDMPYAMY NKRATEMFSEADFD SIIPIYPTASVDKLAHKWDSKVAVLERHHAKRCAKL  
K-----QRAGSNLLACKHEKEGLGDIAAERDAV-SDLPSTCF FATFKSQQAAA IASQTNLN--  
PIMLFSVHPAPRPDDVNWPALQRSWWQRTMRPLYALPIILFFM---  
LLPIGMFTGFAQLTVALPASRWY---CSD-  
FMRNALTSLAPSIVLSIYMVFLPVMVYAAQEGQHVSLSALDRRCADLFFYWDVFNVFLGALFG  
GTVLAELKTFLQDPSYIWSALGSAIPAASNFFIN YVMYRALVMSAFRLLYPHQAIMPAILKWKLM  
EVPPRNCRYGRDIGIPVLMFVMVCSMCIT SPLILPFGLLYFVGLWAVWRYQALYVYQRQYESG  
GQFWPLVAHKVVGCCQFIMVVFTACVLLFKGGYTQAALLITLPIYLLRFDNYLTKRYDDLVRQVPL  
AVH---SAGRSTVPSDIYTPP  
>Chlorella\_variabilis\_EFN57874.1

AETLTSRQLAAAASAVSAGGAFFLALWAFVVRGPLR---IYQKRTILH----  
ARPPPHRCLGFLAPVFLLTDAELLQTAGLDALMLCRFLALGLQVFPISALCCAVLVPLTRTGTA  
VEDTAELMRYTLSNVEEGSPKLWAPFALSIVVLYGTGYVLLMHYKSYALLRLLH-----  
VWAQASQYAVLWTVIPPGPEADAILARSLKEQSFSRLVRVHDHLAVDRLLAKHEDAATCRDAS  
AARAAARLA-----RAEAGLAKWQGRVEELEEQQIVAARQHA-  
LARPLGTAFILFRTQAAAMMAARLESS--  
VLPNFSVQLAPGPDNINWPALWTPWLQRVWRGLAVIPLLAIVM---  
LFPIGTLTGLSNLNTAVTNKLWY---  
CQSALMKELLQGLLPAILSTCWTYVPLAFYFLAQQQRHLALSDDLRRITALFYCFVSNTFLMS  
VLGGAVFQQIGSLVTNPTKWLQLLATALPSASIWFM DYLVVHALAINVWRFAWPHDGTVLFVLF  
RRCMIRSTPRLSRGRHYGAFLLIQIMALSYAVIAPLLLPMAAFYFLTAWVTWRYCVLHFYERSYE  
SGGRIFEILFTLVVWTGVLFTLFSSLVLASKKAWSPCLLMATQLPMLYVYHRKVQLSVGHYARV  
VPMSTL---QAPKVEVDPATYLPP  
>Clavispora\_lusitaniae\_C4XX35  
NSSTSASQLLSSLIPLNLIIFAVFILGFVLL--RKKQARVYEPYRITLETK-  
DLKPAESGLFAWVSNLLKRPQQYLIQQTGPDGYFFLRFLFEFAFICLIGCFITWPILFSVNATNSN  
--H-KQLDMLAIGNV---  
KQRYAHIFVSWVLFGMVIFIIYREL VYYTTFRHALQTTPLYDSSLSSRTLLLTELPESAMTEADL  
RTFF--  
PTATNIWYARDYSKLEKLHKERAKLAKKYENALTSVLTAKVKKRPTHRLIGKKVDTLDYGAERL  
GELNSEIKKAQGEHKTNLQLPSVFIFFPSQLELQKAYQAIPYNPE-  
LKKCGRSGIAPDDVWENLSLTSTKRRTKKVLANTVLTVTIIFWSIPVAVVGAISNINFITEKLKFL  
KFINNMPALMGVITSLLPTVALAILMSLVPPFIKKMGKVSGLTIQDVERYCQNWYYAFQAVNSF  
LVVTLASAAISSIQSIIDKPDALTALKLLAQKLPKASNFIYSLCLYGLSVSSGLLFQMTALILAQFLGR  
KWNYSGLSPFFSILYPAYMLVSLIALAYAIAPLILGFATITFFLIFTAFMYNFIYVLQNKTDARGR  
NYPLALFQLFTALYLAEATLVAMFVFGKNWACVALEGFWILVTAVSHVYLKWKFLPLDTPVISA  
LKYAIEYNPEFVKTAYEDP  
>Clavispora\_lusitaniae\_C4XXZ0  
ASGTDVSVLMKHLLVSLCICLFEILCFSYL--RIYLKNLYQPLVF--SI-NAD-  
DVQSVFGWLIPTWRKNTNDYM-RSDLDSYFFIRFIDLLL FYSTCGILNFAILVPINFSGNS--  
TATGLDKLSLSNI-  
SKANRLNAHFVCTLVSIAFFHWALFREMQRNIFEIRQVYLTSTSHKLKESSRILLVGDVPEAYRNID  
KLQSLFKFGGLEEVWFTDDYTKYERQTEKAQDALDTFEEAQIRFLQKKIVKIPLLERFQKKIPILE  
FCVQTLADTNDILLQRLQDIKDFDKKEKVLKFRSQESMHMAHQTLSSKEI-  
WSFNHSTKVHPDDIMWDNVRKSTFFTSVEKYFICVISILAIALYIIPVSLITLLSQIPVIIKLPFMIWL  
ASTPQVREVLSSLLPAILLSILTECQLQVFQILVHWKWKWVSGSEKELDLQQWYFAFLFIQHFLVV  
SISSSLIVVVQAVEKPAIPIMLAANVPKSAFFFFKYLAVKAFAMCGGSFLQISRLTKHWLYYYPK  
KKLHDLPKISWGSYIPLISVYASIGITYCVISPMISLFMIFIFSLILLYKYALDEVYHNPKDTFGMLY  
PRALFHLYSGIYCLEFCMIGLFFASRGL----VMILVLLLTIFGNVYVHHTHFGAHFEHVPVLNEEES--  
-----YLHP  
>Clavispora\_lusitaniae\_C4Y5W1  
YGPSQSRVFRQLALSILAIGLSSFLFCFLRRRWPH--MYAVRTR-----  
DDLFKWVGAVLLISDEEVLEYSGLDAYVVLAFFKMGIKIFLLLALGMFVLSPIRYFTGNID-  
DNVSWTTMAK-EEFPRYLWVYPLFTYLF SIIYVHQLFAYTKLVIKMRQKYLASQ---  
NSITDRTIKLDGIPKRLIRKNDLKRFIEDGRVVDIKLIYDWSVLEDLFERRKQIISRLEHY-----  
RVLPVIK-----RKKIDQGARELVEVDRKIRNIRNK--DIRILPSAFITMDSVASAQMAAQTVLDPV-  
YKLMVSLAPAAKINWKNLKLSSYKLYNSYMITSLIVLSYSVFFLVTTLSTLIDVKTITKFWPAL  
GNLISKSWLSTFVTGILPPLLFSLMNVSPYLYRSLSQMQGYSSSSEVELSSLSKNFFFFIFFILFL  
VFTITGTLWDYISSIGDT-  
TRFASQLASSLKKLSLFYVDLILLQGLAMFPVKLLQIGDFVLFKSLYRFYTPPVDFGLNLPQ

HILIFIILIIYSVVSTKIVTSGLVYFLLGFFVYKYQLIYSYVHPPHSTGKVVPMIFRRLIFGLIIFQLFM  
CGTLALEGAILLSIICTPLFLVTMAVSWNFEEKYLLPLHNFIALRAISPVTVDEEREQFTDYTHP  
>Clavispora\_lusitanae\_C4YBD3  
AQGTSTSAVLSSLVANLILCGIFVGCFLVL--RLKFKRIYAPKSSFDLE-  
EKKPEPKDPVRWIFILLTKPHSFIIQQCGLDGYFFLRYLFIFCLTFTGGIL-IWTVLLPINAVH GK--  
G-NGLDQLSISNV---  
RKRYAAHAFISWFFYGTVIYIYRELFFFNSFRAAVLSSPRYAKKLSRTVLFQSVPAWLDEKQ  
FFKLF--  
NGVKRIYISRNIRLLNHKVRQREDMAIKLEAATSKLLKTAMKKRPRHKVFSKKVDSINYRQQLP  
LLDNDIYRLQKNYRKYRPNKNSIFVEFENQYMAQLAYQSVVHHNP-  
LRMSPVTGVEPGDWDNDMRLFWWERITRKAIAVASITAVVIFWAFPVAFVGVISNINYLTKIH  
WLRWINDIPWILGVITGLLPTVMLSLLMSILPMFIRGMMAKVAISAQEVEEMFTQSAYFAFLLVNG  
FLVTALASSATATVTRIIDNPSSALSILASSLPKACNFYISYLILQGLTVAGGALFQVVGLFLYYILG  
KKWAFSGLGTVAYGTAFFQFTILAIITLAFSIIAPMILLFAAVAFALIYIAYCHNLTYVFEVGPDSRG  
AHYPVALMQTFTGIYIGQICLLGLFVVGKGWGPVVEAIGLGTIFAHIQIKAANRLLTVVPIDAM  
KSLIQ----DNKHAYEQP  
>Coccidioides\_posadasii\_C5P9N8  
QSAFQERAFWASLGTSLGVTGFLALLFSLF--RPRNSVYAPKLH---  
DRKHAPPPKGMFAWVTPIIKTKEGEMLDKVGLDATVFLRFTRMCRNIFLVLSLIGCAIMIPINVTG  
SGG--LSTFTTMTMPMYVTDQK-  
VLWGHIAACAWGIDAIAAYFLWHNYRAMCRLRRQYFMSTDFQQSLHARTVMVTHIPAAYRTDEG  
LLRLTDQASIPRASIGRNVKELPDLINEHERVVKELEEILAKYFKNPDPKRPTCKPTPEKVIDAIDY  
YTVRIRTLAEIRHVRESI-DKRAMSYGFASWESIENAHVVAFAARKKHP-  
QGTNITLAPRPNDIIWENLALSADLRRKRFMNIVWSTILTVVWIAPNAMIALLADLSHLGLVWPA  
FRRSLDRNKVWSAIIQGIASPAITSLVYLVLPIIFRRLATRAGKSTKSARERHVLHSLYAFFIFNNLI  
VFSVFSAIWAFVATVIQEAKNFYVNVMTALCKVSPFWVTWLLQRNL-  
GAAVDLMQLINMVWTFIARRAIEWTAPPPFDYASYFNFLFYTTIAFCFASLQPIVLPVTALYFAV  
DSWLKKYLLLYVFITKTESGGRFWRAIFNRMIFALILANFILGLVVKAKGSWNMVFALVPLPVLLL  
GFKWYCRNTFDELLYYHRAILS--KK-AAERLSSRFGHP  
>Coccidioides\_posadasii\_C5PI64  
NASNSASGLVSTLLPTLVISGAMLLLFVIL--RRSERRQYAPRTYIGAE-  
QERTPAPGFFGWILSMLKLPDITYVLRHHSMDAYLLLRYLKIATSICLVGCFITWPVLPVNATGG  
G--G-VQLDILSFGNV--  
NLSRYAHTFIAWIFISFVFFMVTRENIYFINLRQAYFFSPLYSGRISSKTVLFTAVPDEYLDEARI  
RKMYGEDKVKNVWLVPNIDQLEKVEERDGAAFKLEGAETKLIKLATSERPTHRLIGKKVDTIN  
WARGEIERLNPEIESLQEKLREAHEISSVFEFYTQNDAAQAAYQMLAHHQP-  
LHMAPRIGLNPEDIWNSNLRIKWWELIIRNAATIAAVVALIIFWAIPVAVVGAININFLTNKVPFLAF  
IKDCPVILGVITALLPSILLAVLMALLPIVLRLLARLGGVPTAAAVELRTQNFYFGFQVVQVFLVTTI  
ASAASSAVTKIQQPQEAASLLAENIPKASNFYIAYFILQGLTFSSGALLQIAGLVISKILGTMYKWS  
TLAGMGWGTVPVLTNLCVIAITYSAIAPLVMGFATIGLYLFYLAYRYNMLYVTNANIDTKGMVY  
PRALQHTTVGCYLLIVCLIGLFAIGTALGPMILMIIFGVFTIYHYSLIQAVTPLLNYLPKNLETED-  
TYPPEIEKNAYYHP  
>Coprinopsis\_cinerea\_A8N6F5  
SQSNSTAFVTALAVNAGLLAAEVLVFLIL--KTKLWRVYSPRAY--LP-  
DKRADEGGLWRWFPALLRSPTKEIIQKNGLDAYMFLRFIKLLVWIFLAFTIVTFLVIIPADAVNIQS-  
T-  
TGVERISWSNVPRDQHRFAAHVIVVYVLTAFVVYMIHREMHHFVQLRHQFLLSPSHSKLAQSR  
TVLITSIPEELGNEQDIKTFASFGGVDRVWLYRDTKTLNELFERRQELCELLEAAESALLKQATH  
KRPMHRTVGTQVDTINWCKEEIAKINVSIAELRKD-----NS-----  
EHKMDAHPKDIVWNNLDDGALEMKGRYITSWMATVGLIIAWTFPVSFIGTLSNLGELCTDVKWL  
AWVCDLPVVRGLIEGVLPPGLLAVLFAALLPFILQALAWYECIARYSLISVSVYKRFYFLLIHGFLV

VTLTSGLTNVTQGLA-----  
GAGNALAQFVPLILHYVRKWAYATFMMPAADFGVVLPRLSLLATIAFAYSVLSPLINLLALLSFG  
MFYIAWKFLFVQVFQDETETGGMYFPMVGNLFGVLYIEHICLAALFFMRAAVVKAIFMLVLLGL  
TAVAQLFMSNSFDHLIHYLPMSLATKK-----AADDHAFDHP  
>Coprinopsis\_cinerea\_A8N733  
SRTLAPEAVASQVALMSIVSIVTVLLFNLL--RPKNKIIEPKVY---  
EGNKPPPRSHLFGWLPPLAHTKEPELLDKIGLDAVAFLRFNRLLRQLFSGIVLLTGAILIPINVTYN  
LKN-RDLLSMLTIRDVQG-D-  
FLYAHVATTYLITILIMGVVWYHWTQMILKRHWFRSPEYLSFYARTLQVIHVPKQYQSDNGL  
KEIFDQYPTTSVHIGRKVGLPELIEYHNQTVREFEQILVRYLKG-  
GSKRPTIRIGGVTKDAIDFYTAKLRTEAAIEEYRNQI-  
DTRAENYGFASLAAPVYAHIVAQKLEGKHP-  
KGTTISLAPNPKDIVWSNMNKTGELARKKLIGVLWLVLCFFNTLPLFVISALANMDA-----  
QWFESSKTFIVSGVLPATVSGIFGFPLIVMRWLTKYMGALTYSRLDRAVIARYFAFLIISQLIIF  
TLIGVLFNSVKEIKAIGKLPGKIHTTYINQASYWLTFFYPLRGF-  
LVVFDLAQIINLWLSFKTHIREWTQPPEFQYAVVYSNLLFMSAVGLVFAPLAPLVALAACCVFVW  
MGSWVYKYQLMFVYVSKVESGGRIWNVVINRLLFCVLLMQSLMVLITIGLQKRSLWLSALPPVL  
FIIAFKFYINAKFIPAFRYFTPTTEE--DH-KANKLEKRFQHP  
>Cryptococcus\_neoformans\_XP\_568337.1  
LTQVSVRAVGSQFALMAAISMATLLAFSFF--RPREK-----KIY---  
DYEPNPPNGFFAWLSPMIHLKEEIIANIGLDAATFLRFLRMLRNIFTITSIIVVALLV-  
IDIVYNLKY-RNALSLLTIQNVSG-N-  
WMWPAALAAASYVINIVAMYFIWFNWKAMVRLRKGWFRSPAYQTKIYSRTLMTVTHVRKDFRSDA  
GLLSLMDGPSIDCTCIGRREDFPKMVDDHNEAVQELEKHLVKYLKG-  
GKKRPMIRKGGVKKDAIDYHAKEIKFLRDRIDAKRQAI-  
DSLGENYGFVTFKTI AEAHRIARTHARGKLGK-  
EGAELQLAPMPHDIVWENISKEPAELGSKNTFGFIIIGIVCFFNTLPLLVSLLANLSS--  
TVYVTFADWKDAGWTFMSVSGILPSVVSALFGYLLPIIRKISKYQGAPTRSRLDRAVTARYFFF  
MIISNLVIFSLGCVVYTAIARIVVQGGIPDQIQGTYYVQQST-----CF-  
LVIFELIQLIKLAMVSIRRFIREMTKPPYFEYAIVIVNLLFITAVGLIYAPLAPLVAMGACCVFWFSSV  
VYKYQLLYVYISRAESGGRMWNVYNRLLACCVLMLQLLMVLTTGLIRRWIDCVAAAPPLLLIIAF  
KIYISRTAERQFRYYEASPEE--PT-KQSEVENRFLHP  
>Cryptococcus\_neoformans\_XP\_568344.1  
NYTAAYSGLLDNFYLTVAIAGACLVGYEITRKDPGSREIFQPK-----  
RWPLAWIGTALKFREQDMPAKCGLDLTLHARFLRGCFFYTLQTLIIMPILMPLHIFYS----  
STSMRLRASISSSGSRWLWVHALLIWWVSIWTCTVLWITWGGLAYRRREI-----  
CEGIKRFRTVMVLNIPPDMRDENVLQDYFDHSSVEDIVLVRKLGVLINLRSRREEVLKLEIAHT  
ELAKRVLHSHKPLS---QNPPLIDYLTTKLAYLTHLLTESLSK--  
SYATASTAFVTRDAKTARLVLKILDH--  
PKRACKTVPAPDWDLLWPRLKSVYRSEFVRGWAVYLGVWAFTLAWIFPVSLCALASLTNIA  
GFIKPLKAFLDNNKAASAITSLAPVILVALLAICPILLVIANKAETIMTRLGVHNSVLERFWKFLMV  
NGVVFFAIGQSAIEAYLAFQTN--  
DFLPIVASAFPTAAPYFASYILLQVAIQPFVEVFRFGPAIVYVFGTRRRSRTQYPTFSHFSQLPQQ  
LLAGAIMHLMFLLNPLVIAFALVYFGACYLVWKRQFIYVYGRLYEVNGR-----  
RSCIRIQRYSM DALAYAKGHAIATGVLFALTLISKIM-----  
>Cryptococcus\_neoformans\_XP\_568746.1  
VQTSTTSSFVAALVAGITVGAFSALWLVLHGRKDLQRVFPRTI--LE-  
SKRPQPSGIIAFWKTLIQTPDQDIITSNGPDAYFYVRFLKVFFQMLIPYEILTCAILIPVSVISPNQ-  
G-  
TGLNKLTFGNVETDQIRHVAHFLVAIVLMSWTVYLIWREYNHFVDVRQTWLTTTPQHLSLARART  
IAITNIPDSLNSSTGIKELAGVGGVRRVWLTRKCKNVEKVKERDAECARLEGGVAKLQKRAAK

KRPSWKQIGQK-  
QNLETSPDYIHEHNVKLDELREGIEDLPQGNTAFIRFSSQFEAHAFKASKTDK-  
SNMHIRIEVVPEDIEWSNISMSPWERHARTIVSWCLTVGLIIVWAIPVAFVGMISNVDTLCANAS  
WLAWICELPAALGIIKGVLPALLAVLFMLLPVVLRLMVKMQGEIRKSDIELKLFSTRFWLFQVIHG  
FLIVTLASGLINALGNLGDGTAGEVPTLLATKLP GASIFFLTFILTATLSGAAKTYARLVPWIMYLLR  
DIVYLKYMDSFTWSTAFPPTCLIICVTIVYSVIQPIITVLALVAFILLYCANKYVIHWCAQDAETG  
GLYYIKALRTVFVSLYIQGVCMAGLFFLSTGLGCGAVMCMIVCIAVIQYLIFVHNTP---  
SVPHSSSEPK-----GFHNRAFDHP  
>Cryptococcus\_neoformans\_XP\_569104.1  
AQSASTSSFVTSLIVNSALAGGELAAFIGL--RRWLKAIYEPRTY--IK-  
DAQAPAKHIFYPLWQIITSDPQEILHKNGVDPYVVFVRFLLIMMAKATIPIWLLSWIVLLPVDTANSH  
VLG-  
SGLDRFTFGNVPDKTSRYWVSHLVLVYIFDFWIIWLLWGEMKHWLVIRQRHLINPSHSRLAQANT  
VLVTGIPKHLSEEKLAQLFSGGKRIWLNRLKEMPNIHDRRNALQKLESAQVSLIKYALSK  
RPTLRIIGQKVDTIEWARKEIAYCTAELARSREQQDKYPLNSAFIHFNQIAAHMAVQCLAHNQ  
P-  
YAMNNRIEQSPANVIWRNLSLNQYERNVRQAISWAATFGLILLWATPVAFIGALSNTTTLTEKYH  
WLAWINGTSVLQGVISGILPPVLLALLMELVPFILRQLAAFEGFSPRTEVEINLMTRYFLFLVIHTF  
FIVTLASGLISSIQGFADNPGSAATTLATQMPTASTFFITLILT-  
QFTGTMGSLLRVNNLLLYVRIIVFTRYRLNRPQFGETFPKITVYVVMIAIYCVISPIINGFSAAFFV  
FATLVYKYLVIWVIQPSQDTGGMFFPKAITHVFVGLYVQVCMAMFFLVRCVAQGALMVVLIV  
TIAIYTVIVSYSPKSSPLSLARYSRKLDDGNDPNAFFHP  
>Cryptococcus\_neoformans\_XP\_569106.1  
-----  
VYLLFLRLLKYLFSAMSVLAGLLAITNYLNTQTTYIDNPQLLTAANVTSNGL-L-  
VHISFEWIVTMMIIVFAFKE-----  
-----KLEIEELQDRIRQGQVD-----TITSAFVTVPSAKQAREILKNVKD--  
DMKGYHIQRAPRSHNVLWKNLEKDVKSRSRSHAIIGKFALVIICFVNTIPLMIVTVLANLGTLEDSS  
EIW-----  
AIFTVLAVLPATISAMFSYILPYIMRRLSRWVSGALTRGQLDKAVIRQLFIFQLVSNFIVFSLGCV  
YETYLTISEDGSTVPAKVTQAYISESLYWLSWYPIRSV-  
VACLQLLQIPRLIKTPQLLLAEVAQPENFEVSSYTNLFLLLSTRCLMYAPLAPIIVICAAIYFWALY  
IHHNNQLKFVF-  
DSKETDGKCKWILINRVLIATVFMQLFMVLTCTLKTQSAAMAVGAGLPVIIFLKMVLRHRYHPD  
GEVFSQ-----YIDKYEDDDTRHWAP  
>Cryptococcus\_neoformans\_XP\_570388.1  
-----VYMGRTLFSF-----  
NRFFGWILPTLKTSEFTVLQTVGLDAAVLLHFYRMCLSLFGVVSALLALVLIPLNLFRRHGSTDRS  
SLYDLLLL--PTTSS-T-IHLIFTYLFSTLSFFHKNFHSFVLSRQAFLQLI---  
HSISARTILVTKLPTHLRGDRALAEYFEAFNVESVNICRDVEPLQRGLEKRTLALTKMEEAWAD  
WVGNPARPRPTF--FGTKVDAIEHWEKKFNAADEEVKEMRRTG-  
RFGATHAAVTFEDARDAQVACQVTHYPH-  
SQAVTTPAPEPRDIVWQHVSMSIRESQIRDFIVMGIMVGLITWIVPVSSLATLMSYEEIKKIMPW  
LARFIGSSRLAAIVQNSLPSLALITFNGLLPFLLE-----FTRLTLDR---  
SRYHLFLLISVLLIFLLTSTYWALVRDLVDTMPKIKEKLARALQNVRFMVSVMMLQALGLMPLQ  
LLNLGPLFSLALARAYAEANAPPMLNYGWVYPQALLVFTITLVYSVMSPLILIFGAIYFAMAYLVF  
KYKLLFIYFKPYESNGEAWRITFARTLWALIFQLFMTGLFSLRITYFWASAIMVPLIVYTLWKSWM  
MWQDFGPLSEYLAISSICEV-----NTGRRRYAHP  
>Culex\_quinquefasciatus\_B0WVM3  
LLLNLYEGIPETLLLNVISWFFLIMLFTLLRQQAWDYG----RLLSHG-----  
RGFFSWILATWRLTREQILTHSGPDAVHYLSFQRHLMLVMSIMTFISIVILPINFSGELI--



RNSFGHTTISNLEPDGGVMVHVFFAIAYVPMVVLIMRRASGRNAF-----  
KTAPTRTVMATNVAQPDCDKNAIRTYVQQVGIDDIQLAYNINSLIKAAEEYERIVDARIYCEVHRN  
RDREQAKLSC---ESVDALEYKDEEARLAGQVSRLRASA-  
LNEPLGIAFITLNSAHEAQHVILHFK---  
PGTDWDLSFAPAPSDIFWEHLSVDTAQWYCKWITVNLVFLFLFFLTTPVIIVNMLDTFSLT-----  
-----  
KKISPLVSEFLPTLLLLWSLSALMPVIVAYSDTWLSHWTRSRQNYVIMTKTFGYLLFMILILPSLGL  
TSAEAFLEWTNE---  
TYRWQCIFLPDKGAFFVNYIITAFIGTALELIRFPDLICYIWKLAPHIKSILITFPFGIHYAWMVMVF  
TMSTVYSLACPLIMPFAMTYILLKHFVDKHNLFPAFAPSNGSGGKIHSTAVTMTKFSVILLLSIMA  
ALAGVREGRLNVRVAVLITALVVTLVMFT-----FMSPKKC-----PSHLSY---  
>Danio\_rerio\_A4QP59  
LKGVNFGGIPVVLLDFTVFILLISIFTLIRRKLWDYG----RLETD--  
SSMSVKGCCSWLTFIVNMDELTVQERCGVDAVHYLPFQKHLVTLIIIICVLSVSIILPVNLSGDLL  
--PYNFGRTTIGNLQHDDKLLWLHTVFAVLYLMITVFLRRYTSKMKG-----  
TKREIVRNTLFRPIRPTSTDDS-  
IKTHFMECHVTSVNLVYDVAKLIDVNKNRKRKRAEKNLRHYNRILQQLGRNPRPCS-H--  
EEVDAIEFYSSQEAALHEEEVRLKQG--  
ELHPLGMAFVTLQNEYMATYILKDFNASTELGKWKVNYASHPHNIYWENLSVRGWRWLLRCV  
LLNTALFVLLFFLTTPSIIISTMDKFNV-----  
MLNSPIISQFFPTLMLWTFALLPTIVYYSTLGEAHWTRSENMSMMYKLYTFLIFMVLILPSLGL  
TSLAVFFRWLEG---  
QLRFECVFLADQGAFFVNYVIAAALVGSMEELLRLPGLLYIVRLAKYVQNQAYEFQYGAMYG  
WTLCVFTVIMAYSIVCPLIVPFGLLYLLKHLVDKHNLYFAYLPA-  
RLDRQVHLGAVNQALAAPIICLIWLYFFSVLRTGFMTGTSLFTLVVLCITVFICISYTCFGHFKYLS  
PNYN-----CSPSHSY---  
>Danio\_rerio\_B0R175  
LQGLPFGGVPTVLAINVVLWLILLIFSLRKAADWDYG----RLLKNDS--  
DSSPSMGFCSWLTSYHMKDEEIRSKCGIDAVTYLSFQRHIILLMMVVCLLSLTIILPVNLSGNLL-  
--ENFGRTTVVNVPAQNIFLWLHSIFALLYFVITVLCMAHHSSRLEY-----  
REDEKVARTLMTSIPREISDPGLITKHLHECTVTDIHFVQKLMKLDSEERRKAMKGRLYFTT  
KAQKNGRKTHTPCA-Q--EKVDAEQYSELEEKLTDEFNAEKNWI-  
SMKRLGIAFVTFRDERMTAVIVKDYSRSSVVRQWDVSYAPAPNDIWIENLSVCGPRWWLRCIL  
LNILLFLLFFLTTPAIIIVNTMDKFNV-----  
RLRNPVITQFFPTLLLWAFSILLPFIVYYSSFFEYHWTRSGENQVTMHKCFLLLVMVILPSLGLS  
SLNLFWRWLET---  
DVKFQCVFLPDNGAFFVNYVITSSLIGTAMELLRIPALLVYSLRCLIHVISQAYEFQFGLEYAWTM  
CIFSVSMTYSITCPVIVPFGLLYLVLKHMVDRYNIYYAYTPT-  
KLNQRIHAAAISQVVVAPILCMFWLLFFSVLRLGPVQPITLFTFITLLCSIAFSCFGFCLKLRADR  
SSYQ-----SPAHSY---  
>Danio\_rerio\_XP\_002664275.2  
LQGLPFGGVPTVLALDFMCFVLLCVFSFLRKAADWDYG----RLLDADTS-  
VSSVNLGCSWLTAIFRIKDEIREKCGEDAVHYLSFQRHIIGLLVVVGVLVSVGIVLPVNFSGDQL  
VEAYSFGRTTVVNLKSGNHLLWLHTIFAFFYLLLVYSMRRHTSKMHY-----  
KEDDLVKRTLFIISGIKYAEE-  
SEIKQHFCEKCVLDARICYNVAKLMSLESERKKAERSKKFYTDLMSREHINPKPCG-H--  
EQEEAVNYYTKLEAKLKEEYREREKV-  
NTKPLGMAFVTFQNEAMAALIKDFNASPQLHNWTVSYAPDPQNVYWEHLSISGLNWWVRCF  
VINCFLFLLFFLTTPAIIISTMDKFNV-----  
KLNNPIVITQFFPTLLLWCFALLPTIVYYSAFFEAHWTRSGENRTTMHKCYTFLIFMVLILPSLGL  
SSLDLFFRWLEA---

TIRFRCVFLPDNGAFFVNYVIASAFIGNAMDLLRIPYFLMYMIRLCRNVKHQAYEFQFGAAYAW  
MMNVFTVVMYTSITCPIIVPFGLMYMLLKHLVDRYNMYAYLPS-  
KLDKKIHSGAVNQVVAAPILCIFWLLFFSTVRQGFAPTSMTFFVLIITIIICLSHIVFGHFKYLSA  
NYK-----GSDQQQ---

>Debaryomyces\_hansenii\_B5RSZ8

EEDNSVSQFISTLIPTFVVAIFYLTFVNI--RKKQQRVYEPRNVVETQ-  
DLKPGEAGFFGWVSFLLHKPETYIIQQAGVDGYFFIRFLFEFAAICLMGCCILWPILFPVNATGG  
N--N-EGLNTISYANV---  
KNRFFAQIFLSWIFFGAVLFLIYRELVYYTTFRHALQTTPLYDSLLSSRTMLLTEIPENLLKETELR  
GFF--

PTATNVWYARDYAELTKKIKERSKLTNKYEGTLNKTISKAIKKRPSHKLIGKKVDTLNYCPERLG  
ELNTEIKKDAQHNANTQIPSVFIEFPTQLELQKAYQAIPYNKE-  
LGSPKRTGLTPDDVIWENLSLTPTKRRTKKIIASTVLTIIIFWSIPVAVVGAINITFLIKVAPWLEF  
INNMPKLGIIITGLLPVVALAILMSLVPPFIKKVGVSGCMTVQQVESYQAWFYAFEVVHVFLV  
VALCSSSISVDPDVEDPSSLMPLLARQLPKSANFYIAYLCLQGLTISAGLLVQIVALILAQFLGKK  
WNWNTLGQPFWSVIYPPYELLCVIAFAYSILAPLVLGFTFVTFVFIYCAMYLLVHVLQNKTDAR  
GRNYPALLQLFVGLYLAEICLTAMFVFGKNWAAVALEGIMIGVTALCHIYYKWKFLPLWDIVPV  
SAIRHAIEYNPGFLRNAYDDP

>Debaryomyces\_hansenii\_Q6BLR7

ATPTSTSAVITTLVANLTLFGVFIGFLIL--RIKFKRTYSPKVSYDLE-  
EKKPDPDRPLRWIYILLMKPDSFIIQQAGLDGYFFLRYLFGIIFLFGIA-MFAILLPVNATNGGS-  
A-TGFDQLAISNI---  
KNRYFAHVFMGWIFYGAVIYMIHRELFYNSVRCAALSSPKYAKKLSSRTLLIQCVPTMLDEK  
QFLKIF--

NGVKRIYVTRNARKLEYKDRLRQNMVTKLEKAENKLLKSAVEKRPRHRSFSKIDTINYCREEIP  
KLDKEVKSLQKKYRTYQPKNSIFVEFEDQYTAQLALQSVTHHNP-  
LRMGPVTGIEPSDVYWNLRFLFWWEKFFRRLFACADVLLIIFWAVPVALVGVISNITYITKVLP  
WLDWINNMPQLLGIITGLLPTAMLSLLNTFLPIFIRYMAKVAGCPTLQSIETYQDAYFAYLMVNA  
FLVVALASSAVSVVEKIIDNPTSAMKILATNLPKSSNFFISYIALQGLTVSSGALLQIVGLFLYYILG  
AKWNFSGGLTMLWGTTFPVYTNLACIVLAYSIIAPMILIFACIAFFLLYIAYCYNLTYVFVESPSDR  
GMHYPRALMQTFVGLYLQVCLLGIFVVGKVGWGPVQLQAIISLGFTIMTHIYLRDAFHLLRVIPID  
CMKPLEV----DDKHAYDSP

>Debaryomyces\_hansenii\_Q6BWA0

AADTSVSTFISTLIPTLVIAIIFYLAFIGI--RKKQQRVYEPRNVVETP-  
DLKPGEAGFFGWVSFLLHKPETYIIQQAGVDGYFFIRFLFEFATICLMGCCILWPILFPINATGGN-  
-G-EGFNILSYSNV---  
KNRFFAQIFLSWVFFGAVLFLIYRELVYYTTFRHALQTTPLYDSLLSSRTLLLTEVPENLLKETEL  
RGFF--

PTATNVWYARDYTELTKKVKERNKLTSKYEGTLNKTITKAVKKRPSHKLIGKKVDTLTYCPERL  
GELNTEVKKDAQHNANTQIPSVFIEFPTQLELQKAYQAIPYNKE-  
LGSSKRTGLTPDDVIWENLHLSKRRVKKIIASTVLTLMIIFWCIPVAVVGAININTLIEYAPWLE  
FINNLPKLLGLITGLLPVVALAVLMSLIPPFIKKMGKVSVCMTVQQVESYQAWFYAFNVVQVFL  
VMALCSSSMSAVPAIVGDPSSLMPLLAEKLPASSNFYIAYFCLQGLTITSGLLLQIVALILSKILGR  
KWNWNTLGQPFWSIYPNYQLLCVIAFSYAIAPLILGFVTFVFLYCVYMYTLVHVLQNKTDAR  
GRNYPALLQLFVGLYLAEICLTAMFVFGKNWAAVALEGIMIGVTALCHIYYKWKFLPLWDVVP  
VSAIRYTIEYNPDFIRNAYEDP

>Dictyostelium\_discoideum\_Q54RR3

YLSTGWPTFTTSFITNIVIGSVIMIIFFFLRIIYRN--FYNARLK-----  
TSPFQWIIYTISYQMESIFESRGIDAYMHLQFLYLCIQILSIIMVFGIGILLPINYTSITEE-  
LNTLDTVTVGTIQPNKRLWAHTLSIPIFTMVAFFQKTNTIYLEKRIRWMSKH----  
NERNYTVLVREMSRSISNADDMREFFSRKAILSCHIIYKEAKLRSLWRKHKHVQRSLERVLSES

DIKGV--PPTR----  
KTVDSVEYFTKKLEQVDKELRIAQEEAKSQDTSTAGFITFSRMAFASQAAQCLFSKNI-  
EKFKVTPAPEIKNIKWKNMIVPNRSRFLRRIVSSIIFFVIFCFYTIPVTAISAVSNIQTL-  
SKVPWLLEVVNLDLTLRGFVEGYLPSLALVFLALLPLFIKIIHFNKEDTRTQFYHKVFTVYWAFLV  
TNVFLVVSIAAGTVLGLFKMLENLTDIATLLGQSLPKQSSFFINYILVQALTSVPMDIVRPIELIAGII  
RSSMKASHDDPTSLNSIKYARELLIFVITLSYSTLSPLILPGLLYFLMDFFVSKYNYHSFCPKYQ  
SGGMIWPLVFNRLCIGLVIIYQLTGIGLFLVLTFFIPGIVISFLMPFFTLFYWWRNVDKYKKPSSVLS  
LDIC---EDYFGNEFVKSIEDP  
>Drosophila\_ananassae\_B3MGE2  
FFTSAYNGIPETLILNTIFWVLLIMLFTTLRHQAGDFG----  
RLLSNGQVSPRPSTDLSFGWIKIVLKLKTKETILLHTGPDVHLYSFQQHLMVMALVTLVSLAIL  
PVNFLNGPT--VNSFGRTTMANLANDSPWLWVHTIITILYVPLVVLIMRRASGRNAF-----  
KKAATRTIMISNISSDRNKTVVRNYMQEVTIENVTIAYNISRLHVRNGEFERVHEARLYCEHHR  
DKDTLMAKPEM---KKENAYEYYQREERKLSGDVARLRAS-  
MNEPLDIAFLTVSTVQEAQNIVTHFT---  
PGTQWHMMFAPSPDDIFWENLNVNKS HWY LKFFCVNVVLF LFLFLLTTPAMVVNLLNQR PWL-  
-----  
KNISPLISEFLPTLMLWTL SALMPVIVAVSDKWMGHYTRSKQNY SIMTKCFGYLLL MILILPSLGL  
TSAQALLEWGNE---  
TGRWQCIFLPERGSFYVNYIITAAFIGTALELLRFPELIVYIWQLLPYIKSILIEFPFGTHYAWTTLV  
FTISVVYSVFCPMIMPFAMIYICLKHFVDRYNYLFAYGPSNRKGGKIHSTAVTMTKFSVILVIVM  
TMFAYFRGESGMARFLLIITLAILTLFT-----FMSPKRC-----AGFGGY---  
>Drosophila\_erecta\_B3N988  
FFTTAYNGIPETLILNTIFWVLLILLFTTLRHQAGDFG----  
RLLSNGQVTPRPSAEGFLGWIRVTLKLRKETILLHTGPDVHLYSFQQHLMVMALVTIVSLVIL  
PVNFLNGPK--VNAFGRTTMANLSPEPWLWVHTIITILYIPLVVLIMRRASGRNAF-----  
KKAATRTIMISNISSDRNKTVVRNYMQEVTIENVSIAYNISRLYVRNAEFERVHEARLYCEQHR  
NRDTLMAKPD M---KKENAYEYYQREERKLSGDVARLRASA-  
MNEPLDVAFITVSTVQEAQNIVTHFT---  
PGTQWHLV FAPSPDDLFWENLNVNKS HWY LKFFCVNTVLF LVLFFLSTPAMVV SLLNSRPWV--  
-----  
KKISPLVADFLPTLMLWTL SALMPVIVAISDKWMRHYTRSKQNY SIMTKCFGYLLM MILILPSLGL  
TSAQALLEWGNQ---  
ADRWQCVFLPERGSFYVNYIITAAFIGTALELLRFPELIVYIWSLLPYIKAILIEFPFGTHYAWTTLV  
FTIAIVYSVACPLIMPFAMIYISLKHFDVDRHNYLFAYGPSNRKGGKIHSTAVTMTKFSVILVIVMA  
MICYFRGENGMARFLLIISLAILTLFT-----FMSPKRC-----AGFGGY---  
>Drosophila\_grimshawi\_B4J841  
LLISAYNGIPETLILNTILWVLLILLFTMLRHQASDY----RLLTNG--  
HPRSSVPSIFNWIRVTFKLRKETILLHSGPDVHLYSFQQHLMVMALVTIISVAIILPINFLHGSN-  
-GQSFGRRTMANLSGNSAWLWVHTIITILYIPLVVLIMRRSSGRNAF-----  
KKAATRTIMISNISNSDRNKTVIRNYMQEVTIETVSIAYNISRLYVRNGEFERAHEARVYCEHHRD  
RDTLMAKPEV---KKENAYEYYQREERKLSGDVARLRAS-  
MNEPLDIAFLTVSTVQEAQNIVTHFT---  
PGTQWQIMFAPSPDDIFWENLNVNKS HWY LKFFCVNVVLF IVLFFLTPAMVVNLLNSRPWL----  
-----  
KKISPLISEFLPTLMLWTL SALMPVIVSISDKWMGHYTRSKQNY SIMTKCFGYLLL MILILPSLGLT  
SAQALLEWGNE---  
TYRWQCIFLPDRGSFYVNYIITAAFIGTSLELLRFPELIVYIWALLPYIRSILIEFPFGIHYAWTTLV  
TISIVYSVFCPLIMPFAMIYICLKHMVDRYNYLFAYGPSNRKGGKIHSTAVTMTKFSVILVIVMA  
MICYFRGDEGMAKFLIITLAILVTLFI-----FMSPKRC-----TGFGGY---  
>Drosophila\_melanogaster\_Q6NP91

FFTTAYNGIPETLILNTIFWVLLILLFTVLRHQAGDFG----  
RLLSNGQVSPRPSTEGFLGWIRVTLKLRKETILLHTGPDVAVHYLSFQQHLMVAVMALVTIVSLVIL  
PVNFLNGPK--VNAFGRTTMANLSPDPSWLWVHTIITILYIPLVVLIMRRASGRNAF-----  
KKAATRTIMISNISSDRNKTVVRNYMQEVTIENVSIAYNISRLYVRNAEFERVHEARLYCEHHR  
NRDTLMVKPEM----KKENAYEYYQREERKLSGDVARLRAST-  
MNEPLDIAFITVSTVQEAQNIVTHFT---  
PGTQWHLVFAPSPDDLFWENLNVNKSHWYLKFFCVNAVLFVLFFLSTPAMVVSLNLRPWV--  
-----  
KKISPLVADFLPTLMLWTL SALMPVIVAISDKWMRHYTRSKQNY SIMTKCFGYLLMMIMILPSLG  
L TSAQALLEWGNQ---  
TDRWQCIFLPDRG SFYVNYIITAAFIGTALELLRFPELIVYIWSLLPYIKAILIEFPFGTHYAWTTLVF  
TIAIVYSVACPLIMPFAMIYICLKHFVDRHNL YFAYGPSNRKGGKIHSTAVTMTKFSVILV LVA  
MICFFRGDNGMARFLLLIISLAITLTLFT-----FMSPKRC-----AAFGGY---  
>Drosophila\_mojavensis\_B4KNX3  
LFISAYNGIPETLILNTIFWVLLILLFTMLRHQASDY-----  
RLLANGNPMPRPSTPGLFNWIRVTLKLRKETILLHSGPDVAVHYLSFQQHMMAVMAVVTVISLAI  
LPINFLNGPR--VNAFGRTTMANLQPEPWLWVHTIITILYIPLVVLIMRRSSGRNAF-----  
KKAATRTIMISNISNSDRNKTVIRNYMQEVTIESVSIAYNISRLFVRNAEFERVHEARVYCEHHRD  
RDTLMAKPEM----KKENAYEYYQREERKLSGDVARLRAST-  
LNEPLDIAFLT VSTVQEAQNIVNHFT---  
PGTQWHIVFAPSPDDIFWENLNVNKSHWYLKFVCVNVVLFIVLFFLTTPAMVVNLLNSRPWV---  
-----  
LKISPLVSEFLPTLMLWTL SALMPVIVSISDKWMGHYTRSKQNY SIMCKCFGYLLL MILILPSLGL  
TSAQALLEWGNQ---  
TGRWQCIFLPDRG SFYVNYIITAAFIGTSLELLRFPELIVYI WALLPYIKSILIEFPFGTHYAWTTLV  
FTISIVYSVFCPLIMPFAMIYICLKHMVDRYNLYFAYGPSNRKGGKIHSTAVTMTKFSVLILV LVA  
MICYFRGDDGMARFLIILITLAITVTLFI-----FMSPKRC-----VGFPGY---  
>Drosophila\_persimilis\_B4GGP0  
FFTSAYNGIPETLILNTIFWILLILLFTTLRHQATDFG----  
RLLSNGQATPRPSVQGLFGWIWITFKLRKETILLHTGPDVAVHYLSFQQHLMVMAIVTLISLAILP  
VNFLNGPK--VNAFGRTTMANLSPESPWLWVHTIITILYIPLVVLIMRRASGRNAF-----  
KKAATRTIMISNISSDRNKTVVRNYMQEVTIESVSIAYNISRLYVRNAEYERIH DARVYCEHHRN  
RDTLMAK PDM----KKENAYEYYQREERKLAGDVARLRAST-  
MNEPLDIAFLT VSTVQEAQNIVTHFT---  
PGTQWEMMFAPSPDDLFWENLNVNKSHWYLKFFFVNFVLFVLFLLFTTPVMVVNLLNSRPWL-  
-----  
KKISPLVSEFLPTLMLWTL SALMPVIVAISDKWMGHYTRSKQNY SIMTKCFSYLLL MILILPSLGL  
SAQALLEWGNQ---  
TGRWQCIFLPDRG SFYVNYIITAAFIGTALELLRFPELIVYIWSLLPHIKSILIEFPFGTHYAWTTLV  
FTIAIVYSVFCPLVMPFAMVYICLKHFVDRHNL YFAYGPSNRKGGKIHSTAVTMTKFSVILV FV  
MAMICAFRGDDGMARFLLLIISLAITLTLFM-----FMSPKRC-----AGFGGY---  
>Drosophila\_pseudoobscura\_Q28ZW6  
FFTSAYNGIPETLILNTIFWILLILLFTTLRHQATDFG----  
RLLSNGQATPRPSVQGLFGWIWITFKLRKETILLHTGPDVAVHYLSFQQHLMVMAIVTLISLAILP  
VNFLNGPK--VNAFGRTTMANLTPESPWLWVHTIITILYIPLVVLIMRRASGRNAF-----  
KKAATRTIMISNISSDRNKTVVRNYMQEVTIESVSIAYNISRLYVRNAEYERIH DARVYCEHHRN  
RDTLMAK PDM----KKENAYEYYQREERKLAGDVARLRAST-  
MNEPLDIAFLT VSTVQEAQNIVTHFT---  
PGTQWEMMFAPSPDDLFWENLNVNKSHWYLKFFFVNFVLFVLFLLFTTPVMVVNLLNSRPWL-  
-----  
KKISPLVSEFLPTLMLWTL SALMPVIVAISDKWMGHYTRSKQNY SIMTKCFSYLLL MILILPSLGL

SAQALLEWGNQ---  
TGRWQCIFLPDRGSFYVNYIITAAFIGTALELLRFPELIVYIWSLLPHIKSILIEFPFGTHYAWTTLV  
FTIAIVYSVFCPLVMPFAMVYICLKHFVDRHNLVYFAYGPSNRKGGKIHSTAVTMTKFSVILVVFV  
MAMICAFRGDDGMARFLLLIISLAITLTLFM-----FMSPKRC-----AGFGGY---  
>Drosophila\_sechellia\_B4HRJ2  
FFTNAYNGIPETLILNTILWVLLILLFTVLRHQAGDFG----  
RLLSNGQVSPRPSTEGIFGWIRVTLKLRKETILLHTGPDVAVHYLSFQQHLMVAVMALVTIVSLVIL  
PVNFLNGPK--VNAFGRTTMANLSPDSPWLWVHTIITILYIPLVVLIMRRASGRNAF-----  
KKAATRTIMISNISSDRNKTVVRNYMQEVTIENVSIAYNISRLYVRNAEFERVHEARLYCEQHR  
NRDTLMAKPDN---KKENAYEYYQREERKLSGDVARLRAST-  
MNEPLDIAFITVSTVQEAQNIVTHFT---  
PGTQWHLVAFSPDDLFWENLNVNKSHWYLKFFCVNAVLFVLVFFLSTPAMVVSLNLRPWV--  
-----  
KKISPLVADFLPTLMLWTL SALMPVIVAISDKWMRHYTRSKQNY SIMTKCFGYLLMMIMILPSLG  
LTS AQALLEWGNQ---  
TDRWQCIFLPERGSFYVNYIITAAFIGTALELLRFPELIVYIWSLLPYIKAILIEFPFGTHYAWTTLVF  
TIAIVYSVACPLIMPFAMIYICLKHFVDRHNLVYFAYGPSNRKGGKIHSTAVTMTKFSVILVLMVA  
MICFFRGDNGMARFLLLIITLAIMTLFT-----FMSPKRC-----AGFGGY---  
>Drosophila\_simulans\_B4QFA5  
FFTNAYNGIPETLILNTILWVLLILLFTVLRHQAGDFG----  
RLLSNGQVSPRPSTEGMFGWIRVTLKLRKETILLHTGPDVAVHYLSFQQHLMVAVMALVTIVSLVIL  
PVNFLNGPK--VNAFGRTTMANLSPDSPWLWVHTIITILYIPLVVLIMRRASGRNAF-----  
KKAATRTIMISNISSDRNKTVVRNYMQEVTIENVSIAYNISRLYVRNAEFERVHEARLYCEQHR  
NRDTLMAKPDN---KKENAYEYYQREERKLSGDVARLRAST-  
MNEPLDIAFITVSTVQEAQNIVTHFT---  
PGTQWHLVAFSPDDIFWENLNVNKSHWYLKFFCVNAVLFVLVFFLSTPAMVVNLLNLRPWV--  
-----  
KKISPLVADFLPTLMLWTL SALMPVIVAISDKWMRHYTRSKQNY SIMTKCFGYLLMMIMILPSLG  
LTS AQALLEWGNQ---  
TDRWQCIFLPERGSFYVNYIITAAFIGTALELLRFPELIVYIWSLLPYIKAILIEFPFGTHYAWTTLVF  
TIAIVYSVACPLIMPFAMIYICLKHFVDRHNLVYFAYGPSNRKGGKIHSTAVTMTKFSVILVLMVA  
MICFFRGDNGMARFLLLIITLAIMTLFT-----FMSPKRC-----AGFGGY---  
>Drosophila\_virilis\_B4LJM0  
IFTSAYNGIPETLILNTIFWVLLILLFTTLRHQASDY-----  
RLLANGTPTPRPSVPGIFSWIKVIFKLRKQTILLHSGPDVAVHYLSFQQHLMIVMAVVTIISLGIILPI  
NFLNGPT--VNAFGRTTMANLSPNSSWLWVHTIITILYIPLVVLVLMRRSSGRNAF-----  
KKAATRTIMISNISIDRNKTVIRNYMQEVTIESVSIAYNISRLFVRNAEYERAH DARVYCEHHRD  
RDTLMAKPEM---KKENAFEYYQREERKLSGDVARLRAST-  
MNEPLDIAFLTVSTVQEAQNIVTHFT---  
PGTQWHVMFAPSPDDIFWENLNVNKSHWYLKFFCVNVVLFIVLFFLTPAMVVNLLNLRPWL---  
-----  
KKISPLVSEFLPTLMLWTL SALMPVIVSISDKWMGHYTRSKKNYSIMTKCFGYLLLIMILIPSLGLT  
SAQALLEWGNQ---  
IGRWECIFLPDRGSFYVNYIITAAFIGTSLELLRFPELIVYI WALLPYIKSILIEFPFGTHYAWTTLVF  
TISIVYSVFCPLIMPFAMIYISLKH MVDRYNLVYFAYGPSNRKGGKIHSTAVTMTKFSVILVLMVA  
MICYFRGDDGMARFLIITLAIMTLFI-----FMSPKRC-----TGYAGY---  
>Drosophila\_willistoni\_B4NMJ5  
FFTSAYNGIPETLILNTIFWILLILLFTMLRHQAGDFG----  
RLLNNGHPTPRPSAQGIFGWIKITFKLRKETILLHTGPDVAVHYLSFQQHLMGVMALVTLVSLTIIL  
PVNFLNGPK--VNAFGRTTMANLSPESPWLWVHTIVTILYIPLVVLIMRRASGRNAF-----  
KKAATRTIMISNIASSDRNKTVVRNYMQEITIESVSIAYNISRLYVKNAEYERVHEARLYCEHHRD

RDTLVAKTEM---KKENAFEYYQREERKLSGDVARLRAS-  
MNEPLDIAFLTVSTVQEAQNIVTHFS---  
PGTQWHMMFAPSPDDIFWENLNVNKSHWYLKFCVNVVLFIVLFFLTPAMVVNLLNSRPWL---  
-----  
KKISPLVSEFLPTLMLWTL SALMPVIVAISDKWMGHYTRSKQNY SIMTKCFSYLLLMILVLP SLGL  
TSAQALLEWSNE---  
TGRWQCIFLPERGSFYVNYIITAAFIGTSLELLRFPELIVYIWSLLPFIKSILIEFPFGIHYAWTTLVF  
TIAIVYSIFCPLIMPFAMVYICLKHFVDRHNLYFAYGPSNRKGGKIHSTAVTMTKFSVILVLMMA  
MICYFRGEGGMARFILLITLAILTLFT-----FMSPKRC-----AGFNGY---  
>Encephalitozoon\_cuniculi\_NP\_585973.1  
PLSRADNAVLTNAV FQGFITFCILIA YVIL--RKRKWL YSPN-----  
VRGRPSHPTGFLSWIIPVVTVNDTILLSIIGLD AFMMLQTLKMLYRILFILSLFVIPSLGYLFWTNQ  
RENV DQWLVRLSLGLSDPD SGSYRLVIPVY LISGFIMYSIFIYKRYIVLRQAYLRNP-  
EYVNLPNRTLLVSR LPSYVNN DVLDYEFINAGEIDDSVLVYDTNTLQSLYGERDSYIY NIEKEINE  
KFVRINQKRQLIK-  
EGEDVSRVSLYLEKLNDVNARISREKEIIEFSFKTKRGFVTFKDQRSANIVKQSQIGSRI-  
FSVTTEDAPAPNDVIWENITN SEVENYMY SIFGTVFFILFIVL FSSMVSIVTLLVNFEGFKESKFLF-  
--SRY-  
TIADSLRGALSPLIYNSMLLLVPTVIT ALMNMEGIYSYSTLQQK LMDKLCNFFNGFASVFFVTS  
FYRLFSDVLSRKEDIVEAFSKE SLESSVFFANIIIQKSLVGTALTLLKPAPLLINYIIFPKLDAEFSP  
FDGTIFPSCLTVFMSIAYAVMCP PILLGAFYFCNYLAFKSEFLYSSRNEYESGGGYWDSA  
CQNIVFSLIFFQVVF AKMSSDKRFYLSMSLFP IILITFIFRNSLRKMFYK SCHFYPLNIKEEERNV  
LLESWSEIGKGP  
>Gallus\_gallus\_E1C718  
LQGLPFGGVPTVLALDFMCF LALLFVFSILRKVAWDYG----RLLDADTS-  
VSSSVNGFCSWLTAIFRIK DDEIRDKCGGDAVHYLSFQRHII GLLVAVGVLSVGIVLPVNFSGDLL  
--AYSFGRTTIANLNSGNLLWLHTSFAFLYLLLVYSMRRH TSKMRY-----  
KEDDLVKRTL FINGISKYAEP-  
EKIKKHFEECTVLEARPCYDVARLMFLDAERRKAERGRIYFTNLQSKENTNPKPCG-H--  
EEVEAIEYYTKLEEK LKDDYKREKEKV-  
NEKPLGMAFVTFHNETITAIILKDFNASSSLHNWTVSYAPDPQNIYWEHLSIRGFIWWIRCLVINV  
VLFILLFFLTPAIITMDKFNVT-----  
KLNNPIITQFFPTLLLWCFSALLPTIVYYSAFFEAHWTRSGENRTTMHKCYTFLIFMVLLLPSLGL  
SSLDVFFRWLEA---  
AVRFECVFLPDNGAFFVNYVIASAFIGNAMDLLRIPGLLMY MIRLCRNVRHQAYEFQFGAAYAW  
MMCFTVVM TY SITCPIIVPFGLMYMLLKHLVDRYNLYYAYLPA-  
KLDK KIHSGAVNQVVAAPILCLFWLLFFSTMRTGFLAP TSMFTFVVLVITIVICLCHVCFGHFKYL  
SANYK-----ATESEE---  
>Homo\_sapiens\_B2RN22  
LQGQPFGGVPTVLCLNIALWVLV LVVYSFLRKA AWDYG----  
RLLHNDTSPSETSLKGFCSWFFNSITMKDEDLINKCGDDARIYIVFQYHLIIFVLIICIPSLGIILPINY  
TGSVL--SSH FARTTIVNVSTESKLLWLHSLLSFFYFITNFMFMAHHCLGFAP-----  
RNSQKVTRTLMITYVPKDIEDPELIIKH FHESVTRVHFCYDVRNLIDLDDQRRHAMRGRLFYTA  
KAKKTGKRIHPCA-R--KEVD AEQYYSELEEQLTDEFNAELNRV-  
PLKRLDLIFVTFQDSRMAKRVRKDYKYSSIVKYWRVTMAPHPKDIIWKHLSVRRFFFWARFAI  
NTFLFFLFFLTPAIIMNTIDMYNVT-----  
RLQNPIVTQFFPSVMLWGFTVILPLIVYFSAFLEAHWTRSSQNLVMVHKCYIFLVFMVVILPSMG  
LTSLDVFLRWLQA---  
SIRFQCVFLPDNGAFFVNYVITAALLGTGMELLRLGSLFCYSTRL FVNIKNQAIDFQFGREYAWM  
MNVFSVVMAYSITCPIIVPFGLLYLCMKHLTDRYNMYYSFAPT-

KLNEQIHMAAVSQAIFAPLLGLFWMLFFSILRLGSLHAITIFSLSTLLIAMVIAFVGFGLGKLRMVAD  
EPE-----SPARHTY---  
>Homo\_sapiens\_O94886  
LQGVTFGGIPTVLLIDVSCFLFLILVFSIIRRRFWDYG----  
RILEADSSTSSSGQLGCCPWLTAFRLHDDQILEWCGEDAIHYLSFQRHIIIFLLVVVSFLSLCVILP  
VNLSGDLL--PYSFGRTTIANLQTDNDLLWLHTIFAVIYFLFTVGFMRHHTQSIKY-----  
KEENLVRRTLFTITGLPRDARK-  
ETVESHFRDCEVVDVQLCYNVAKLIYLCKEKKKTEKSLTYTTLQVKTGQNPCKPCG-Q--  
EWEDAISYYTRMKDRLLERITEEERHV-  
QDQPLGMAFVTFQEKSMATYILKDFNASSELYKWTVTFAADPEDICWKNLSIQGLRWWLQWL  
GINFTLFLGLFFLTTPSIILSTMDKFNV-----  
KLNNPIISQFFPTLLLWSFSALLPSIVYYSTLLESHWTKSGENQIMMTKVYIFLIFMVLILPSLGLTS  
LDFFRWLEA---  
SIRLECVFLPDQGAFFVNYVIASAFIGNGMELLRLPGLILYTFRMIRNVQNQAFQYEFGAMYAW  
MLCVFTVIVAYSITCPIIAPFGLIYILLKHMVDRHNLVYFVYLP-  
KLEKGIHFAAVNQALAAPILCLFWLYFFSFLRLGMKAPATLFTFLVLLLTILVCLAHTCFGCFKHL  
PNYK-----QQQQQTY---  
>Homo\_sapiens\_Q5T3F8  
LQGLPFGGVPTVLALDFMCFLLALLFLFSILRKYVAWDYG----RLLDADTS-  
VSSSVNGFCSWLTAIFRIKDDDEIRDKCGDAVHYLSFQRHIIIGLLVVVGVLSVGIVLPVNFSGDLL  
--AYSFGRTTIANLKSNNLLWLHTSFAFLYLLLVYSMRRHTSKMRY-----  
KEDDLVKRTLFIGISKYAES-  
EKIKKHFEECTVLEARPCYNVARLMFLDAERKKAERGKLYFTNLQSKENVNPKPCG-H--  
EQVEAIEYYTKLEQKLEKEDYKREKEKV-  
NEKPLGMAFVTFHNETITAILKDFNVSSSLHNWTVSYAPDPQNIYWEHLSIRGFIWWLRCLVIN  
VVLFFLFFLTTPAIIITMDKFNV-----  
KLNNPIITQFFPTLLLWCFSALLPTIVYYSAFFEAHWTRSGENRTTMHKCYTFLIFMVLILPSLGL  
SSLDLFFRWLEA---  
AIRFECVFLPDNGAFFVNYVIASAFIGNAMDLLRIPGLLMYIRLCRNVRHQAYEFQFGAAYAW  
MMCFTVVMYTSITCPIIIVPGLMYMLLKHLDVDRYNLYYAYLPA-  
KLDKIHSGAVNQVVAAPILCLFWLLFFSTMRTGFLAPTSMTFFVVLVITIVICLCHVCFGHFKYL  
SANYK---S---SGDEPPS---  
>Laccaria\_bicolor\_B0D8L9  
SRTLAPAAVGSQVALMSIISVIAILLFNFL--RPTNKIIEPKVY---  
EGNKPPPKDSIFGWLPPLIHTKEPELLDKIGLDAVAFLRFLRLRLFTGITLLTCGILIPINVVYNL  
KN-RDILSMLTIRDVKG-S-  
FLYAHVVVTYLITLLIVFCVNMHWKAMVGLRHTWFRSPEYMQSFYARTLQVIHVPKHKHSDEGL  
KGIFAGYPTTSVHIGRKGKLPVIEYHNQTVREFEELVKYLKG-  
GANRPTIRLGGTRKDAIEFYTAKLKRTEAAIEDYRSQI-  
DTRAENYGFASLAAPYAHIVAKKLDGKHP-  
KGTTVDLAPNPKDIIWENMKNKSDAELARKRLVGFVWLVLCFFNTVPLFIISILSNLDSIR-  
VYVPFQTFWEDSFSFAFVSGVLPAPISGLFGFFLPIIMRWLTKYMGALHSHKLDRAVVARYYSFL  
IISQLVIFTLIGVIFNSVKEIIQQIGSLPKQINRTYINQASYWLTFFPLRGF-  
LVVFDLAQIINLWLSIKTHIREWTQPPLFQYAIYYSNIFMAAVGMVFAPLAPLVVLAATIVFWM  
SSWVYKYQLMFVFSKVESGGRLWNVVNRLLFCVLLMQALMILSRPLW---  
IQWLSVPPILIIIAFKIYINRTYLPAYFFNPSDEE--DT-QGNRLEKRFQHP  
>Laccaria\_bicolor\_B0DWN0  
MQKFEGPWFTTQLTISLSVGLTSFFLFSYCRTRWP---IFAPRTLFSF-----  
QAFFGWIMPTIRTSEFTVLQIVGLDAVLLNFFKMSFYLSVCSLFATTMLMPLNWKHNKDLHDH  
TGHDWLDLI--SDANSYLSLHLMFTYLFLLALYFIYKNYRRFLRSRQLFLELV---  
HSIPARTVIVTDLPNHLQGERPLADYFENLAVESVTVCREVGS�KTLLDRRTRALLELETAWVSY

VGNPSRKRPRTL--FKPKVDALEYLENQFKEADELVKKRRRTG-  
KFKATRAAFVTFEKMSSAQIAVQVAHAPGP-  
GQITTYPAPEPRDIVWSNMAPSQATIRTRDFFVLAIMGFLLFFWIFPITALASLLSYKEIKKSMPW  
LGNLIDSNQVRAIVQNSLPSVAMISLNALLPFILEALTYVQGYRARSWVEYSLLKKYFLFLLVNVV  
FIFLLASTYWQLVRDLANSPAKVPEKLAQALQRARHFFLSYVILQGLGIMPLQLLNLGIVVPRFFY  
RMFAELNAPPMINYGVVYPQAILMFVITMLYSVVQPLIVIFGAIYFGVAYVVYKYKLLFVYKPYE  
SQGQAWPITFIRLIWGVVIFLLFMIGIFTLRKSILSSLLVPLLIGTVVWSWYVDKELKPLSKFVSL  
SSVFEV-----NTGKRRYGHP  
>Lotus\_japonicus\_B0BLA8  
---ASLGDIGLAAAINILTAF AFLIAFAVLRIQPINDRVYFPKWYLKG--  
LRSSPLIRFLNWMPAALQMPEPELIDHAGLDSAVYLRIYLLGLKIFVPISLLAFSVMVPVNWNTNT  
LE-YSNIDKLSISNIPTGSNRFWTHLAMAYLFTFWTCYILKREYQIVATMRLSFLASER--  
RRPDQFTVLVRNPPE-  
SVSELVEHFFLVEHYLTHQVVYDAKKLSSLVAKKKKKQNWLDYYELKHSRNQSI-  
RPTKKTGSSVDAIDFYTAIEIKLSEEIELERDKVKPKSIMPAAFVSFRTRWGAAVCAQTQQTR  
NP-  
TIWLTEGAPEPRDVYWDNMAIPYVSLRIRLLIIGVAFFFLTFFFMIPIAFVQSLANIEGIEKAAPFLK  
SFIEIKFIKFSIQGFLPGIALKIFLIFLPTILMIMSKFEGFISLSGLERRSATRYIYFQFINVFLGSIITGT  
AFQQLDKFIQSANEIPKTIGVSIPMKATFFITYIMVDGWAGCAGEILRLKPLIFYHLKNFREEAMD  
PGTIGFNTGEPQIQLYFLLGLVYAVITPFLLPYIIVFFGLAYVVYRHHQIINVYNQEYESAAAFWPD  
HGRIIFALVISQLLLMGLLSTKEANSTPLLILPVLTIWFHLFCKGRYEPAFVQHPLQEAMMKQLN  
YKEFLQNAIYHP  
>Medicago\_truncatula\_A2Q3S2  
----IFSALLTSIAINFGFCSLFFTLYSILRKQPGNILVYAPRLVSE-G-KLQ---  
LPTSGWVRRRAWEPSDDEFISTAGLDAFVIRIFVFLSKVFAFAGIVGTIFLLPVNYMGTQI--  
KTSLDSFSISNVNNGSHRLWIHFSAVYIFTGVVCILLYEYIYIASKRIACFYSSK--  
PEPRQFSILVRGIPVC-  
TCSEAVEQFFMESAYHSHSVVRRSSKLQILVTDTRLYKRLTQLKDKENSP----  
QRHRRDFGQKVDLLDHYEKKLGDADNVRIEQSALAGK-  
EVPAAFVFSKSRFGAAIALNSQPGVNP-  
THWITEPAPEPHDVYWPFFSVTFIRRWISRLAVFVACIALTILFLIPVAVVQGLTHLDQLETMFP  
LRSILRLTLVSQVITGYLPIQILQLFLSFVPAIMIFLSSLQGYISWSQIQKSACTKVLWFTIWNIFAN  
VLSGSALYRLNYFL-  
EPKEFPRVLAEAVPAQASFFMAYIVAFGWTNIASELFQLIPLSYNYVNRYDFEAP---  
SIPYYSEIPRILFFGLLGVTYFILAPLILPFILVYFCLGYIIRNQLLYVYVQKFETGGFEWPIVHNC  
IFSMVLMHIIIGIFGLKELPIASGFTLPLPIVTLFNEYCQKRFIPIFNAYPAECLIKKMEFYDKLT  
NAYNDP  
>Micromonas\_pusilla\_XP\_003057675.1  
LTD--AGLSFKELGWLTLFVVLFALFNALRKIRYLRFSFDPC-----  
YARPDFKGTFGWLRRAWVVKDTELYNFITDELMLLRWFRLAYTWFVGLVLFAMWPLMIAYK  
FEGDYQVELGIKRLSLTMAYRGN-ILLIVVVEIWLASLWLVYLLGKETRAYARLVWKS-----  
KTTGIKAHAVLVSDIPVEVEAEE--AKKFSEDAVVSITIARDTRKLDKAAEAYNNLNIRH-  
NLKLHLSEL--DQKLMK----  
ESQKAHNDLVIKIEKSDVQREKTRNKRYDESPSPAIVVFSRQMDSVIASSMALDDWY-  
GRWKTSAAPGPNDLVWHNVSLTSKQRFWKNMRAHAIAAVVILFFMIPINYITYLISLGYD-DIVA--  
-----  
AIGTSGHSILIALVLTIFLVVGHIVSLVLSKQYGYTSKAKMDSRGADIYFWLLFCNLFLTNSGSSV  
YEDLRVWLNRPATMVNALMVQIVSQQTFFLLFCMLRIAQSCPLELLHPPFHLGFIVKSFMIQWT  
QPENTPMHRVPAQTMFVFFLGTMYCMVQPLVIPVCAVFFSLFYLFFKHNLRYHYMQSYNFGQT  
TWPWLQYTFNSLMLAQIIAIGISLIDGERLRYLLLPLPVVTWAYHRRTKVIMRASR-  
KVPVTRSG--EKVMKLIRKGIWYLP



>Micromonas\_pusilla\_XP\_003059254.1

-----SAVVGLVCMFVFALVRERHK---AYRTRVHVT----  
RNPPPTFLWGWIVHVVRVKEQALYDTAGLDVLYFDRSNRLCFLISLFVAVVNLVLPVNYKLG  
TVITMMTIDKISMTNIPVGSPLLWVHTLVVVVTVYFVSFLLYLNFVDYRADRQAWLGHSEFAVKA  
QQYAVLVTNVPSFTATQAAVSRTFARDDFVATVPVRYHAKIDVLLTMLDQTQLSMLPT-  
SKLAACL-----ASRREKISTQVEEIFAHIQLEQKA--NPRSALSHIVIFKSQVSAAVAAQTLL--  
PGGPWNVSSAPAPDDVNSNTLWLYPGQKWFRSTVAAILIAGLV---  
VFPIGIFTSMVSLSQSLGSSWWY---  
CKDGGFFVRLLTAWVPSLLLALWAVVIPYGFALQGAEVSLSGIDRKVFTWFYLYNALNVLGG  
MLAGTLFSQLENIKTPGSSFFNLIGHALPQSAGFFISYVSTYAFMLEPLRLLLPHLGLVLTSLFTSID  
AAFEKTLRLGAQYGGQQLILLCLVFSTASPLITAAALVYFTLSLLVKRYHIMYIFVRSYESGATL  
FPSLFSRILVSLLYQIFMSAYLLIKEAYTQAFVLLIPPFLWQFHSHYCLTRFITKSTYLPLIAD---  
KMPVASIPLDTYDAP

>Micromonas\_SP\_XP\_002501858.1

GTNFTATEFFITCGWLAVLWVVLMAVFIFIRSFKHMMHTCDPC-----  
YKRPPKKGHFAWLVRWHVTDTELIANTTPDELMLLRWYRMVYHWFFGATIFVLPVCATLYHL  
DSKDQ-AFGMKRITIAAANSEG-VFWVVVLQMWVISTWLVLVLLSRETAAYTRLVWRL-----  
SRIGIKSHAVLVSIPMKAEAEQEMAKAWSEGCVSVLLARDTRKLDKSNANAWKASEQAY-  
ELKDDIEEALGENKGSK----DV-----  
ELKAKLAKADEEREKLRDRYDETPSPSSIVVFSRQMDAVIASQVQLDNQF-  
GRWHTPEPAGPNDLVWHNVALTGKQRWRKNIRARLVATIMVIFFSVPVNLVAALNAGKD-  
DIVS-----  
VLGEGIFKVLIGLITIFLVVAHIMSLVISRQYGSIAKSTMDVRGASIFWLLVLNLFLGNLNSTPV  
WEDLLDWIQDPKLVSTLIYRCVEASSFFLQFCLLRIATSTVLELIHPPTHGLYLKTLMVQWSQ  
PENTPLHRVPAQTMLIFFLGCQYCVTAPAFLPVCGVFFSLFYLFWKHNLSYHYMQPYLSGLTL  
WPWLVKQTFNSLLFSQVVLILGLPLSKTEYLRLALLPLPVWSWMQIRRCMAVLRRAS-  
KVPVQR----DKVREMOVAKGTWYQP

>Micromonas\_SP\_XP\_002502566.1

NTKRSWKDTRNAMIMSASIGIACLILFGLVRHHCK---VYRTRLHVAP---  
HRPPPWNLFGWVLDVNNINQRTLYDTAGLDALYFDRSNLLMLKVIGFVAVVNCGVVMPVNYLL  
GDVITMSPDKLSMTNIPISALMWIHAAVVLTTFVCALLYVDANDFRADRHAWLGHWSQWA  
VKAQQYAVIVTNV-----  
TKSTVSTFRSPDVIAAVPVLHHAIVDKNLEKLDQAQLSLLNPESERMKKM-----  
LSRREFLKDKITSTFSVAKKQED--DPRSGYSYIILFRSQASAAIAAQTLLD--  
PGGGWNVAAPAPDDVNFQSLWLGPGRWYRSIVALLTVAFIV---  
SFPIGIFTSMVALSAALSDILWY---  
CDNKFFFRLLTAWIPSLLLATWAVVVPFGFAFVALEGSEITLSGIDRKVFRWFYLYSCLNVLAGG  
MLAGSFFSQLENIIRTPSSIFTLLGYAVPQSSGFFLAYISTNAFMLEPLRLLLPHGGVLLWFATGI  
SAYFSPRSQRYGSNYGTQQLIFLICLVFSTASPVITPLGFAYFLLAWLVWRYQLCYVFIRAYESG  
ALLFPALFSRIMISLLLYQMFMSFYLLIKAAPVAFVLIIVPPFLWSFHSHCTRCFMMKSVYLPLAI  
A---EMPVASIPVDTYCAP

>Monosiga\_brevicollis\_A9UQI6

RAYSTTASFVVAFAFNGLVGLLCIIIFVFRPR--FPQLEYEPTD-----  
HGWVGLWRSILSIGDDEIFRKCGLDSTMYLVMFRYATFLFFCMAFYVLIVLMPINSRGKFLSGE  
HGIDRVSLANVPEGS DYLWAHLVAAYLVALLAMYLLDHAYRKVFRFRREYLQNR----  
RADSYYVMVRDIPSSCRDDRGLAHYYREPDLAATRARNIDALHPVSEQRKTAIKLERYTFRD  
QRDGG-----SGDQRPAYEYLGRTLEQQNADFASARRSAV---  
YHATGFVAFASQRSATVAAQVLHCAEP-  
YTWSTQRAPEPQDLVWENIGVTSQERAHRTAIASLITGALVVLWVIPVTFVASITTLETLDLWAD  
GLDDVADASLVQGMVQGVIPITLLLVIFMAVLPGIMKFISRKEGIASKSEIGRSAMAKLFWFQILNV  
FLVSFIAGSILDIADNFSRDPRGVLKLLGGAIPTGTFFTTYVMLRSVTGYPTMLLRVWEVLWSLI

VGLEKARREETWNVAPAAAGDILVFLVGVVYVVVTPHAPFLVLYFGLGYLTIRHLLYYVYRPTP  
DSGGLLWPMFLNRLMVALLIAELVAGVFSVKNPPVAAMMLPLAAFTLWFWFRTHKGLEAVG  
DYLPMEEVAAEE-APLDEADLQDYVQP  
>Mus\_musculus\_Q3TWI9  
LQGLPFGGVPTVLALDFMCFLLALLFLFSILRKAWDYG----RLLDADTS-  
VSSSVNGFCSWLTAIFRIKDDDEIRDKCGDAVHYLSFQRHIIIGLLVVGVLSVGIVLPVNFSGDLL  
--AYSFGRTTIANLKSGNNLLWLHTSFAFLYLLLTVYSMRRHTSKMRY-----  
KEDDLVKRTLFIGISKYAES-  
EKIKKHFEECTVLEARPCYNVARLMFLDAERKKAERGKLYFTNLQSKENVNPKPCG-H--  
EQVEAIEYYTKLEQRLKEDYRREKEKV-  
NEKPLGMAFVTFHNETITAIILKDFNVSSALHNWTVTYAPDPQNIYWEHLSIRGFIWWLRCLVINV  
VLFILLFFLTTPAIIITMDKFNVT-----  
KLNNPIITQFFPTLLLWCFSALLPTIVYYSAFFEAHWTRSGENRTTMHKCYTFLIFMVLLLPSLGL  
SSLDLFFRWLEA---  
AIRFECVFLPDNGAFFVNYVIASAFIGNAMDLLRIPGLLMYMLRCRNVRHQAYEFQFGAAYAW  
MMCVFTVVMYTSITCPIIVPFGLMYMLLKHLVDRYNLYYAYLPA-  
KLDKKIHSGAVNQVVAAPILCLFWLLFFSTMRTGFLAPTSMTFFVVLVITIVICLCHVCFGHFKYL  
SANYK---S---SGDEPPS---  
>Mus\_musculus\_Q8CBX0  
LQGQPFGGIPTVLVNLILWVVFVLLYSFLRKAARDYG----  
RLLHNDSSPSEVSLRGFSSWFFNSLTMRDRDLINKCGDDARIYITFQYHLIIFVLILCIPSLGILPV  
NYIGTVL--NSHFGRTTIVNVSTESKFLWLHSLFAFLYFLINLAFMGHHCLGFVP-----  
KKSLHFTRTLMITYVPTEIQDPEIISKHFHECVTRVHFCYDVRNLIDLDDQRRHAMRGRLYYTA  
KAKKTGKKTHTPCS-R--KEVD AEQYSELEEQLTDEFNAELNRV-  
QLKRLDLIFVTFQDARTVRRYDDYKYSSIVKHWRVAHAPHPKDIWKHLSIRRFSSWWTRFIAINT  
FLFFLFFLTTPAIIINTIDIYNT-----  
RLQSPIVTQFFPSVLLWAFTVTMPLLVYLSAFLEAHWTRSSQNLIIVHKCYIFLVMVILPSMGL  
TSLHVFLRWLHA---  
TIRFQCVFLPDNGAFFINYVITAALLGTGMELMRLGSLCTYCTRLFVHIKNQATDFQFGREYAW  
MLNVFSVVMAYSITCPIIVPFGLLYLCMKHITDRYNMYYSYAPT-  
KLNAQIHMAAVYQAIFAPLLGLFWMLFFSILRVGSLHSITLFSMSSLIISVVIASFVFLGKLRIAQR  
EQP-----SPARHTY---  
>Mus\_musculus\_Q91YT8  
LQGVTFGGIPTVLLLDVSCFLFLILVFSIIRRRFWDYG----RILEAGSS-  
SSSGQLGCCPWLTAFRLHDDQILEWCGEDAIHYLSFQRHIIIFLLVVISFLSLCVILPVNLSGDLL--  
PYSFGRTTIANLQTDNDLLWLHTVFSVIYLFLLTVGFMWHHTRSIRY-----  
KEESLVRQTLFITGLPREARK-  
ETVESHFRDCEVVDVQLCYSVAKLIYLCKERKKTEKSLTYTNLQAKTGRNPKPCG-Q--  
EREDAISYYTRMNSDLSLLERITAEESRV-  
QDQPLGMAFVTFREKSMATYILKDFNASSELCKWTVTFASYPEDICWKNLSIQGVRWWLQWL  
GINFSLFVLLFFLTTPSIIMSTMDKFNVT-----  
KLNNPVISQFFPTLLLWSFSALLPSIVYYSTLLESHWTRSGENRIMVSKVYIFLIFMVLILPSLGLT  
SLDFFFRWLET---  
SIRLECVFLPDQGAFFVNYVIASAFIGSGMELLRLPGLILYTFRMIRNVQNQAFFEYEFGAMYAWM  
LCVFTVIMAYSITCPIIVPFGLIYILLKHMVDRHNLYFAYLPA-  
KLEKRIHFAAVNQALAAPILCLFWLFFFSLRLGLTAPATLFTFLVLLTILACLLYTCFGCFKHLS  
PNYK-----QQQTY---  
>Nematostella\_vectensis\_A7RGG4  
-----VLFCVIRRLVWDYG----  
RLVKEDPSVTFPEVKGLLSWVPVLLRVTDDEHIHVKCGMDALQYIQFQKHLIVYSVIIFCLSIGIVLP  
INYSGTNE--RNSFGATTVSNLEAQSSMFWLHAVFALLYIIIVILRHFTSLFNM-----

ESLHESATTVMITNIPKNVTKEL-  
 IQQHFVESMIEEVQLAYNCDKLQSIERKLEAARLGREHCQELLQLNGEKVSPCM----  
 KHV D G I E Y F T E V E G K A R V E F E Q T K Q S --- L K S L G V A F V T F V N E E T S Q K C L K D F N -  
 S S K I F H W N V A S A P L T G D I L W E H L S V D P E S W W A R A L I I N I L F I F V L F I T T P T V L I T S F N E I K A S I -----  
 ---  
 V A P N P F F T Q F L P T I M L W T F S A I L P V V V S Y S S Y F E A H W T R S R L E H S V M I K T Y V F L L L M V I V L P S L A L  
 T S A D A L F Q V T K S -----  
 R L A C V F L P N N G A F F V N Y L V T S A L I G T A L E L C R F P E L A A Y A V R M C R L V R E S V R E F A F G H Q Y A W M I  
 V I F S V M V V Y S I A C P L V T P F G L L Y L T F K H V V D R Y N L Y F N Y R P A Y Y V D P S V H S T A V V F T I I S S F F L L L S  
 I L F F G V V R L G I N D P Q T I F T I V L V A L T L A A F V G R V A F G F F K R L G P K Q R ----- L T R R K T Y T S P  
 >Neurospora\_crassa\_XP\_956097.1  
 K D P A S L S A L G S T F V P V L V Y A A I C L L I F F T F -- R R I S T R T Y A P R T I A Q L P -  
 E H P A Q T N G W I D W V K P F W K I D D D Y I L N N C S L D G Y L F L R F L K I L S V I C F A G L A I S W P I L L P I N A T G G N -  
 - L - R Q L D K L T M G N I ---  
 P S K Y Y A H V V V A W L F F G F V L F M V C R E C I Y Y I N L R Q A Y L L S P N M S N R L S A R T V L F T C I P K P Y L D E A K  
 L R K L F G -  
 D S V K N I W I P K N T N Y L R G L V E D R D D V A E R L E K A E I E L I K K A N N D R P H H R P F G R R V D T I R W T R A R L  
 K V L N R D I W K L R R K F R D G Q P L S S A F V E F D S Q A S A E A A Y Q I L S H H Q P -  
 M H M S P R I G V R P E Q V I W S S L R I R W W E Q I M R Q F L M L A L V V A I I F W S I P S A A V G I I S N I D F L S E K V P F  
 L F W I P L L P V I L G V I K G L L P A V A L S M L M A I V P A G L R V C A R V A G C P S H A L V E L Y C Q S A Y F A F Q V I Q V F  
 L V T T I T S A A S A A I I D V I K Q P M S A P N L L A Q N L P K A S N F Y L S Y I L V Q C L G A G A G K L A N V S D L L R H Y V A  
 T S A Y H W R K L T P I H W G A V Y P R F T N M G V I A L A Y S C I S P L I L V F A G F G M L F V G L V Y R Y N L I Y I H D S E L D  
 T K G L L Y P R A L L H L M V G L Y I A E I C L I G L F A L K K A F G P M L L M I L F F G F C A I T H Y S L S S A L S P L L A S L P Q T  
 L A L E K E L P K G Y E N K R G Y Y P P  
 >Neurospora\_crassa\_XP\_962104.2  
 A A Q L S S N S I Y A A L G S S V S I T V A V A L G F S L V -- R P L N T V V Y A P K L H ---  
 D D K H A P P Q K G F F S W I K P L W T T T E Q D L V R L V G M D A T I F M R F T R M C R N I F L C L A V L C C C I Q I P I N W  
 Y K N --- S P W L Q K V T P M N V W N - Q -  
 W Q W A T V V M S W V T T L I V C F F L W W N Y R K V C E L R I Q Y L R S E E Y Q Q S L H A R T L M L Y D I P K N L T S D E G  
 I A R I I D S S S F S R T A V A R D V K I L P T L I E E H E K T V R K L E Q V L A K Y L K D P K V T R P V C R P K D K L D A I D Y L  
 T Q R I K L L E L E I K E V R Q R I - D K R S M P Y G F A S Y S D I S E A H A I A Y L C R S K K P -  
 Q G A R V T L A P K P N D I V W E N M P L S S A S R A T R R L W N N L W I T V L T V V W V A P N A M I A I L V N L S N L A R V  
 W P D F Q K S L E T N N F W A I V Q G I A S P A L T S L V Y M V L P I I F R R L S M K A G D M T K T G R E R H V V A K L Y S F F  
 V F N N L F V F S L F S A L W S F G A T V I K N T A T F G T T V F V S L C G I S P F W V V W L I Q R Q L -  
 G A A I D L S Q L W K L I Y G S I M R K L I E L T A P P P F D Y A S Y Y N Y F L Y A T A A L C Y A P I M P L V L P A A G M Y F A I  
 D V A L K K Y L L M Y V F V T K T E S G G M F W R I L F N R I L F G L M L S H L I V F L V W V V R G -  
 K T Q A Y A V V P L P I L I I I F K F V C S W I Y D N K I T Y F S T R I I K -- G P - R N D R L A S R F G H P  
 >Neurospora\_crassa\_XP\_962529.1  
 F G G I S L V A F L T A L A T S L V V F G V Q M G L F L L L -- R H K L A R I F K P K T Y -- L E -  
 R E R T E P A S P W N L L S T V L R Y N D R E I I K K C G L D A Y F F L R Y L Q T L L V L F I P I A I V I P I L I N Y V G G L --  
 G P T G L D T L A W G N V -  
 E H Y R R R W A H L I L A L L V I I W V C G V F F A E L R V Y V K I R Q D Y L T S A E H R L R A S A N T V L V S S I P D K W L T E  
 D A L R G L F D V G G I R N V W L T R D F T K L L E K I H R R D A I H V Q L E E A E T E L I R E A K K D R P H H R L L N K K V D T  
 I Y W C R A E L A K L N L E I E E D Q Q H P E R Y P I M N S A F I Q F N H Q V A A H M A C Q S V T Y H I P -  
 K Q M A P R V E I S P N D V I W D N M A I K W W H E W A R S A L V F A V V T G M L V L W A F P V A W T A S L A Q L D A L V E  
 K Y S W L H W L K T I H V I K G -  
 V A G V L P A A V L A I L L I L V P I A L D W L A T F Q G A K T G S Q T T E T V Q T Y Y F A F L F V Q V F L V V S I T S S T F Q T I A  
 N I T Q D I T S T P E V L A E N L P K A A N Y F F S Y M I L Q A L S T S S G T L L Q I G T L F M W Y I M A R K W T N T Q L P S V T  
 W G S F F P V Y T N F A C I A L I S V V A P L I S I F A I I T F A L L W C A H R Y N M L Y V T R F R T D T G G V L Y P R A I N Q T F  
 T G L Y V M E L C L I G L F F L A V C V P Q A I I M I A L I F T I L Y Q Y L L N R S F G P L L R Y L P I T F E D A E A P E E R D V L R K  
 A F Q H Y

>Neurospora\_crassa\_XP\_962626.1

KEPVSLSGMIVTLVPILITSAIYLAIFLVL--RKSNNRRYYAPRTYLGSE-  
NERSPSNGLFSWVKDFWKIPDVYALQHQSLDAYLYIRYLMAVTICFVGCCITWPVLFVFNATG  
GN--G-  
KQLDILTYGNIETRYNRYAHVFISWIFFGFVMYLIMRECIFYINLRQAFLISPLYSQRISRTVLF  
SVPEPYLDEQRLRKVFG-  
ASVKNVWITSETKEVDELVEERDKVAMRLEKAEVKLIKLANNRKPTHRLIGKKVDTIDWCREELT  
RLIPEAEAAQDKYRAFKKVPGVFIEFRTQADAEGAAQILAHHRG-  
LHMTPKIGIRPNEIVWKSALIPWWQRVIRRYAVYAFITAMIIFWAIPVGVVGIISNVNYL-  
KTISFLTWLDDIPFILGAVTGLLPSIALSILMSLVPIVIRICAKLSGEPSSRVELFTQHAYFAFQVIQ  
VFLVATVASSATAVAKQIADNPGSVTKLLSENLPKSSNFYISYFIVQGLSIATSVLTQVVGFFVFN  
LVYKLYTWANLSAISWGSTMPVYTNIVVIAIAYATIAPLMLGWATVAMGLFYLAWRYNVLFVTD  
QIDTRGLIYPRAIKQLYTGIYLAEICMIGLFGASVAPGPLVLMVIFLIFTILFHISMNAALNPLLYNLP  
LTLAEE-PYTEEVERDAYCPP

>Neurospora\_crassa\_XP\_964945.1

YVRPGNKDTWYQFIISVSLGISAFALFCALRPRWKS--LYASRKA-----  
DTFFGWMGTLRYVTERQVLASAGLDAYVFLNFFKMAMKLFVIFFFALAVLEPINRAFPDDLNTY  
PYGHTTLYD-KKSKRYLWSYLVFTYFFTGLTLFLMNRETFKVLVRQDYLGTQ---  
STITDRTRFRLSGIPKDLRTEKDIKNLVEKGKVENVTLCRKWKELDDLMDKRQAILAKLEAYLLGN  
TTSDLRPRPQTR---RKTDAIDYYTEKLRVLDQIRAARK--  
HYEPTDLAFVTMDSIAACQMAIQALIDPHP-  
GQLLTKPAPAPSDIEWRNTYASRLTRRVRVAVTLFVAFVTVVWLVPAFLASFLSICTIEAYFK  
GFAMWLKQYLARALVQTGLPTAVVSLNVAVPYFYDYSYQQGMLSRGDAALSTISKNFFFTFF  
NIFLIFTVFGAVTSIIESLKDT-  
TYIAYVLASKIENLGVFYTNFIMLQIGLFPFRLLQFGSVSLYPINRIFAQIVSPPMFYGFYLPTA  
LLVFILCLVYSALPQKVGLGVAYFTLGYFTYKYQLLYAMEQPAHATGGAWNMICYRIMLGLLVF  
QLTMSGYLALRKAFTAALLVSPLLIITVWYGYSFRRHFELTKFIALRSIRGETLDEDKEKGAKFV  
NP

>Oryza\_sativa\_indica\_A2Y4C8

---GSLTDIGVAAGINILSALGFLLAFVLRIPINDRVYFPKWYLKG--  
TRSSPRIRFLNWMPAALQMPEPELIEHAGLDSAVYVRIYLLGLKIFVPIAVLAFIVLVPINWASGTL  
EKYDQIDKLSISNLGKSGKRFWAHIVMAYVFTFWTFFVLYREYKVVTTMRLRFLAIQN--  
RRADQFTVLVRNVPPE-  
TVSEHVEHFFAVDHYLSHQTVYNANTLAGLVEQKKGLQNWLVYYENQHAKNPAK-  
KPTMKTWGRVDAIEHYTTAIEELCKQEDEERHKVIPNAIMPAAFVSFKSRWGAAVCAQTQQT  
SNP-  
TLWLTEWAPEPRDVFVWPNAIPFVELSVRRLIMAVALLFFLTFMFIPIAVQSMANLDDIERMLPF  
LKPIIERNLSKIVQGFPLGIALKIFLILLPTFLVMMSKIEGHTSLSGLDRRTASKYYLFLVNVFLG  
SVITGTAFQQLNFIQSANKIPEIVGESIPMKATFFITYVMVDGWAGVAAEVLRLKPLVMFHAKNT  
REQAMDPGSLDFGTTEPRIQLYFLLGLVYAVVTPILLPFIVFFSLAYLVFRHQIINVYNQQYESGA  
QFWPDVQRRLVIALIVSQILLGLLSTQEAEKSTVALLPLPVLISWIFHYVCKGRFEPAFIKFPLQD  
AMVKTLLNREYLKDAYVHP

>Oryza\_sativa\_indica\_A2Y857

---ATVSDIGLSAAINVSMAVAFLLVFAFLRLQPINRVYFPKWYLRG--  
MRDSPVLKFLSWMPAALKMPEDELINHAGLDSAVYLRIYLTGIKIFVPISILASLVLPVNWNTNDT  
LD-HSKIDKLSISNIPYGSNRFVTHLMAYAVTFWTCYVLFREYEIITMRLRFLASEK--  
RRPDQFTVLVRNIPPE-  
SISELVEHFFLVLDHYLRHQVVYNANKLADLVEKKKKLQNWLDYYQLKYERNPSK-  
RPTTKTFGSEVDAIEYYKAEIEKIGKEEADERQKIMPQSAVPAAFVSFRSRWGAAVCAQTQQT  
NP-  
TWWITEWAPEPRDVYWNLSIPFVSLTVRRLIVAVAFFLNFYVPIAFVQSLASLEGIEKALPFL

KPLIKIDVIKSFIQGFLPGIALKVFLILLPTILMFMSKFEGGLISQSSLERRSASKYYIFLFFNVFLGSIV  
TGSALDQLKAYIQSANEIPRTIGVAIPMRATFFITYVMVDGWTGVAGEILRLRALIIFHLKNFREEA  
MDPGSICFDWCEPRIQLYFLLGLVYAVVTPLLLPFILVFFGLAYVVYRHQIINVYNQQYESGAQF  
WPSVHGRIIIALIVSQQLLIGLLSTKGFEEETPVLVLPVLTFWFYKYCKNRFEPAFVRNPLQEAM  
RKTFDLKAYLANAYLHP

>Oryza\_sativa\_indica\_A2YI72

----DTASFVTSLLTSFVIFVVLVLFVFTWLSSRPGNAPVYYPSVLLRG-----  
RSPVGWLRQAISASEGDVVAAGGVDAAVYLVFLSSVLSILVFSGIVLLPVLLPVAATDDNLNLF  
ELEKLALGNVQEHSRRLWAFLLSVYVVSFVTYFVLWKSYPKHVSNMRAAARSTPD--  
VKPEEFVAVLVRDVPKDKQTIKDSVDSYFRADTFYRSMVVTDHTKADKIYQEIEGHKQKIARAEV  
YAESKTGTPHRIIGKKVDTIEYCNDQIKELLPKLEAEQKTTLLKQ--  
QQAIVFFNRRSAAASASQTLHAQMF-  
DKWTV EQAPEPRQIIWSNLSKKIYERQIRQVVVYIVFVTVVYFYMIPITAISALTTLEKLREKLPFLK  
VVVDQPKIKTVLQAYLPQLALIVFLALLPSLLMFLSKLEGIPSQGHVRAAAGKYFYFIVFNVFLG  
VTISSTLFSALTTIINNPPGIVNMLASSLPGSATFFLTFVALKFFVGYGLELSRLVPLIIFHLKRKVR  
AAWAPGDLGYNTRVPNDMLIVTIVLCYSVIAPLIIPFGVAYFALGWIIAKNQVLRVYVPSYESNGR  
MWPMMHTRIIAALLIYQITMVGIVLLKFLYS-PVLVPLIPISFIFAYICHMRFYPAFAKTPLEVQ-  
----AVYTSYIPA

>Oryza\_sativa\_indica\_A2ZAL4

---ATLPDLGVSAFINILGAFVFLIFAAALRLQPINDRVYFPKLYLTG--  
RRHHPHLRFLAWVPGALRMSQPDLIHHAGLDSAVYLRIYTLGLKIFLPIMTVALLVLIPVNVSGGT  
LLNFSDIDKLSISNVNPGSNRFFIHLIMAYVFTFWTCFMLYKEYSNVAFMRLHFLASQK--  
RCADQFTVIVRNIPHH-  
STSETVDEFFRRDHYLGQQAVYNANRYAKLVKKKERLQNWLDYYQLKFERHPGK-  
RPIGRTCGREVDQIDYYRARISELDKKLASERQRVLPKAVMPVAFVTFDSRWGAAVCAQTQQS  
KNP-  
TQWLTDWAPEPRDVYWQNLAIPIFFSLSIRKFLISIAVFALVFFYMIPIAFVQSLANLEGIEKVAPFL  
RPVIDAPVVKSFLQGFLPGLALKIFLYILPTVLMIMSKVEGYVLSLSSLERRAASKYYYFMLVNVFL  
GSIAGTAFEQLNAFFQPPSQIPRTIGVAIPMKATFFMTYIMVDGWAGIANEILRVKPLVIYHLKNM  
RERAMDPGSIAGLAEENLPSLQLYFLLGLVYAVVTPILLPFIIFFAFAFLVYRHQIINVYNQYEEESAAA  
FWPQVHSRIIASLLISHVTLFGLMSTMKAAYSTPLLIFLPLLTWIFHKYCKSRFEPAFRKYPLEEA  
MEKNLNLKSYLQNAYLHP

>Oryza\_sativa\_indica\_B8A969

----DAEGLLASAAINLGLALVALSLFSLKQPGNAPVYLARRMAA-----  
TPSFRWIRAALRSEDVLRHGLDALVVVRLFKFGIKCFVCSIVGLFILAPTNYSCEGLQDSN  
SMELFTVSNVARGSNRLWVHFACLCFISFYVYLLHKEYKEMSSRRIAHLKYHR--  
KRPDQFTILVRGIPLHGTYGADHFFSKQTYQSYHIVHDIGNIEALQKLASSLEDKIKRK-----  
-RETRRCLTLEAIDTRKLEEKLVHHSIRLLQCENMRK-  
ELPVAFVVSFKSQLDAAQAEMQQHVNP-  
LSLVTTYAPEPPDALWTNLAIPFCRIAIYKLGVFIAAFLLVFFFTIPVTAVQGIVQFEKIKIWFPPARA  
VELIPGLNSVVTGYLPSMILNGFIYLIPFAMLGMAFEGCIAKSQKEIKACNM-----  
IGESFTHPKDIPSRALARAVSAQSDFFITYILTDGMSGFSLEVLQFGLLTHWFFKAHQPYLY---  
GFPYYRVVPIVSLAVLIGLVYAVVAPLLLPIVYFLLGYAVYINQMEDVYEITYDTCGQYWPNIHR  
YIFLSVTLMQITM-----LSKPGASFATVPLLSTILFNEYCKVRFLPTFLRRPVQVAKEN-  
RGDLDHASAYKPP

>Oryza\_sativa\_indica\_B8A9P0

---ATIQDIGVSAAINILSAITFLLAFALRLQPINDRVYFPKWYLKG--  
ARESPSLKVLVSWMPAALKMPEDELISHAGLDSAVYLRIYLIIGLKIFAPITVLAFIILVPVNWNTITLQ  
-HSDIDKLSISNIPVGSKRFAAHLTMAYVFTFWTCYVLLREYEIVATMRLRFLASEK--  
RRPDQFTVLRNIPPE-  
SIGELVEHFFLVLDHYLTHQVVYNANKLDMVKEKKMQNWLDYYQLKYERNTSQ-

RPTTKTFGSKVDAIEYYTSEIERIEKEETDERGKIMPKSVVPAAFVSFRSRWGAAVCAQTQQTS  
NP-  
TVWLTEWAPEPRDVYWDNLSIPFVYLTIIRLIIAVAFFFLNFFYVLPPIAFVQSLANIEGIEKAAPFL  
KPLIEMRTIKSFIQGFLPGIALKIFLILLPSILMFMSKVEGLTSVSSLERRSAFKYYIFLFFNVFLGSII  
AGSALEQLKTFLQSANEIPRTIGEAIMKATFFITYVMVDGWAGVAGEILRLKPLIIFHLKNFREEA  
MDPGSIGFDSNEPQIQLYFLLGLVYAVVTPFLLPFILIFFGLAYVVYRHQIINVYNQEYESAAAFW  
PSVHGRIIIVALIVSQQLLLGLLSTKGAGQSTPVLLVLPVVTFFYFYKYCKNRYEPAFVEYPLQDAM  
RKGFDLKGYLMNAYIHP  
>Oryza\_sativa\_indica\_B8ACM4  
----KISGLLTSAGINIALSVLFISLVLRKQPANVRVYFGRRIAE-E-HNR---  
VPSTGWIVKALQCTEEEEILAAAGLDAVVFNRILVFSLRIFSLAAILCVFGILPLNYFGQDI--  
SESLDIFTIGNVKVRSRWLWVHCVALYIISGVACILLYLEYKHARLRLRHLTCAM--  
PNPSHFTVLVRGIPKE-  
SCSNAIDDFFTKSSYLFHQVVYKVGKVQKIMTGAKKAYRKFKHFTDSTIDQ----  
RCRAISCGASSNSFQLLATGLEQNGKSDLQDSSLKQD-  
ECAAAFVYFRTRYAALVASEILQTSNP-  
MKWVTDLAPEPDDVYWSNLWLPYKQLWIRRIATLLGSIVFMLFFLIPVTFIQGLSQLEQLQQRLP  
FLKGILEKKYMSQLVTGYLPSVILQIFLYAVAPIMILFSTLEGPISHSERKRSACCKVLYFTVWNIF  
FGNVLSGTVISQLNVLS-  
SPKDIPVQLARAI PVQATFFITYVLTSGWASLSSELMQLFGLIWNFVRKYTEFVP---  
SFPYHTEVPKVLLFGLLGFTCSVLAPLILPFLLYFFLGYIVYRNQLLNVYRTRYDTGGLYWPIAH  
NAVIFSLVLTQIICLVFGLKESPVAAGFTIPLIILTLLFNQYCRNRLPLFRTPAQDLIDMMDEIH  
HRLHSAYCQF  
>Oryza\_sativa\_indica\_B8AMU4  
EPEAWYGSIQYLVNISAVGAASCVLLFLLVKLRFDHRR-----  
SALAAKLLAVYHATAPQIALHCGADAAQFLFERASFLVLA AVAAA VAAALPLNLLAGDA--  
ADQFAATTISHIPKSSPLLWLHLLTA AVVAIAHLGISRMEDALRITRFRD-----  
NSSSVAVFTIMIQQIPKTLAADKTLKDYFEHGKVYRVIVPFDLCTLEYLAE EWGKVRNRISWLEA  
RMDARNL-----EEMLRRLQTKKLVLSGRLSDYKDG--  
RAPGAGIAFVVKDVYTANKAVRDFREP VQLERWTVERAPPASDIWNHLGLSKTSLGLRRIAV  
NTCLILMLLFFSSPLAIISGMQSAARIINAKSWLVWLQSS-  
WFWTIIFQFLPNVLI FVSYIIIPSVLSYFSKFECHLTVSGEQRAALLKMVCFFLVNLILLRALVSSL  
ESWGCYLDSDQ-  
IQYLSPSFSLSRSSLSSLAFLITCTFLGISFDLLAPIPWIKHVMKKFNRSHPKQTFDFAQYYAFDIT  
IFALTMIYSLFAPLTPVGVAVYFGYRYLVDKYNFLFIYRVGGNDGKLMDMVICIMQFCVIFFLVA  
MLLFFAVQGDPMKLAICTLGLLVFY--KLLSDRFQPSLEGMQTN SF-----VDGPTDYEVSQP  
>Oryza\_sativa\_indica\_B8AP47  
----KVGALLTSAGINISLCILFSLYSVLRKQPQNVKVFGRRIAE-E-NSR---  
VPSASWILRSLRCTEDEL L ATAGLDAVVFNRILVFSIRIFSLAAFLCVLGVLP LNYFGQDM--  
SASLETFTIGNMQERSRWLWVHCVALYIISGVACLLLYLEYKHARLRL LHVSRAS--  
TNPSHFTVLVRGVPKE-  
SISCTVESFFTKSSYLSHQIYKVGKLQKIVTGAKKAYKKFKHFKGTTVDQ----  
RCGPITCGASSKSFELLPEPEQEMKKHDVKDSELSDK-  
DCGA AFVFFKTRYAALV VSEIVQTSNP-  
MEWVTS LAPDRDDVYWSNLWLPYKQLWIRRIVTLSGSIVFMFLIPVTFIQGLTQLEQLQQRLP  
FLNGILKKYITQLVTGYLPSVILQIFLYTPPTMMFFSTLEGPVSHSERKRSACCKVLYFTIWNV  
FFVNVLSGSAISQVNALS-  
SPKDIPMVLARAVPVQATFFTTYVLTSGWASLSSELMQLFGLTWNFIMKYSYFVP---  
SFPYHTEVPKVLLFGLLGFTCSVLAPLILPFLLYFFLGYVVYRNQFLNVYCTKYDTGGLYWPIA  
HYTTIFSVL TQIICLVFGLKESPVAAGFTVPLIILTLLFNQYCSNRLRPLFKTLPAQDLIDMMDDI  
HRLHSAYCQF

>Oryza\_sativa\_indica\_B8AR42  
----EFSALLTSAGINIGLCALLLSLYSVLRKQPHNYGVYFGRRLAE-E-KFR---  
LPTAGWIVKAYWCTEEEEIRRVAGLDSVFLRLFIFSIRIFSITSLVCIFGVLPVNYHGKET--  
AESLNVTIANLKEGSRMLWVHCVALYVITISACILLYEYKYISRKRLAHITGSP--  
PDPGHFSVLVRSIPKE-  
LLDDTIRNFFVNSSYLSHQMIYRKGSMQKFVDNAERVYRKVVRVKMSSFGQ----  
SRRSDLCGVRASSFQQYRNKFINSKK-PDLSDEVIQK-  
DCPGAIVFFKTRYAAIVASRILQSSNP-  
MLWVTDFAPEPRDVYWSNLWIPYRQIWLRIATLAASVAFMFVIVPVAFVQSMMLDQIEQLF  
PSLKNMLKPPFFVKLVGTGYLPSVLLLSLYTVPPMMFFSSIEGSISSRSGRKKSSACCKILFFTIV  
NVFFVNVLSGSLNQLNVFT-  
RPRDMPSMLAELVPKQATFFITYVLTSGWASLCSEILQVYNLVYNFFRKCPEYGY---  
SFPYHTEVPKVLLFNLLGFTFSIMAPLILPFLLYVFCGLYLVYRNQILNVYYPKYEMGGKLVPIMH  
STLVFALVLTQTIALGVFTIKHATISSGFTILLIIGTVLFHQYCRHRFSSIFNSFSAQDLIEMMEEIHK  
HLLDAYSQG

>Oryza\_sativa\_japonica\_Q10S28  
EPEAWYGSIQYLVNISAVGAASCVLLFLLVLRFDHRR-----  
SALAAKLLAVYHATAPQIALHCGADAAQFLFERASFLVLAAVAAAATAALPLNLLAGDA--  
ADQFAATTISHIPKSSPLLWLHLLTAAVVAIAHLGISRMEDALRITRFRD-----  
NSSSVAVFTIMIQQIPKTLAADKTLKDYFEHGKVYRVIVPFDLCTLEYLAEWGWKVRNRISWLEA  
RMDARNL-----EEMLRRLQTKKLVLSRSLSDYKDG--  
RAPGAGIAFVVKDVYTANKAVRDFREPQLERWTVERAPPASDIYWNHLGLSKTSLGLRRIAV  
NTCLILMLLFFSSPLAIIISGMQSAARIINAKSWLVWLQSS-  
WFWTIIFQFLPNVLIQVSYIIIPSVLSYFSKFECHLTVSGEQRAALLKMVCFLLVNLILLRALVSSL  
ESWGCYLDSDQ-  
IQYLSPSFLSRSSLSSLAFLITCTFLGISFDLLAPIWIKHVMKKFNRSHPKQTFDFAQYYAFDIT  
IFALTMIIYSLFAPLTPVGVAVYFGYRYLVLDKYNFLFIYRVGGNDGKLMVMVICIMQFCVIFFLVA  
MLLFFAVQGDPMKLAICTLSLLVYF--KLLSDRFQPSLEGMQTNF----VDGPTDYEVFSQP

>Oryza\_sativa\_japonica\_Q2QLP9  
----KISGLLTSAGINIALSVLFISLYSVLRKQPANVRVYFGRRIAE-E-HNR---  
VPSTGWIVKALQCTEEEEILAAAGLDAVVFNRLVFSLRIFSLAAILCVFGILPLNYFGQDI--  
SESLDIFTIGNVKVRSRWLWVHCVALYIISGVACILLYEYKHARLRLRHLTCAM--  
PNPSHFTVLVRGIPKE-  
SCSNAIDDFFTKSSYLFHQVVYKVGKQKIMTGAKKAYRKFKHFTDSTIDQ----  
RCRAISCGASSNSFQLLATGLEQNQGKSDLQDSSLKQD-  
ECAAFAVYFRTRYAALVASEILQTSNP-  
MKWVTDLAPEPDDVYWSNLWLPYKQLWIRRIATLLGSIVFMLFFLIPVTFIQGLSQLEQLQQRPL  
FLKGILEKKYMSQLVTGYLPSVILQIFLYAVAPIMILFSTLEGPISHSERKRSACCKVLYFTVWNIF  
FGNVLSGTVISQLNVLS-  
SPKDIPVQLARAIPVQATFFITYVLTSGWASLSSELMQLFGLIWNFVRKYTEFVP---  
SFPYHTEVPKVLLFGLLGFTCVSLAPLILPFLLYVFFLGYIVYRNQLLNVYRTRYDTGGLYWPIAH  
NAVIFSLVLTQIICLVFGLKESPVAAGFTIPLIILTLLFNQYCRNRLLPLFRTPAQDLIDMMDEIH  
HRLHSAYCQF

>Oryza\_sativa\_japonica\_Q5JKX1  
----DAEGLLASAAINLGLALVALSLFSLKQPGNAPVYLARRMAA-----  
TPSFRWIRAALRLEDDVLRHGLDALVVVRLFKFGIKCFVCSIVGLFILAPTNYSCEGLQDSN  
SMELFTVSNVARGSNRLWVHFACLCFISFYVYLLHKEHKEMSSRRIAHLYHR--  
KRPDQYITLVRGIPLHGTYGCYADHFFSKRTYQSYHIVHDIGNIKALQKLASSLEDKIKRK-----  
-RETRRCLTLEAIDTRKLEEKLVVHHSIRLLQCENMRK-  
ELPVAFVFSKSQLDAAQAEMQQHVNP-  
LSLVTTYAPEPPDALWTNLAIPFCRIAYKLGVFIAAFLLVFFFTIPVTAVQGIVQFEKIKIWFPPARA

VELIPGLNSVVTGYLPSMILNGFIYLIPFAMLGMAFEGCIAKSQKEIKACNMVFYFLLGNVFFLSI  
LSGSLHMQIGESFTHPKDIPSRLARAVSAQSDFFITYILTDGMSGFSLEVLQFGLLTHWFFKAHQ  
PYLY---  
GFPYYRVVPIVSLAVLIGLVYAVVAPLLLPILVYFLLGYAVYINQMEDVYEITYDTCGQYWPNIHR  
YIFLSVTLMQITM-----LKSKPGASFATVPLLSTILFNEYCKVRFLPTFLHRPVQVAKEN-  
RGDLDHASAYKPP  
>Oryza\_sativa\_japonica\_Q5JLH8  
---ATIQDIGVSAAINILSAITFLLAF AFLRLQPINDRVYFPKWYLKG--  
ARESPSLKVL SWMPAALKMPEDELISHAGLDSAVYLRIY LIGLKIFAPITVLA FII LVPVNWTNITLQ  
-HSDIDKLSISNIPV GSKRFAAHLT MAYVFTFWTCYVLLREYEIVATMRLRFLASEK--  
RRPDQFTVLRNIPPE-  
SIGELVEHFFLVDHYLTHQVVYNANKL DKM/VEKKKMQNWLDYYQLKYERNTSQ-  
RPTTKTFGSKVDAIEYTTSEIERIEKEETDERGKIMP KSVVPAAFVSFRSRWGAAVCAQTQQTS  
NP-  
TWWLTEWAPEPRDVYWDNLSIPFVYLTIRRLIIAVAFFFLNFFYVLP IAFVQSLANIEGIEKAAPFL  
KPLIEMRTIKSFIQGF LPGIALKIFLILLPSILMFMSKVEGLT SVSSLERRSAFKYYIFLFFNVFLGSII  
AGSALEQLKTFLQSANEIPRTIGEAI PMKATFFITYVMVDGWAGVAGEILRLKPLIIFHLKNFREEA  
MDPGSIGFDSNEPQIQLYFLLGLVYAVVTPFLLPFILIFFGLAYVVYRHQIINVYNQEYESAAAFW  
PSVHGRIIIVALIVSQLLLLG LLSTKGAGQSTPVLLVLPVVTFFYFYKYCKNRYEP AFVEYPLQDAM  
RKGFDLKG YLMNAYIHP  
>Oryza\_sativa\_japonica\_Q5TKG1  
---ATVSDIGLSAAINVSMAVAFLLVFAFLRLQPINDRVYFPKWYL RG--  
MRDSPVLKFLSWMPAALKMPEDELINHAGLDSAVYLRIYLTG I KIFVPISILASLVLPVNWTNDT  
LD-HSKIDKLSISNIPYGSNRFVTHLVMAYAVTFWTCYVLFREYEIITMRLRFLASEK--  
RRPDQFTVLRNIPPE-  
SISELVEHFFLVDHYLRHQVVYNANKLADLVEK KKLQNWLDYYQLKYERNPSK-  
RPTTKTFGSEVDAIEYYKAEIEKIGKEEADERQKIMPQSAVPAAFVSFRSRWGAAVCAQTQQTS  
NP-  
TWWITEWAPEPRDVYWNLSIPFVSLTVRRLIVAVAFFFLNFFYV IPIAFVQSLASLEGIEKALPFL  
KPLIKIDVIKSFIQGF LPGIALKVF LILLPTILMFMSKFEG LISQSSLERRSASKYYIFLFFNVFLGSIV  
TGSALDQLKAYIQSANEIPRTIGVAIPMRATFFITYVMVDGW TGVAGEILRLRALIIFHLKNFREEA  
MDPGSICFDWCEPRIQLYFLLGLVYAVVTPLLL PFILVFFGLAYVVYRHQIINVYNQQYESGAQF  
WPSVHGRIIIALIVSQLLLIGLLSTKGFEETTPVLVLPVLT FWFYKYCKNRFEP AFVRNPLQEAM  
RKTFDL KAYLANAYLHP  
>Oryza\_sativa\_japonica\_Q6AU79  
---GSLTDIGVAAGINILSALGFLLAFVLR IQPINDRVYFPKWYLKG--  
TRSSPRIRFLNWMPAALQMPEPELIEHAGLDSAVYVRIYLLGLKIFVPIAVLAFIVLVPINWASGTL  
EKYDQIDKLSISNLGKGSKRFWAHIVMAYVFTFWTFFVLYREYKVVTTMRLRFLAIQN--  
RRADQFTVLRNVPPE-  
TVSEHVEHFFAVDHYLSHQTVYNANTLAGLVEQK KGLQNWL VYYENQHAKNPAK-  
KPTMKTWGKRVDAIEHYTTAIEELCKQEDEERHKVIPNAIMPAAFVSFKSRWGAAVCAQTQQT  
SNP-  
TLWLTEWAPEPRDVFVWP NLAIPFVELSVRRLIMAVALLFFL TFFFMIPIAIVQSMANLDDIERMLPF  
LKPIIERNLSKSIVQGFLPGIALKIFLILLPTFLVMMSKIEGHTSLSGLDRRTASKYYLFLFVNVFLG  
SVITGTAFQQLNNFIQSANKIPEIVGESIPMKATFFITYVMVDGWAGVAAEVLRLKPLVMFH I KNT  
REQAMDPGSLDFGTTEPRIQLYFLLGLVYAVVTPILLPF IIVFFSLAYLVFRHQIINVYNQQYESGA  
QFWPDVQRRLVIALIVSQLLLIGLLSTQEA EKSTVALLPLPVLSIWFHYVCKGRFEPAFIKFPLQD  
AMVKTNLNREYLKDAYVHP  
>Oryza\_sativa\_japonica\_Q6ZLQ0  
----DTASFVTSLLTSFVIFVVLVLFVTLWSSRPGNAPVYYPSVLLRG-----  
RSPVGWLRQAISASEGDVVAAGGVDAAVYLVFLSSVLSILVFSGIVLLP VLLPVAATDDNLNLF T



ELEKLALGNVQEHSRRLWAFLLSVYWVSFVTYFVLWKSYSKHVSNMRAAARSTPD--  
VKPEEFAVLVRDVPKQDTIKDSVDSYFRADTFYRSMVVDHTKADKIYQEIEGHKQKIARAEVV  
YAESKTGTPHRIIGKKVDTIEYCNDQIKELLPKLEAEQKTTLKQ--  
QQAIVFFNRRSAAASASQTLHAQMF-  
DKWTVQEAPEPRQIIWSNLSKKIYERQIRQVVVYIVFVFLTVVYFYMIPITAIASALTTLEKLREKLPFLK  
VVVDQPKIKTVLQAYLPQLALIVFLALLPSLLMFLSKLEGIPSQGHVRAAAGKYFYFIVFNVFLG  
VTISSTLFSALTTIINPPGIVNMLASSLPGSATFFLTFVALKFFVGYGLELSRLVPLIIFHLKRKVR  
AAWAPGDLGYNTRVPNDMLIVTIVLCYSVIAPLIIPFGVAYFALGWIIVKNQVLRVYVPSYESNGR  
MWPMMHTRIIAALLIYQITMVGIVLLKFLYS-PVLVPLIPISFIFAYICHMRFPYPAFAKTPLEV-VH-  
----AVYTSYIPA  
>Oryza\_sativa\_japonica\_Q75GI5  
----EFSALLTSAGINIGLCALFLSLYSVLRKQPHNYGVYFGRRLAE-E-KFR---  
LPTAGWIVKAYWCTEEEEIRRVAGLDSVFLRLFIFSIRIFSITSLVCIFGVLPVNYHGKET--  
AESLNVTIANLKEGSRMLWVHCVALYVITISACILLYEYKYISRKRLAHITGSP--  
PGPGHFSVIVRSIPKE-  
LLDDTIRNFFVNSSYLSHQMIYRKGSMQKFVDNAERVYRKFVRVKMSSFGQ----  
SRRSDLCGVRASSFQQYRNKFINSKK-PDLSDPVEVIQK-  
DCPGAIVFFKTRYAAIVASRILQSSNP-  
MLWVTDFAPEPRDVYWSNLWIPYRQIWLRIATLAASVAFMFVIVPVAFVQSMMQLDQIEQLF  
PSLKNMLKKPFFVKLVTGYLPSVLLLSLYTVPPLMMFFSSIEGSISRGRKKSACCKILFFTIWN  
VFFVNVLSGSVNLQNLNVFT-  
RPRDMPSMLAELVPKQATFFITYVLTSGWASLCSEILQVYNLVYNFFRKCPEYGY---  
SFPYHTEVPKVLNLLGFTFSIMAPLILPFLLYVFLGYLVYRNQILNVYYPKYEMGGKLVPIMH  
STLVFALVLTQTIALGVFTIKHATISSGFTVLLIIGTVLFHQYCRHRFSSIFNSFSAQDLIEMMEEIH  
KHLLDAYSQG  
>Oryza\_sativa\_japonica\_Q75LY2  
----KVGALLTSAGINISLCILFLSLYSVLRKQPQNVKVFYFGRRIAE-E-NSR---  
VPSASWILRSLRCTEDELATAGLDAVVFNRLVFSIRIFSLAAFLCVLGVLPVNYFGQDM--  
SASLETFTIGNMQERSRWLVVHCVALYIISGVACLLLYEYKHIARLRLHVSRSAS--  
TNPSHFTVLRGVPKE-  
SISCTVESFFTKSSYLSHQIYKVGKLQKIVTGAKKAYKKFKHFKGTTVDQ----  
RCGPITCGASSKSFELLPVEPEQEMKKHDVKDSELSDK-  
DCGAAFVFFKTRYAALVVSEIVQTSNP-  
MEWVTS LAPDRDDVYWSNLWLPYKQLWIRRIVTLSGSIVFMFLFLIPVTFIQGLTQLEQLQQRPL  
FLNGILKKYITQLVTGYLPSVILQIFLYTVPPTMMFFSTLEGPVSHSERKRSACCKVLYFTIWNV  
FFVNVLSGSAISQVNALS-  
SPKDIPMVLARAVPVQATFFTTYVLTSGWASLSSELMQLFGLTWNFIMKYSYFVP---  
SFPYHTEVPKVLNLLGFTCSVLAPLILPFLLYVFFLGYVYRNQFLNVYCTKYDTGGLYWPIA  
HYTTIFSIVLTQIICLVGFLKESPVAAAGFTVPLIILTLLFNQYCSNRLRPLFKTLPAQDLIDMMDDI  
HHLHSAYCQF  
>Oryza\_sativa\_japonica\_Q7XBT3  
---ATLPDLGVSFAFINILGAFVLLIFAALRLQPINDRVYFVKLYLTG--  
RRHHPHLRFLAWVPGALRMSQPDLIHHAGLDSAVYLRIYTLGLKIFLPIMTVALLVLIPVNVSGGT  
LLNFSDIDKLSISNVNPGSNRFFIHLMLMAYVFTFWTCFMYKEYSNVAFMRLHFLASQK--  
RCADQFTVIVRNIPHH-  
STSETVDEFFRRDHYLGQAVYNANRYAKLVKKKERLQNWLDYYQLKFERHPGK-  
RPIGRTCGREVDQIDYYRARISELDKKLASERQRVLPKAVMPVAFVTFDSRWGAAVCAQTQQS  
KNP-  
TQWLTDWAPEPRDVYWNLAIPFFSLSIRKFLISIAVFALVFFYMIPIAFVQSLANLEGIEKVAPFL  
RPVIDTPVVKSFLLQGLPGLALKIFLYILPTVLMIMSKVEGYVSLSSLERRAASKYFFMLVNVFL  
GSIIAGTAFEQLNAFFQPPSQIPRTIGVAIPMKATFFMTYIMVDGWAGIANEILRVKPLVIYHLKNM

RERAMDPGSIGLAENLPQLYFLLGLVYAVVTPILLPFIIFFAFAFLVYRHQIINVYNQEYESAAA  
FWPQVHSRIIASLLISHVTLFGLMSTMKAAYSTPLLIFLPLLTWIFHKYCKSRFEPAFRKYPLEEA  
MEKNLNLKSYLQNAYLHP

>Ostreococcus\_lucimarinus\_XP\_001416012.1

RFATSDRDIYVGLGIYATIAFLGLLLFGRMRHVMP---IYFGRLLLT----  
KPPPPRYFYGWIPHILRVDDKTLIQTAGLDFAFLRVCQFGLQLFVPLSIFSMILLPIHVNDDM  
VRPGLLITTVANIPGKQGVWLHTVGMWLMVLYTTWLLKQHSATFVVLRTLYLTTRDVSVA  
SSYTVLITDIPFEEVRVGVVEATLEYDEFRGLIPIFDHRPADALLDSRDECKNMITMIRPPKNLRK  
L-----ALSEQVAVLEAQLEAIDEAIIICVRKTT-EGSPGPCAFVAVFENQVSASTAAQCVIS--  
RASVYRALPAPGPDDVNWPTLLHNSTDNRARALAIWPFIIALM---  
IFPTGMFATVTSVCQVRNSGAWY---CSD-  
VYAAISGVLPPIILTLLVVFVISFYMMYLVQQNVHVS LAATDRRFLRFYWAWGALNVLLGGIFGG  
A-

LSLFTTTLSSSSEVQLQFGRVLPSSNFFLLFIVFRAIYLPVQRLLLPHPGSFCLAADIKTRLYSPR  
AVRMGRETGVFMLIMVIGLTFVCIAPLIPLAAALFYITNFVIWRYHVLYVYERGYESNGSVWFTFT  
QLVILSLVVAQTFLSCLVFSKQAYIQGAVLATVPYYLFKVVYRKFRAEFGSASWAVPLEAT---  
AAPPTDFGGEIYTHP

>Ostreococcus\_lucimarinus\_XP\_001417492.1

DTQIAMSEVGTLVGSYAGLFSFLLILFVMLRKIVWLRMAIDSA-----  
REIQIPKPDNAWSWLYDAYHRDNNWMKEFTTPDEYMLVRWFKLSSRFFFTAGAVCCPILMSLY  
AADTVPSAKSGIAKYTLLNARTESS-FAAAMAFTWITSLFLISLIRVESRKYVHMMWTV-----  
DKTGIKANAILVKDMPLKIFDDEELGRFKGTDCIAFKMLASDTRKLD SAAKAWANAREHVT-----  
-----

QNMQAIADLSTQLAKALKDMSLKRARYNHRPACSAVVVFARQMDAVIASQIQIDDVP-  
GQWVTEPAPGNSDVVWHNLSLTSVERAKTTQAFFIAVAISLFFMYPVNI AVAVADVKD--  
SLVS-----  
VFGESIYNIILSIVLTVFLVVGHILSLVVSQRGTGYVSVSAMDSFGASMYFWLLILNLVFSNLNTTPL  
WKDVLVWMQKPHLFTYQFILRLMNTSTFFLQFVMLRTATSPVLELIHPPVLLGFVTKCLKRLWA  
QPTPTPSHRVPAQTMLVFFIGIITVAVPVLVPCGVFFGFFYIFWKHNMVYHYIQQYSAGTSM  
WAWLVGKMYFSLVFSQIMVAFGLPLGFTMKYRVFIPLVLFVTLLEWSRVNTILNDAF-  
RVPVHAAGAAAEIEYKVKKGIWYAP

>Ostreococcus\_lucimarinus\_XP\_001421858.1

NTDVADA EVL SFAAYVCAALAVLTAFGIARKYVP---IYTGRELLK-  
TSGCAPRSTTYGWIAHVLTVADSDIVHTAGLDALVFLRIAQFGTQLFAPLALVGV LALAPTHLS  
RSYYETSHVLMRMTIANVEPTSSLMWMHVVMFWAFTAYALWLLTAHYRSYEF LRQVYGTTE  
VSVLVQNYCVLMTDV--AADPWEGVETFFGGDDFLMVIPLQDYRPVDDLLIERDKLKNEIEGH--  
RRMRGRS-----GFRDEITGLRDRVAILDHLVVQERTRI-  
QTEPGSSCIVAFKSQYAAACAAQCRI--  
SRQLFAIEPAPGPDNLNWQSVLLRRRQREIRSMVIFPLILTII---  
LIPTGMFTGMSSLCVANNHNDWY---CSS-  
YLRILVQGILPPILLTLWTFVVSFGMMYLVQQSKYSSLSKTDESFAEYFLWAFLNVFFGTVSGY  
AIQRYLNALNTKPDAMLQLLGTSLPLTSNFFLLWIVFRGVYLPTRQLIFPHPGVLCMIVNRRTIKY  
SPRSVRLGREVGVFAMVMMIGLVFSTVAPLITLLCTVFFVFNVIWRYHVLYVYERSYEAGGAM  
WTTFCNLTIYALVIAQSFLSFVLLSKQAYAGALILITVLPVLSKASHRFRSIASELRWSVPLQAS---  
IAPRAEFNAETYMHP

>Ostreococcus\_tauri\_Q01B23

DTKTTINDLMATTGVYASIFLLLVCFTGLRKIKWLRMAIDSA-----  
REIPLPKPDSAWSWLWDAYRDNEWMEFTTPDEYMLVRWFKLSSRFFFASGVLCCPLLIPL  
YVSDTVPSTRSGIAEYTLNARGGHS-FAAAVASCWIIISLFLMTMIRVESRKYIAMMWSV-----  
NKTGIKANAI VVKDMPL--IDDEDLGTKGT-----QTF----TEGNRXXXXXC-----  
MQAIDDL SKQLSKALQEVDLKRARYNQAPASSAIVVFARQMDAVIASQIQVDSVP-

GQWATEPAPGNSDVVWHNLSLTTVERARKTTQAWLIALSISVFFMYPVNAAVSITQEKT--  
ALVD-----  
FMGEQLYNVILSIVLTIFLVIGHILSLVVSRQTGFVAISSMDSFGASMYFWLLILNLVLGNLSDTPL  
WESIGQWISKPHLFTYQFILRLMNTSTFFLQFLLRCATSPVLELIHPPVLLGFVTKCLKRLWAQP  
TPTPSHRVPAQCMLVFFIGMIYAVVSPLLLPCVGLFFFFFYVFWKHNIYVHYIQQYSAGTSMWA  
WLVGKMYFSLMFSQIMIAFGLPLGYTMKYRAAILPIIALTAIEWARINIILKSAL-KVPV TSA---  
EEIEYKVKAGLWYAP  
>Ostreococcus\_tauri\_XP\_003083863.1  
NTDVADAEVLSAFVYVALSSLVLVLFALGALRDKVP---IYTGRTLLR-  
SSGSAPEMRRTFGWITSVLAISDEEVVNTAGLDALVFLRITQFGTQLFAPMAVIGAFALVPAHLS  
RSFYTSKHVLMRMTIANLEKRSELAWLHVCVFWVFTAYTLWLLDRHYQSIEFLRQVYGTTEV  
SVLIQNYCVLMTDV--SADSWQDIEKFFKGFDEFMLVIPLQDYRVVDDLLMEHDLRVNQEIQH--  
RRRRRGL-----SVIDEINSLRKRLATIEHLVVRERSNI-  
SAKPGPSCIVAFKSQYATAIAAQCRIT--  
SRQLFSIQPAPGPDNINWQSVLLRRHERKFRAVVIFPLILAVI---  
LIPTGMFAGLSSLCVANKQSSWY---CTN-  
YLRVVVQGILPPILLTVWTFVVSFGMMYLVQQSKYSSLRTDESFAKYYFLWAFNLVFFGTVSG  
FAIQRYVHALNTEVDAMFELVGTSLPLTSNFFLLWLVFRGVYLPTRQLIFPHAGVLCMIINRAIK  
YSPRSIRLGREVGVFAMVMMIGLVFSTVAPIITVVATFFYVFNFIWRYHVMFVYERSYESGMM  
WNTFCTLTISLMIAQFFLSFVLLSKEAYAAALALITILPVLRSRSMYKFRNLATELRWSVPLLA---  
SAPKAAFNAEAYIHP  
>Penicillium\_marneffeii\_B6Q4A7  
KEAIQLNAFWVSLATSLGISLLLALLFSIF--RPYHNAIYAPKVH---  
DQKHAPPPKGVFAWVPPVLSVKEENIADRIGLDAVFLRCANMMRNIFLVLSVIGCGILIAVNITQ  
SNG--TSTFTLMTPLYIIS-E-  
AVWAQVVCAYAFDIVIMFFLWQNYRHILALRRRYFDSPTYQMSLHARTLMTSVPNLRSEEG  
MRLTDGSSLPRTTIGRNVKDLPSLIKKHEEAVRELESVLAKYLKNPNINRPTMSVSGSKVDAIDY  
LTDRIQELEAKIKDVRQSV-DKRPMPYGFASWEAIEHAHAYTARRKKP-  
QGTIIKLAPRPSDIIWENLHLSQTRRWRVNVFVWVTLTLLWVAPNAMIAILSDLNNLGLVWP  
AFQTSLEAHNTWAAVQGIAPALTSIYLILPIFFRRLMRRAGDITKTAREQHVIIHLYFFFIFNNLI  
VFSLFAAWTYVAVINAKNNFWYKALSALCQVSPFWVTWLLQRNL-  
GATLDLVQLFTIVWQWFMKTSIEWTAPPPFDYASYNNYLFYATVAFCFATLQPIILPVAALYFAL  
DCYFKRYLLLYVFTKNESGGLFWRIVNRMLFGAFLSNVIALVAKSKGTWIMVYCLAPLPFIIL  
GFKWFCSRTYDDNMVYYNKGVMN--KR-AGDRLNSRFGHP  
>Penicillium\_marneffeii\_B6Q5Z5  
PAPTSLSGFISTLVPALVIAGAMVLAFIIL--RRKYRRDYMPRTFLPTD-  
YERTPSTGLWNWIIAMYKLPDITYVLQHSLDAYLMLRYMCLLVVMTFVGGCITWPILFPINATG  
GV--G-KQFDMLSMSNV---  
KARYFAHAFVGVWIFFGFVFFLVTRESIFYINLRQAYAFSPAYANRLSSRTVMFSSVPQDYLDEKK  
LRRMFGAERVKNVWIATDTSKLEEKVKDRDAAAMKLEGAETALIKQANKDRPTRLIGKVDTI  
DWARAEIERLNPEIEEQAKHRDAKVSASFVEFYNQNDAAQAYQSVAHNQ-  
LHMAPRIGVDPTQVIWSNLRIMWWERVLRFATIAFICVLIIFWAIWVAFVGSISNIDSLIARLPWL  
GFINHVFPFIRGVTGLLPSVLLAVLMALLPIIIRLCAKLGGAAPTAAVELWTQNAYFGFQVQVFLV  
TTLSSAASAVVEEIIQQPTQAASLLAAHLPQAANFYVSYIVLQGLTFTSGALLGIVGLILGKVLGK  
MYNWIGLAGLSWGTVLPPMSLLGVIAITYSIIAPLVMGFATVGLYLFYAFRYNLLYVANADIDTQ  
GRIYTRALQHLLVGVYIIVVCLIGLFAIAAGTGPLVLMIIFLVFAILYHVSNAALDPLLNYLPKNLE  
AEE-EYSAEVERDAYFHP  
>Penicillium\_marneffeii\_B6QP3  
VGSTSDSALLSTLLPALVIAGFWFGLFLIC--RRNQQRWYSPRSHLPNH-  
HERSPERGFLNWFGAFFQISDSHVLHSSLDGYLFLRFLRNLCIICFAGIILWPVLLPVHATGGA  
--G-SQMDQFSFSNV---

PTRYAHVVMGIIFYTYVFFVVTRESLFYANLRQTYLNSPAYVNRISRTVLFMSVPESYKSEKK  
LRQVFG-  
DSICRIWITSDCKELNKKVDQRDKLAYSLEKAEIKLIRANIKRPMHRVFGKKVDSVQYYRSRLA  
VAIKEVEELQQKHRDAKYLTAVFVEFKTQSDAQVALQTLSSHQP-  
MHMTPRAGIAPREVIWSALNLSWWQRIVRMFMVQGGIAALIIFWSIPAAIVGTISNVTYLANLIPF  
LGWLAHLPIEGIITGLLPSAAILLMSLVPPICRLCARKAGLPSLSRVELFTQSAHFCFQVVQVFL  
VTTITSAASAASVSIKNPLSAKDLLAQNLPKASNFYISYFLLQGLSMSSAAVVQIMSALMFKILSM  
LFKWTQLAGVSWGSILPVFTNMGVIALTYSCIAPLILGFAFIGLFLVYQAYRYNLLFVYDLIDITK  
GLIYPRALQHLLTGVLAEICMIGLFSIKAAIGPLIIMAFYITILAHISLNDMLRPLMNFLPRSLDT  
EE-EYLEKELADAYYEP  
>Perkinsus\_marinus\_C5KLG9  
PETVGGEAVLLSFALYIGIFAVLVILYSILRPR--LPRLYQPRRILRC-----  
TLFGSWIVGAIQITDEELFADAGLDAVAFIRMLRLGTKVALVGCCNAI-YLLPVYKYQG----  
TDALDQHSLGHLPNGSAAMVATLLASYVIFVWTLFLVYKEFSWYLKKRHEFLARH----  
NVANYTVFVRCIPEDLRSNEKLREYFDDHQVTDVRLVALDVDELEKEVQERDALIPNLEHAYNLL  
DQKGI--RQKT----  
NEFDTITMLEAQLLSLNRYISKTVDNAFTFRVRSAGFITFRSLQSTMMALQMLLNDKP-  
FKLCTEPTPLPDDVYWSNVGMPHLHQQLGLLLSLTATFALCIFWTIPVAFVASISNVSFLKQEFS  
FLEDAVDA-  
PAMDIIQQVSPIALSILNALLPVFLMLFSKWEGHISLATLNASLFGKLALFYIIQTTFFVSAIASSLM  
ASLKELTEKPT-  
FQTILATNLPQQANYFISFVFVQIGLDLGLLELIRVPAVTAFLRRWLKPLSFPMELEQPRLVSTVM  
LFFMILFVYSVMSPITSFVMAFAFTAFVYKIQYASVYDPSHDTGGQLWARAIRFIIACVIAEFT  
VMTVMAIKEGAVVSPMLPLPLFIGTILFWMYLEQRHFSASFLSVKTC---WEGAYNPIAMRHAEP  
>Perkinsus\_marinus\_C5KY51  
IQ-LGQSAVLLSGAIFLGTFFVAAVTIYSPLRGR--FLSLYQPRQILRC-----  
GAFMGWIPGIIKITDDELLENAGLDAIAFIRLLRLGTRVAVVGCLNAI-YLIPVYKYQG----  
QDELARWSVGHLATRSPSMVSTLIASYITFSITLFLIYTEFSWYTAKRHASMCRE----  
SVANYSVFRHIPPSLRSNHRLGFEFFEEGGVADVAVALDLGVLSKKVKKRNKLVKLEHNYNM  
WHHRGV--RPQK----  
EKIDVIEVLEVQLAALNDFIEKDISDAFSFRVLSDFVTFKSLQFTAMALQMQLYDEP-  
HALCIEAAPLPDGVYWSNVGMPHFHQQLGIVMSLAATTALCIFWTIPVTFVVSISKVSFLKEELH  
FLQSALEA-  
PPLGIVLQLLSPIALALLNELLPFILGFFSKWEGHVSVTALEVSLFGKLALLYIIQAFFVSAIAGSLL  
SGLRDLVENPT-  
LQNALSVYLPQQSYYFMSFVVFVQIGLGLGIELTRLVPALLALFRRCLNPLSSPVELNHPRVLSTI  
MLFFMILFVYSVMSPISSFVMAIAFSFFSLVYKNQFAVVYAPSCDSKGELWTRAIRFILACLISAE  
FTVMGVLAIKEAAVVAPLMLPLPLFIGTILFWCYLEERHFKVASSLPAKVF---  
YTGCEYEPVAMRQLQP  
>Phaeodactylum\_tricornutum\_B7G8J8  
EVVISWSGIWVTGLVSF---VQGLVFYSFFRYRRGKDALYEPRQT---RQHRSPPP--  
AGSWYKAAWNVSQEETLRCVGLDSYMLRFLRLGARICTMGCVLAL-VLIPTYATGE----  
TQQFNQLTLARVSADSKRLWASLIAWWIFVGFVLYELWNEWVLYAHNRYEFLARGVDMPKG  
RYAVRVEQIPPAYRTDQALLDYFERGSVEQATVFWKTDKLQALIDERQVTIEKLESAVAFTHGK  
PNKPRPKV----KVTDAIEHYKIEIDRLNEAIDMERSM--  
GKADTSTAFVTFSNLRTKQAAVQCELTGNP-  
DSMIIFPAPDPKGVWKNISVPLPQQKILQVQAAALWLAGILFWAAPVSFVTSIANLNSILESIG----  
-VDSAFWYGLVSGLLPVIALAILMAVLYMAIVAANKFVRYKSMAEVDAYALYWHQLFQFANLWLI-  
LIGGSVFNQIDALISDFSAIVDIIASALPGASVFFVNMMLVSSFGSFGMELSMMLPTYGIKLIMQMLD  
QGKEPPSLEWGQKVPPVFMFLVVVLYMPIVPLMEVFGLIYFAGSYLVMKHQCLHVYAQEFEG

GGDTWQKLFGLIACLYMGEVIFIAYMGIKEAPAQGVLFPLV-  
GTIIMQAVLKRNIQPLANLSLEVA---LDTTGETGKLYGMP  
>Phaeosphaeria\_nodorum\_Q0UJ62  
-----LGAKVPLGISAAIFLVFLLL--RPFNTIVYAPRLH---  
DEKHRPPPKSLFAWYRPVFKTNEDAYVHMIGLDATIFLRFARMCRNMFVVLISVGGIIIPVNVIK  
GVEFNVEAIMLMTPKSLFG-P-  
ILWAFVVVAYLFNIIVCGFLWWTYRAVHRLRRNYLEGSEYQNALHSRTLMITDIKRNFSDQGL  
VEITDSPEVPRATVGRNVKDIPDLIEEHEKAVIQLESVLAKYLKNPNATRPLCAPKKQKVDADYDYL  
TARIQRLEGQIKEARETV-DKRAMPYGFASYETIESAHTVAYAARNKHP-  
KGTTVRLAPKPKDVIWKNLLLDKTRRWRFFINHGWISSLTILYFIPNALIAILSKLPNLALVWEAF  
SVELNRHGFVAVVQGILAPALTSFYFYLPIIFRRLSMRAGDFTKTSRERHVTAQLYNFFVFNNL  
FVFSLSFAAFGMITLVVKYARDIFDTIMQTLNCVSPFWVTWLVQRNL-  
GAAIDLSQVANLAWGSFSRKLITRTAPPPFDYASYNYFLFYSTVALCFAPLQPVTLVVAFYFS  
IDSWMKYLLMYVFCCKNESGGLYWRILFNRMLVGVMLSNCCIALLCVARGKWTMLGAMVPLP  
LGLVAFKFYCKNTFDNSIKYYTIGDIK--SR-RRDRVAVRFGHP  
>Phaeosphaeria\_nodorum\_Q0UR74  
ESSNSLSSVISTLVPAALLALAFVTAFIVA--RKYFRRVYAPRTYLNHE-  
QRQTPAGGLFGWIKDFKNLPDTFILDHQSIDGYLFRYFKVLVAISLLGCITWPVLPVFNATGGA  
--G-  
EQLDILSMSNVAMNVNRYAHAGVSFIFLSLVMVIIARESFYVNLQAYRRSPWGASRLSARTI  
LFTNVPK-TLSQSTLFEMF--  
PGVKHAWVASNTKDLEKLVEDRDETALKLENGRGTATDGCKKKRPTHKLIGKKVDTIEYGRSH  
LAELLPKIQAEQDKHWQGELVGGVFLEFDTQRHAQDAWQMMQNKKN-  
SKLEAQLGVIPQEVVWQNLRIKPAEHLVRWTAATAFISVMIIFFAVPVAFVGLVSNINYLQQQFS  
WLRWIGSIPVILGVITGLLPTVMLAVLMALVPIFCRFLAKTAGYVTWSQVELKTQSWYFAFQVVQ  
VFLITTVASAATTVRSVINDPGSALTVLSENLPKASNFIYSYFILLGLSSAAGTLLNIGGFVVVLL  
GRIFELTKLSGSPWGSEFPKWTNLAVIAITYSGIAPLMLGFAVIGFSLIYVAFRYNFLYVYESNIET  
KGAAYQKAMKHILVGCYLSELCLIGLFAISTAVGPLIIMCILLITIIFSVTLSKALAHEEARLAY---  
TDPEPLPVEIQKRAFFNP  
>Phaeosphaeria\_nodorum\_Q0V4S6  
KGPSSLGAVAAAFVPTALTAVLFIIAFVLI--RQRFPNIYYPRTFGLTK-  
KDRTPCRSYWDWIHTMRVVPDKWMLYHQSLDSYLFRLRFLRTLIFICVVGACITWPILMPVFNATG  
GG--K-TELNRISIGNV---  
RKHLYAHATVAWVFFSVMFTVARERLWLIGLRQAWNLSKTNKRLLSSRTVLFLSAPTPALDQ  
ANMQRFFG-  
NDAVRVWPATKADKLKSLVSSRNSLVEELESaelTLIKNANSLRPTHRLVgkQVDSIDYYREKIK  
EKESIEIERARESNADSHGAAAVFVEFRTQAAAQHACQQVASADI-  
LSLTPRTGVKPNVIWENLTLAPARRLSQEGIALALVIATIIIFWSIPVSLVGAVSNIGYLAENFKWL  
AFLNKLPTAISLLSGLLPLLLSMLASYVPKIFRYIFKTFGEATNTSAELRVVKWYFVFQVLQVFL  
VTTLASGAAAVVSQIANNPTSIPQLLADKLPSASNTYLYFIIQGLSNAPSNVLNYSVLSWAFFD  
KKYNYVYMRGMQWGLKLPKYVNFVIAIAYACIAPLVLGFAALGLGLFYYSYRYQLLYTNQPKVD  
TKGHCYTLALQQILTGIYIAELCLFGLFSLRNATGPSIMIALLFVATVIFNYTTNRYFAPLEQYLPA  
DLALESPEYSEEDLNKAYLNP  
>Physcomitrella\_patens\_A9RIT4  
---TATSAFITSLLTSFGIFCGLVFAFSILSKWKVNHNIIYSSRIISG-----  
RNPFTWLYEAIFTSDAELVRVAGLDAAIYLNFFVCILEIFGYSSLFCIPVLIPIAAKSKSNADYDGF  
DNLAMGNVEEGTKKLWAFVVGTYWVSIMTYCVLVKHYKKMIHLRGKEQAHEK--  
PAPQQFSCLVRDIPPGMSRREQVNAFFRKDTYENCLIVCNLKKLTKMWTKYQAAKRNLEHAEA  
VHEESKVGIRPMHRLFGPKVDSINFYEEQVREIGRAVEAEQQRTEQ--  
LPAAFVFFNRRRAAAEAQAVHAPYA-  
MQWQVYPAPEPREVVWKNLHKSVERLIRQGLVYFAVFMVTLFYMIPIALISSFTTLDNLVKFLP

FLKVIVEYPPINTVLQAFLPQIALIIFLSLLPSLLMALSRMEGIPSQSHVVRGASGKYFYFIVFNVFL  
GVTLFGTVFSSLAGFQFSVSSVVSFLGSKLPPVAAYFITFVALQFFVGYGLELSRVVPLAVYHLK  
KTLEEAWEPGPFYHNLVNDILILMISMAYAVIAPMILLFALLYFAIGYVVLNRNQALKVYVPAFES  
GGRMWPPIHSRIVAALFIGQVTMMGYMGIKKFPYA-  
VLVILPLFTIFFASMCKMNYYPSPFNVISLAIASE-----KIIEAYTPE  
>Physcomitrella\_patens\_A9RU79

--  
AKSELDLLTSFWINVVLTVSFLISYVLLKNLPLNFRVYYPVRYLKLGLVERVDDLSNLFDWILSTW  
RTTEMEFIEQYGLDSAVLLRXYLFLGKLFVPLMIWGSVVLIPVNTTDTLQNYSRVDTLSIANVH  
DLSERLWAHLLASYLFTIWTIILLYIEYSRISKRRQLQYIVSRK--QRPEHFTVLVRHVPKM-  
SVGEKIREFFQEEHYHTHQVFNARKLHLKLIKVEKEYEGELEAYEARADPEASRPTLKKCMP  
KSDAIDFYKDKIAQLKKEVRSERKNVLSDYVVKAGFVTFNSCWGAAVCAQSLQSGEC-  
TKWMTWACEPRDVYWRSLPLNYMQLNAYRLIVNLLVVALIIFFFIPVAFVQSLANLDTLIKYPF  
LKPIIRWSIVRSFFQGYLPGLLRIVLILPPLLRVLTKEFGHVSYSKIDKYAALKYIFMVVNVFFG  
NVFIGSLFEQLRQYIAAPTTIPKTFGFSVPMKATFFMSYIMVDGWSANAAEILRLWPLFWYHVS  
FRVKILPASPPDYTVILTRLSLYFLLGLVYAVISPLILPFLVMFFAFGYLVYRNQIINVYEPYEC  
SFWPFIHRNIIIALIHKLTIIGLFSLKQAVASTPFLPLPVLTVFHLHCRQKFLPAFKNFPLQEAI  
NADTVNMLEKSYLHP  
>Physcomitrella\_patens\_A9RYA3

--AGNTLDVVTSAWINVVTIVILLAFVKNQPMNARVYFPKWFL--  
HKRSAGAHVMDWIWTTLRMPPEMELIEHAGLDSAVLLRVFLLGLKMFAPMLVWGCFLIPINKTD  
NELMSYSTVDMMSIANVHDKSKRLWAHLLAAYMYTAWTCLMLFKEYEQVESLRFKFLAAQK--  
RRPDQFTILVRQVPRI-  
KVSQKIENFFKEEHYITHQVVDANYLSLLVEDKEKCLDTIEYLQKQGGSSQSCPTTRKVG  
KVNSIDFYTSKYNRLIEEIKTVQCHILEKFMKAGFVSFNSRWGAAVCAQTQQSKDS-  
TCWLTDWAPEARVDCWDNLSIPYMALNSRLLVGFLIFFIAFFMIPITFVQSLANLDAKDKNFH  
FLKPLIDQSFIRSVLQGFPLGSLNLSLHFLPQLMMFLSKFEGRVSYSKIMRSAATKYFIVMVVNV  
FFGNVIVGSVFLQKQYINSPIRVKAFGSSIPMKSTFFITYIMVDGWSTVAAEALRLGAFMWYH  
LQNMRRNAMAFSTLQYNAVLPKLGFLYFLLGLVYSVISPLILPFIIVFYAFGYIIRNQNINVVY  
ESSAAFVPLAHRFIIVALLITHITLIGLFSIKRSAASTPLLLPLPVLTLFFHWYCTDRYGP  
QEARAKNLDVRSFLERAYLHP

>Physcomitrella\_patens\_A9S3X9  
---TATAAFVTSLVISFVIFVFLFLLFLILSRRPGNFHVYHPLRALRG-----  
YGPFWAIDAFRVTDEQLVAAAGLDAVVYVNLFTTALITVLSAVFCIIVLIPICATENNNFEYS  
GNLSMSNIPSGSPKIWAFLIGVYVWSIVTYYSWVWYKVFSLRNMMSHSEV--  
SRPQQYTVLVRDIPVHEKRTEQVESFFRRHSYERCMIMHDFSEAESLYNEREVASRKLEHAE  
VFELSKGGVRPMHKTLPKVDSEFWTKKIHELTPQLEEARKKCKAN--  
EDAALVFFNERLAAAQAAQSVHAAYA-  
LEWQVEPAAEPRECIWRNMHLSAWQRSIRKPVVYVVTFFVIFVMIPIAAISAITTLENLET  
KSIKTRIKALNAILQAYLPQLALIVFLALLPKLLTSLKAEGIPSKSHISRAASGKYFYFMIF  
VFLGVTIFGAVFSSFKGFKLSVSKVVELFGTKLPPVSTYFITYVALKFFVGYGLEISRIIPL  
IYHIKRLKLEDAWAPGSFSYHTSVPSDLLVTLTSLYSVIAPMILVFAFLYFAIGWLVMRNS  
ALNVYVPEWESNGRMWPHIHNRIALLVLSQITALGFFAVKKFPYT-  
VFLIFLPLATFAFYLYCKRNFYKSAVVSLEYVASQ-----TIVQAYTPT

>Physcomitrella\_patens\_A9S768  
---ATQTSFLTSLVTSFVFCVLMVYFILSRRPGNAPVYVYPLRILRG-----  
GPFWSWITESYRATDAEIVAAAGLDAVYIHLFTAAVEIIGLSALYCIPVLVPLSSTSSYNQ  
QYQNFNLGGMANVEPNRSKIWAFLIGMFYVSMVYFVLWRSYRWVVDLRDREIASSN--  
ARPQQFTALVRDIPKKEKTRAQQVESFFARGAYNRVQPVYNIKPVEKLFSEREDALRKLEH  
SEAVWELSKQGERPMHRIWGRKVDSDYWRQKSEEMKPKLDAEQSRTL--  
QDAAFVIFNDRRTAAEASQVHAPHA-

LFWKVSQAPEPEEVVWNNLHIHAWN RAMRRIIVSVITFFLVIFYMPIAFVAGLTTLENLEKLLPFT  
SNITKIPVVGAIVQGYLPQLALLLFLFLLPKIMMVL SHAEGFPSQSQVVR SASSKYFYFIIFNVFLG  
VTIFGAVFSNLSSVKLSANKVVTLLGSKLPPVASYIITYVALRFFIGYGLELSRLIPLCIFHFKRKLG  
EAWAPGAFTYHKSIPNDLLILTISLCYSVIAPMVIPFAFTYYVLGWVQNRNQLNVHVPDFESHG  
SMWPHIHNRILAALFVAQITALGYFGVKEFLFT-  
PILILPVATVIFYMFCKKNYPSIVVVSLWTAAE-----AIAYEYTPS  
>Physcomitrella\_patens\_A9SDM0  
----EISDLATSAGINIGLATLFLLLYSVFRKNPRNAGVYSTRQMLRE--KRKE--  
LPSPGWLVRAWN PSEDEILETAGLDAVVFLRIFKFCIRFFICTLVGCGILAPLNFNNDTYIADNGT  
LEKLTILNISQGS PRLWFHLAVLYFISFTAYILLYSEYREISMMRQAYLMEAS--  
PQPQDQFSVLVRGIPKEKSYSERVEKFFIELHYLSHQMIFHSNELESLLKKFDYEKNKLANLKS  
LDE----RKPCRTRFGPTKDRIEYHTQKLEELFGQIREQQINIYKE-  
ELPAAFVSFRTRWEAVVAAQTQQSVNP-  
MYWVTEWAPEPRDWDVNSLKIGHGQLFIRRFISVAVATLIL-  
FTSPVGVIIQLLDSIDRLTKYLP IAKILFEIPGVKQVVQGYLPSLLTVAVLYGLPLVMMCLAKIAGYV  
SISRQERKTAGMVFNLLWINV FVSILGTSIFQILD TYSSDPRSIPRRLAEVIPGKAYFFMTYIMTT  
GWAGFPLEILQSSVLILNYVKRILSDVW---  
SLPYRYRCV PNVLLFVFLGLTYSIITPLLLPFLLYVFLGYIVFRNQILHVYEPAYETGGQFWPHVH  
VRIIFLVLFLQICFIGVFTVKGLGNGSFFV VPLPIFTLMFNEYCRQRFFPAFRHFNMESTVKKREDL  
LEHIRVAYLHP  
>Physcomitrella\_patens\_A9SH39  
----EIIYLATSAGINLGLAILFFTLYSVFRKQHANAGVYFTRHLLRE--  
RQRMKLVPSATWVKRALDPSEEDILKSSGVD AVVFLRVFIFCMRFFMICTIVAFGALAPLN YTD  
YLADYGTLEKLTILNISY GSMRLWVHFAVLYIISFSAYALLYIEFKHISKLRLEYLDTVL--  
PQPQDQFTVLVQSIPQELS YSDNVDDFFRRIEYLSHHMVYKSGHVTSL LNELEKLLKIFELKQKP  
PTE----RKPRRAYGPLVDPVELHMQKLEDVHHQIRQCQME-FKK-  
KIPNAFVTVRSRWGATVTAQTQQSTNP-  
MHWVTQWAPEPRDIDWPNMEIPYDQLFYRRIVSTVLALALTAIYYPIVAAIQLLDNLDNVKKYLPI  
VANVLEIPAISL VQGYLPALLLALLLYMVPSIFFFLSRIEGHPSVSHQERKASSKMF SLLAGNIFL  
ASVLSGSLLTISEFTEDPKGIPRRLAEAIPTRASFFITYIMTTGWAGMPLEILQSGVLV LNFVKRN  
LDQVL---  
SLPYRYRTLPLV LFFVLLGLVYSIVSPLILPFLLIYFTLGYIVYRNQVLNVYEPAYETGGQYWPEIHS  
RTIGCIVFMQIVFIGMFSLKGLKSASIACIPLPFLTWLFHEHCRQRFLPIFKNFNLESTMKKKDEIL  
NSIRDAYMHP  
>Physcomitrella\_patens\_A9SJW4  
---TATGAFITSLLT SFAVFCGLLAFAVLSKLVNYNIYYPSRMISG-----  
QNPLEWMKEAIMTSEEELVRIAGLDATIYLNFFVAVLEIFAYSSLFCIPVLIPIAAKSHHNEEYAGF  
DNLAMGNVEEGTTKLWAFVLVGT YWVSFVTTYV LAKHYKKMIHLRGKEQAYEK--  
AAPQQFTCLVRDIPPGMTRLEQVNSFFKKD TYETCMVVTNIKRLLKIWLKYEAAKKNLEHAEAV  
CEEPKSVTRPKHKLIGPEVDSINFYREKVRELGR LVEVEQQRTLEQ--  
LGAAFIFNNRRAAAEASQAVHAPYA-  
MQWQVFPAPEPREVVWQNLAI PVYQRMVRQGVVYCMVMTVLFYMPIALISSFTSLENLIRVL  
PFLKVVVNYPPINTVLQAYLPQLALLVFMNLLPSLLMLLSRLEGIPSQSHLVRAASGKYFYFIVFN  
VFLGVTLFGTVFSSIAGFKFSVSSVVT LFGSRLPPVAAYFITYVALQNFIGYGLELSRVVPLAIYHL  
KRRLDAAWAPPAFTYHTLVPTDILILMISMAYAVIAPLILVFALLYFAIGYVVLNRNQLKVVYVPAFE  
SGGRMWP HIHTRIVVALFVGQITMIGYFGIKKFPYA-  
VLVILLPLIT IIFATMCRINYYPSFRVTS LAIAVE-----KIIEVYTPS  
>Physcomitrella\_patens\_A9SK54  
---TATSAFVTSLLT SFGIFCGLVFAFSILSKWKVNHNIYY SARITAG-----  
RNPFAWLREAIFTSDEELIRIAGLDSAIYLNFFVCILEIFGYSALFCIPVLVPIAARSRNNEAYEGFD  
NLAMGNVEEGTAKLWAFVLVGT YWVSFVTYFVLVKHYKKMIRLRGKEQAREK--

AAPQQFSLIRDIPPGMTRREQVNAFFRKDTYMNCLIVCKLNKLLRIWKKHQAARKRNLEHAEAV  
YEESKTGTRPMHRLCGPKVDSINFYEEQVREMASMVAVEQQRTLEQ--  
LPAAFVFFSSRRAAAEASQAVHAPYA-  
MQWRVFPAPEPREVVWNNLHHPVYERMIRSGLVYFAVFMVVFYMIPIALISSFTTLDNLVKILP  
FLEVVVNFGPINTVLQAFLPQIALIIFLSLLPSLLMAFSRMEGIPSSQSHVVRAASGKYFYFVIFNVF  
LGVTLFGTVFSSLAGFQFSVSSVTLFGSKLPPVAAYFITFVALQFFVGYGLELSRVVPLSVYHL  
KRKLEEAWEPPGFYQTLVPNDILILMISMAYAVIAPMILLFAIVYFAIGYVVLNRNQALKVYVPEFE  
SGGRMWPPIHTRIVVALFIGQITMMGYMGIKKFPYA-  
VLVILPLFTIFFASMCKMNYPSFNVM SLAIASE-----EIIAAYTPE  
>Physcomitrella\_patens\_A9SW37  
---ATQSSFITSLVTSLIVFLVLWLVAIILSRRPGNAVIYYPLRVLRG-----  
GGFAFWVREAFKAKEDDIVATAGLDAVYMHFLTAAFQIILISAIFCLPILLSLAGTSNYNQQYTNI  
DNLGMGNI EPQSSKIWAFMLGMFWVSLATYYVLWKS YRRVVYMRDRANANAA--  
ARPQQYTVLVRDIPKKESTRDQIVNFFARGVFSRVQPVHDIKPAGKIFSDREDALRKLEHAEGV  
WEISKQGQRPMHKT LGPKVDSIDYWRAKSQEMNPQLEAEQRHTLMQ--  
QAAAFVIFSDRRSAAEASQVVHAPHA-  
LRWRVVSQAPEPEEVVWKNLHIPAWQRAIRRGVAVLTFLLVFYMIPIISFVASLTTLENLEELLPF  
IRSITRISVLGNIIQAYLPQLALILFLALLPHILILLSRLEGFPAQSQIVRSASAKYFYFVIFNVFLGVTI  
FGAVFSNLSSFQLSVSRVVQLLGSKLPPVASYFITYVALRFFVGYGLELSRIIPFIIFHLKRKVREA  
WAPGAFKYHKSVASDMLILTITLCYAVIAPLILIFAAAYFGLGWLMRNQALNVHVPDFESHGSF  
WPHIHNRVLAALFVAQITAIGYFGIKEFPFS-PFLIVLPILT VVFYMFCKKNYPSIKVVS LYVAAD--  
----SIAHTYTPV  
>Physcomitrella\_patens\_A9TEC4  
---TATSFAVTSLLTSLIIFVLLLLFLVLSRRPGNFHVYYP LRALRG-----  
RGLFAWAKEAFQATDEDIVAAAGLDAVVIHLFTTALEIIVLSA AFCIPILIP IAATSDNNKFYSDFD  
NLGMGNIQASSPRLWAFLLGVYVVSFVTTYSLWKAYKRVFNLRNNLHSSAV--  
ARPQQYAVLVRDIPAHQTRSEQVESFFRRHTYERCMVLHDFSQA EKLYDEREAASRKLQHAQ  
AVFELSKTGVRPMHKT VGPVKVDSIDYWTTKINELTPKLEEERSRVDAK--  
KDAALVIFNDRLAAAEAAQSVHAPYA-  
LEWQVEPAPEPRECIWNNMYVPAWQRSIRKPTVYVITFLTIVFYMIPIAISAITTLENLEKILPFIKS  
ITRISALNTVLQAFLPQLALIIIFMALLPKLLLALSKTEGIPTKSHIERAAAGKYYYFMVFNVFLGITIF  
GAVFSSSAGFKISVSKVVELLGSKLPPVATYYITFVALKFFVGYGLEISRIVPLIIFHIKRKLEEAWA  
PGPFSYHTSVPADLLIVTLCYSVIAPMILVFSFLYFFIGWL VTRNSALKVQVPEWESNGRMWP  
HIHNRFLGSLLSQITALGYFAVQQFPYT-VFLIFLPILTFGFYVYCKRNFYPSFAVVS LYVASQ---  
---TIVEAYTPT  
>Physcomitrella\_patens\_A9RK07  
---TTLREIGVAALVNIGLTILFLLSFVFLSLQPVNDRVYYPKLYIKG--  
LRKGRPTRLFDWVKSALRKTENDIIQHAGLDSAVYLRIFLVGLKIFIPLMILSMAILVPVNVGAGSL  
AEFSSIDKLSMSNPNRSPRLWAHLVMSYVFTAWVCFILFMEYKSIAALRLKFLSDET--  
RRPDQYTMVVLQIPDL-  
PLGKQVETFFRTDYLLTHEMAYNANKLTKIARERDKAQNWLDYFQLKYKRKPAM-  
RPMTKTFGEQVDAIDHYSALVERLTTEAEIEREFVIPKAIMPAAFVSFRTRWGAAVCAQTQQVQ  
DP-  
TLWLTCWAPEPRDVYWPNLAIPIYVQLGFRRLAITVIVFLT VFFYMIPIAAVQSLANLEGLRRSIPA  
LDGFLQMEFISSFVQGFPLPGLILKLCFLLLPMFIMFLSKFEGHLSISKLERRAAAKYYYFVVVNIFF  
GSILTGSFAFQQLKTFVSS-  
SGFLNTIALSIPQKASFFITYIMVDGWSGPAGEILRLTPLVKYHVKNTRLEAASPGTLTLDLTPQ  
LQLYFLMGLVYSVITPVIIPFIVVFMGFGFVVYRHQIINVYDSAYESAGSFWPHVHGRIIAALIIEHV  
TLISLFLVKDSCSSTPFMIALPVLTLVFNNYCKKRFEPAFKNYPVETAVEKDLNLAVFFRNAYNH  
P  
>Physcomitrella\_patens\_A9SW54



-  
SESGSLDLLSSFWINSVLSVAFLICYALFKNQPLNSRVYFPRWYVFGEDERIDEFLNGFNWIWF  
SLRKTEEELIELVGLDSTVFRIFLFLGLKVFVPMLLWGCAVLIPVNKTDGYLKVYGAPESLSIANV  
EDSAKRLWAHLVASYLFTGWTCLMLYIEYATVERMRYDFLASKK--QRPDQFTVLVRQVPRQ-  
SVGMRIQEFFQQEHYVTHQVVYKAKELTKLIKEKEYEGKLERWYDQLSREPSTPRPTIKPTTK  
REDAIDYYEREIERLEDEIKKERKKVLQKYVMRAGFVSFDCRWAAVCAQTQQSRDR-  
TKWITEWAPEPRDVYWNLAIRYMLLNSRRLVVTALVVVLVIFFLIPVGAVQVLNLEQLIKYMP  
FLEPLSRWKYVESFISGFLPGAILKIFLLIIPYVLRELTKFEGHVSKSKIEKYTGVKYFVFLVVNVFF  
GNVLIGSLFDQLRQYIAAPTSIPRAFGVSIPKKATFFMTFIMIDGWTSIAAEVLRLWPLIWIYHITSV  
RVKVIPATPPAYFIVLPRLSLYILLGLVYAVISPLILPFLCVFFAFGFLIYRNQVINVYEPEYESAASF  
WPSFHRNVIVALILKHVTLIGLFSVKRAFASTPFLPLPIVTYLHFHLCSEKFYHAFVNYPLQEARL  
KGV DVKSFLETAYLHP

>Physcomitrella\_patens\_A9TU69

---TTLQDIGVSALVNI GLTILFLLSFVFLSIQPVN DIVYYPKLYIRG--  
IRKERPMRLLDWAKSALRKTEDDIIQHSGLDSAVYLRIFLVGLKIFVPLMILGMAILIPVNVGAGSL  
PEFSSIDKLSMSNPNGSSRLWAHLVMSYVFTAWVCYILFMEYKAIAALRLRFLCDEQ--  
RRPDQFTVMVLQIPNQ-  
PLDQQVEQYFRRDNYLTHQ MAYNANQLSKIVKERDKAQNWL VYFQIKYQRNPAM-  
RPVTKTFGDQVDAIDYYTSEIERLTKEAQAEREVVIPNATMPAAFVSFKNRWGAVVCAQTQQN  
QDP-  
TLWLTESAPEPRDVYWSNLSIPYVQLGFRKLAVGGIVFLLVFFYMPIAAVQSLANLEGLRRSIPA  
LDGFLQKSFVSSFVQGFLPGLALKLFFKFLPKFIKITKLEGLAVSKIERRAAKYYIFVVVNIFFG  
SIFTGTAFQQLKTFVSS-  
SDFLNTLASSIPQKASFFITYIMVDGWSGPAGEILRLKPLVKYHIRNMRLEAADPGTSLDES LP  
QLQLYFLMGLVYSVITPIIIIPFIVVMGFGLVYRNQVINVYDPEYESAGAFWTHVHGRIIAALIEH  
LTLIGLFLVNESFSSTPFMVALPILTLVFHNYCKKRFEAAFTHYPLENAMEKNLDTIFLRNAYNH  
P

>Physcomitrella\_patens\_XP\_001768825.1

-A--SLYDIGVSAVINCTIMSLLFIFFLVFNIQPLNDRVYHPKLYMKDQ-  
RKGSPSLQSF AWIVEAFRMSEHQIIDHAGLDAIFLRNIQVGLKIFIPMTVGLSTIVTINVG GYL  
KSFTDIDKLSIANVPSGSSR-----  
-----  
-----

FLKTLAYTIPMKATFFITFIMVDGWAGAASEILRPWGLLSYHIQNAKVRAMDPGPIIYYVNL AQLQ  
LYFLMGLVYSVITPIILPFVVVTFAINVYVYRHQ-----  
-----HASKKNFNMSEFIQNSYKHP

>Picea\_sitchensis\_B8LKM0

----IVSALLTSVGINTGLCVLLLSFYSVLRKQPDNVYVYAPRRVAE-E-QAK---  
VPSPGWIVRAWRLSEDEFLSAAGFDAFVFLRIFIFSIRIFSIAGIIGVFVLLPLNYTGNQLRTNQSL  
DLFTIANVQDGSKRLWVHFCAYVLISGAACCLLYLEYKGIAEKRF SYFNSSP--  
PQPNHFTILVRGIPKH-  
SMSETVEEFFTLSTYF SHQM VYHSNRVQSLMHEAEKLYKRILHLKTKPRLQ----  
RKSHREFGAKVDPVDLYTKKLEDVEENVKLEQSTFYEK-  
ELPAAFVVSFRSRYGAAMASQLVQSSNP-  
LLWVTEPAPEPSDIYWPFLSAPYIQLWISKFVVVVAVFFLTILFLVPVTFVQGLTQLTELESFLPFL  
KKVLKLTIVSDIITGYLPSLILQMFQYFVPPIMLLFSAMRGHISNSGKMK SACIMVLSFTIWNVFFA  
TVLSGSVISQINTFLSDPKDIPRQLAVVVPGQATFFITYVLTSGWTGLSLEIARIFPLIGNFFIRHAD  
CAP---  
SFPYHRDIPKVLLFGLLGFTYSLLAPLIMPFLVYFFVGYIFYRNQMLKVYSPRFESAGQFWPIVH  
NCTIFSLVFMQIIAIGIFGVKKVPFASGWVIPMTVITLLFNDYCRKRFLPIFNRYPAEILIKRMASFL  
DSL VNAYRDP

>Pichia\_stipitis\_A3LQ78

STATSTSAVLSTLVANLILFGIFILGFLIL--RLKYKRIYSPKSSFELE-  
DQRPEPRDPFRWIFILLTKPNSFIIQQAGIDGYFFLRYVFSFACVFLVGML-TWTVLLPINATNGK-  
-G-TGLDQLAISNV---  
RNRYYAHVFIGWVVFYGGVIFVIYRELFYNSLSRAVLASPKYSKKLSSRTVLFQTVPDSLLDEKQ  
LYKMF--  
NGVKRIFVARTARDLESKVAKRDALVKQLENAQNKLATAVNRKRPRHKSFSKIDTINYCKEEIP  
KIDKEVRAMQKKFRNTNRPKNSIFVEFEDQYHAQLAYQATVHHNP-  
LRMKPVTGVEPGDVQWSNLRMFWWERITRRFLAFAAVVALIILWAVPVAFVGVISNITYLTNKL  
PWLRLWILNMPFLLGIITGLLPAILMALLMMILPMFIRGMAKIAGAPTYQAIELYTQNVYFAFLMING  
FLVTALASSATSTVTQIIIEPTSAMSILANNLPKSSNFYISYIILQGLSVASGSLFQIVGLILFYLLGR  
KWNFSGLGSTAWGTTFPVFTNITCIALIYSIISPMIMLFACVALFLIYIAFCHNLTYVLKEGPDTRG  
LHYPRALFQFTFTGIYIGQVCLLGIFAVGKGGWGPVILQIIGIFATVFIHINLINESFDHLLQVVPIDCMR  
ALTE----DDKHAYDMP

>Pichia\_stipitis\_A3LQH6

AIRGPQRVFAQQLLFCSSLGLISFCLFCVLRYPH--IYAVRTR-----  
RNYFGWISVIYKLTDEDILNFSGLDAYVYLEFFRMGIKVFLLAIVALCILSPVRYFTGNVD-  
DNITWG-KPS-DDFPKYLWVYPVFTYLFSSIIYVYVLFEFQKVLKTRQKYLASQ---  
NSITDRTIRLDGIPKKILKKNLDRFIEDGKVIDVKLMDWTPMEHLFKQRRKIINRLESK-----  
SVMPLDK-----DSEINDLSRSLININSKIRNIQDR--EFKQLPSAFITMESVASAQMAAQITLDPV-  
YKMIYNLAPAPKDIRWENLKMSYTKRMIKSYLITIIIILSYAVIIFLVALLSLLDLKSIKFWPSLGGF  
IGKSFLTTFVTGILPPLLFSALSVPYFYKFLCMHQGYSSNSEIELSTLSKNFFFNFILFLAFMT  
TGTIWDYLSYISDT-  
TKIAKTLASALRKYSLFYVDLILLQGLAMFPVKLLQISDFLLFLLRNMYRSYTPQVDFDGIHLPQ  
HIFIFMIILYSVVSTKIVTSGLVYFVLGWVYRYQLVYNFVHPPHSTGKVWPMIFRRVMLGLIIFQ  
LFMCGTLVLEKAILLSLLCSPLPVTVVIFWNFEKYYVPLNTFIALRAINPYTIDEEREQYTDYTP

>Pichia\_stipitis\_A3LTU0

SSDSSVSQFLAALIPTAVIAAVFILLFAI--RKKQKRVIYEPRSIIETK-  
DLQTESTGLFSWAPHVLKKSSESYLIQQAGIDGYFFIRFLLEFGLICILGCFITWPILFPVNATNSN--  
G-KGFNAISYSNV---  
KWRFLAHIFVSWIFFGVSFLIYREIVYYTFRHAVQTTPLYDSLLSSRTLLLTEIPESLYEEETLR  
SYF--  
PPAKTIWYARDYKLEKDKERTKLAGKYEGAANKVIAKAVKKRPTHRLIGKKVDLNYGVERLG  
ELNTSIKEQQENFKENKQVPSVFIEFPTQLDLQLAYQAVPFNKD-  
LKGVRRSGLAPSDIWIENLPLTKKSRWAKKVANTVLTLMIIIFWAIPVAVVGAININFLTDKVHF  
LRFIDNMPKLMGIITGLLPVVALAILMSLVPPIKMGKVAGCITIQEVNGFCQAWFFAFQVVHSF  
LVVTVTSAAASSVTSIISKPGTALQLLSSNLPKASNFYLAFFCLQGLTIPSGLLLQIVPLILSQVFSR  
KWNWYKIGSPDWSTTYPAYQLLAVIGLCYAIAPLVLGFAGIAFLVIYLAYIYTLVYVLQNPVDAR  
GRNYPRGLLQFLVGLYLAEVCLTAMFVFGKNWVSVALEALTIPVTAVHLYLKWYLPWETVP  
ISAIRYAIENDEFVKTAYADP

>Pongo\_abelii\_Q5R826

LQGVTFGGIPTVLLIDVSCFLFLILVFSIIRRRFWDYG----  
RILEADSSTSSSGQLGCCPWLTAFRLHDDQILEWCGEDAIHYLSFQRHIFLLVVVSFLSLCVILP  
VNLSGDLL--PYSFGRRTIANLQTDNDLLWLHTIFAVIYLFLLTVGFMRHHTQSIKY-----  
KEENLVRRTLFLITGLPRDARK-  
ETVESHFRDCEVVDVQLCYNVAKLIYLCKERKKTEKSLTYTTLQVKTGQNPCKPCG-Q--  
EWEDAISYYTRMKDRLLERITEEERHV-  
QDQPLGMFAVTFQEKS MATYILKDFNASSELYKWTVTFAADPEDICWKNLSIQGLRWWLQWL  
GINFTLFLGLFFLTPSIIISTMDKFNVT-----  
KLNNPIISQFFPTLLLWSFSALLPSIVYYSTLLESHWTKSGENQIMMTKVYIFLIFMVLILPSLGLTS  
LDFFRWLEA---

SIRLECVFLPDQGAFFVNYVIASAFIGNGMELLRLPGLILYTFRMIRNVQNQAFQYEFGAMYAW  
MLCVFTVIMAYSITCPIIAPFGLIYILLKHMVDRHNLYFIYLPA-  
KLEKGIHFAAVNQALAAPILCLFWLYFFSFLRLGMKAPATLFTFLVLLTILVCLAHTCFGYFKHL  
SPNYK-----QQQQQTY---

>Populus\_trichocarpa\_B9GJG0

----DFSSFLTSLGTSFLIFVVLMLLFTWLSRKPGNSFVYYPNRILKG-----  
RNPFAWIREAFSSSEQDVINMSGVDTAVYFVFLSTALAILVLSGLVLLPVLLPVAATDDNVKTFS  
DIDKLLMGNVKGGSPLRWAFIATYWVSLVTYFLLWKAYVHVSGLRANALMSPE--  
LTPEQFAVLVRDIPPGRTRKEQVDSYFKSETFYRSMVVTNNKEVNKIYIELEGYKKKLAHAEAVY  
DESKKGLRPTIRTVGRKVDSEIHYNEKIKELIPKLEAEQKVTLNQ--  
QACAFAFFTNRVTAASAAQSLHAQMV-  
DTWTVMEAPEPRQIWSNLKIKYFQRIIRQYVVCFIVALTILFYMPIGLISALTTLDNLKKILPFLKPI  
VNIVAVKTVLEAYLPQIALIVFLALLPKLLLALSKAEGIPSVGHAVRATSGKYFYFTILNVFIGVTLG  
GTLFTTFKSIEEKPNISVLLASSLPGNATFFLTFVALKFFVGYGLELSRIVPLIIFHLKKKLEAWF  
PGDLGYATRIPGDMLVLTIVLCYSVIAPLIIPFGVYFGLGWLVLRNQALKVYAPSFETYGRMWP  
HIHTRVIAALILFQVTMFGYFVVKKFSFSTFLLIPLPILLSLLFAYVCHKKFYRSFSDTALEVA-CR----  
--RIYRSFIPP

>Populus\_trichocarpa\_B9GNK6

----DIGALLTSAINTGLSVLLFSLYSILRKQPSNTIVYFGRRLAS-L-NNR---  
VPSPSWIVKAWETTENEILAIGGLDAVVFQRILVFSIRVFSIAAVTCLFLVLPVNYGQEM--  
AESLNVTIANVKEGSRWLWAHCLALYIISCSACVLLYFEYKSITKMRLAHITTSP--  
PNPSHFTILVRSIPE-SYSNSVKKFFTNSSYLSHQIVYRCGLVQKLMVDAEKICMRIKAAPKG----  
-----QSSLCGGS-TSKVLTDEPESVKDSFSYSNLNLADN-  
ERSAAFVIFKTRYAAVVATQMLQSPNP-  
MSWVTELAPEPHDVLWSNLCIPFRQLWLRKIATLLASIVFMVFLAPVTFVQGLTQLEKLSQTFP  
FLRGFLKQDLINHVLTGYLPSVILILFLYTVPTMMLFSSVEGVPVSHSGRKRSAACKILYFTIWNV  
FFVNHVSGGFLFAFNMLS-  
SVGDIPVELAKAIPNQASFFVTVYVLTSGWASLSCEVMQPFSLCFLKHKHSDGLV---  
SFPYHTEVPRVLLFGLIGFTYSVMAPLILPFLLIYFLLAYLVYRNQIVNVYITKYEGGGQLWPIVHN  
TTIFSLVLTQMISLGVFGIKKSPVASGFTIPLIICTLLFNEYCRQRFFPIFKKNVAQVLEMMEEIHQ  
QLHSAYCQL

>Populus\_trichocarpa\_B9GTV5

---ATLSDIGVAAAAILTAFAPFAFFAFAILRIQPVNDRVYFPKWYIKG--  
LRSSPFVRFNLWMPAALHMPEPELIDHAGLDSAVYLRIYLIGLKIFVPIAFLAFTILVPVNWTNSTL  
E-YSDLKLSISNIPTGSRNRFWTHLMAYASTFWTCYVLKKEYEIVAKMRLHFLASEK--  
RRPDQFTVLVRNVPPE-  
SVSELVEHFFLVNDYLTQVYVYANQLSHLVNEKKMKMKNWLDYYQIKYSRNKSR-  
MPSLKTFGTRVDAIDHYTSEIERLSR----  
KRDEIVAKAIMPAAFVFSKTRWGAAVCAQTQQSRNP-  
AMWLTEWAPEPRDVYWDNLAIPFVSLALRRLVIAVTFFFLTFFFMVPIAFVQSLANIEGIEKALPF  
LKPIIEMKVIKSFIIQGFPLGIALKIFLIFLPSILMLMSKFEFISISGLERRSAARYYIFQFINVFLGSIIT  
GTAFQQLDNFIQSATEIPKTIGVSIIPMKATFFITYIMVDGWAGVAGEILRLKPLIYHLKMFMEEM  
DPGTLGFNTGEPQIQLYFLLGLVYAVVSPILLPFIIFFALAFVYRHQIINVYNQEYESAAAFWPD  
VHGRIIVAVIVSQQLLMGLLSTKEAAQSTPLIITLPVLTIVFHLFCKGRYEPAFVRYPLQEAMMKN  
LNLKSFLQNAIHP

>Populus\_trichocarpa\_B9GWL7

----NPESLTASAAINFGAFIVLSLFSIFKKQPSNASIYYARRLSK-R-HH---  
DLPSVAWIPRAFRVTEDEVLDIGGLDALIIRLFKFGIYFFGICSLIGLVLLPINFGDQ----  
YHSMDPFTISNISAGSNRLWVHFTCLWLISFYGLYLLYKEYDGISVKRIQLLRNLR--  
HQPDRFNVLVRQVPFHNAYGCSVDHFFSKNSYCSYQMIYDGKDIEDLLHQAKYVARKIEDMRG  
KLTVK----KRDKESSQEDDVKIALFEEKQQENVRKIRQLQNESMGK-

ELPVAFVTFKSRRGAALVSQTQQHSH-  
LIWITEMAPEPRDVSWSRLEIPFKILPLCKIGVVVAASLLTIFFAVPVTAVQGIKLEKLEKLVFP  
MAMELIPGLSSITGYLPSAILKGFYVVPFAMLGMAKLGGSISKSKEEIKACNMVFYFLVGNVFFL  
SLISGSLDELGEYFTHPRSIPSHLASAVSSQADFFVTYILT DGLSGFSLEILQPGLLWDAVKSH  
NPYLY---  
SLPYFRIIPSVLSILIGMVYAVVAPLLL PFLVGYFYLG YVVYVQIEDVYETAYDT CGQYWPYVH  
HYIFVGIILMQITMIGLFGLKSKPSASIA TIPLLLL TIMFNEYCKIRFLPTFRHYSVKDADEHMEINCE  
NARSAYCQP  
>Populus\_trichocarpa\_B9H0G3  
----ILSALLTSVGINLGLCLLFFTLYSILRKQPGNFYVYAPRLVDK-E-KSQPQ-  
LPSAGWVRNAWQLSEDEILSISGLDGLVLTRIFTFLKVFTVAGVIGISILLPINYFGNQLS-  
NKSLDSFSISNVNDGSNRLWVHFSAA YIFTGVV CYLLYEHNYMSAKRIAYFYSSK--  
PQPHQFTILVRSIPSK-  
NFSETVESFFTESTYLSHSMVHRTSKIQDLINDADKLYRKLDCMKSNNHSQ----  
QNFRRTDGRKVNLLDLYEKKLEDLEDNLRKEQNLLAGE-  
EVPAAFVVSFKSRFGAAVALHIQQGVNP-  
TEWVTERAPEPQDVHWAFFSASFIKRWIFKLVVLVASFALIVLFLIPVVIVQGLANLDQLEKWFPF  
LKDILSLTVVSQVITGYLPSLILQLFLSFVPPIMLTFSAIQGYISRSQIERSSCSKMLWFIWNIFAN  
VLSGSALYLVNVFL-  
EPKNIPRVLAEAVPGQASFFISYVVTS GWTNLSSELFRLIPLVCSFWKRLEFEVP---  
SIPYYNDIPTILFFGLLGITYFFLSPLILPFLLVYFCLGYIIFRNQLLN VYAPKYETAGMFWPIVHNST  
IFSLILMHIIAIGIFGLKKLPLASSLIIPVLT LIFNAYCQKRFLPLFKAYPTECLIKKMTEFYDKLVTA  
YQDP  
>Populus\_trichocarpa\_B9HH28  
IPDPWYGNIQYLLNISTIGLFFCIFI FLFAKLRS DHRR-----  
SALTTKLLAVWHATGREIASHCGADAAQFLIIEGGSFAVVF SIGVLSTGVLLPLNVYGGSSQ--  
NDEFSKTTINHIEKGSSFLWIHFVVFV VLLVHFGMSLIEKRLKVTRFRD-----  
NANSTAAFTIMVQGLPKSIGDDRR LQEYFQY GKIKYKVTVPVDLCAFDDLATELIKVRDEITWLVV  
KIDSRL-----EELRILLELRVELETKLA EYKEG--  
RAPGAGVAFVIFKDVY TAKQAVQDFCESVRLQQWKVERAPLAPDIYWNHLGSSKLSMRLRRLF  
VNTCLLLMLVFFSSPLAVISALNSAGRIINAQSWLDWVQSS-  
WLASLIFQFLPNVIFVSYIIIP SALSYSKFERHLT VSEEQRAALLKMVCFFLVNLILLRGLVESSLE  
SAGCYLDGDR-  
IQYMSASFLSRSCFSSLAFLITSTFLGISYDLLAPIPWIKKKIQKFSGTPIPKQTFDFAQYYAFNLTI  
FALTLIYSSFAPLVVPVGAVYFGYRYVVDKYNFLFVYRVRGGNDGRLMDTVLCIMRFCVDLFL  
SMLLFFSVQGD SMKLQAIFTLGLLVLY--KLLNDSFQPALERIQNDSI-----VEGPIDYEVFSQP  
>Populus\_trichocarpa\_B9HZA2  
---ATLGDI AVSGALNLLGAFIFLLAFAILRIQPFNDRVYFPKWYLKG--  
LRSSASTRFLNWMPEALKMPEPELIDHAGLDSAVYLRIYLMGLKIFVPIAFLAWAILVPVNYTNDT  
LEKASDIDKLSISNVPLKSQRFWAHIVMAYAFTFWTCYVLLKEYEKIASMRLQFLSSEG--  
RRPDQFTVLVRNVPPE-  
SVSELVEHFFLVHHYLIHQVVCNANKLASLVK KKKSKQNWLDYYQLKYDRNQSQ-  
RPLKKTWGEKVDAIDHHISEIKLSEEIEEEREKVLPKSIMPAAFVSFKTRWGAAVCAQTQQSR  
NP-  
TLWLTEWAPEPRDVY WENLAIPYMSLSVRRLIIGVAFFFLTFFFMIPIASVQALASIEGIEKKAPFL  
KPIIEIKFIKSVIQGFLPGIALKLFILFLPTILMIMSKFEGFLSISSLERRSATRYYIFLIINVFLGSILAG  
AAFEQLNSFIQSANEIPKTIGVAVPLKATFFITYIMVDGWAGIAGEVLMKPLILYHLKNFREEAM  
DPGSLGFNTGEPRIQLYFLLGLVYATVTPVLLPFIIFFAFAYVFRHQIINVYNQEYESGA AFWP  
DVHGRVITALVISQLALLGLMSTKEAAQSAPFLIALPVLT IWFHGF CNGRHKSAFVKYPLQEAMM  
KNFNLKAYLQDAYIHP  
>Populus\_trichocarpa\_B9IAI0

---ATISDIGVAAAINILTAFAFFIVFAILRIQPVNDRVYFPKWYIKG--  
LRSSPLVRFLNWMPAALQMPEPELIDHAGLDSAVYLRIYLTGLKIFVPIAFLAFTISVPVNWNTNT  
LE-YSDLDKLSISNIPTGSCRFWTHMVMAYAFWTCYVLKTEYETVAKMRLHFLASEK--  
RRPDQFTVLVRNVPPE-  
SVSELVEHFFLVSDYLTHQVVYNANELSNLVNKKKKMKNWLDYYQIKYSRNQSR-  
KPSLKTWGNRVDAIDHYTSEIERLSREISLERDKIVPKSIMPAAFVSFKTRWGAAVCAQTQQR  
NP-  
TIWLTGWAPEPRDVYWDNLAIPFVSLTLRRLVIAVAFFFLTFFFMIPIAFVQSLANIEGIEKALPFL  
KPIIEMKVIKSFIQGFLPGIALKIFLIFLPSILMLMSKFEGFISLSGLERRSAARYYIFQFVNVFLGSII  
TGTAQQLDNFQISATQIPKTGVVSIPMKATFFITYIMVDGWAGVAGEILRLKPLIYHLKNFKKEA  
MDPGTLGFNTGEPQIQLYFLLGLVYAVVSPILLPFIIVFFALAFVYRHQIINVYNQEYESAAAFW  
PDVHGRIIVAVIVSQLLLMGLLSTKEAAQSTPLLITLPILTIFHLFCKGRYEPAFVRYPLQEAMM  
KNLNLKSFLQNAYSHP  
>Populus\_trichocarpa\_B9MUA6  
---ATLQDIGVSALINILGAFALLAFALLRIQPINDRVYFPKWYISG--  
GRSNRFTFLNWMPQALKMTEAEIINHAGLDSAVFLRIYTLGLKIFVPITILALLILIPVNVSSGTLF  
FMSDIDKLSISNVRPQSIRFFIHIALEYAFTIWICFMLYKEYDHALMRLRFLASKR--  
RHAEQFTVVVRNVPHR-  
SVLDTVEQFFQTNTYLCQQAVYNANKFAKLVRKRDRQLQNWLDYDYNQLKFERHPDK-  
RPTRKNWGERVDSIEHYKQQMKHLEKNMASERQTILSKSILPVSVFNSRWGAAVCAQTQQ  
SKNP-  
TLWLTNWAPEPRDIYWRNLAIPFMSLTVRKLISVTVFALVFFYMIPIAFVQSLANLEGLEKVAPFL  
RPVIELKFIKSFLQGFLPGLALKIFLYILPTVLMIMSKIEGYIAHSTLERRAAAKYYYFMLVNVFLGS  
IIAGTAFEQLDAFLQSPTQIPRTIGVSIPMKATFFITYIMVDGWAGIAGEILRLKPLIIFHLKNMIERA  
MDPGSVDFPETLPSLQLYFLLGIVYAVVTPILLPFVLVFFAFAYLVYRHQIVNVYNQQYESAAAF  
WPHVHSRIIASLLISQLLLLGLLSTKKAANSTPLLVLVTLVLSFHKYCKIRFEPAPFRKYPLEEAMA  
KDMNLKAYLADAYLHP  
>Populus\_trichocarpa\_B9MXB5  
IPDPWYGNIQYLLNISTIGLFFCIFIPLFAKLRSDHRR-----  
SALATKLLAVWHATGREIALHCGADAAQFLIIEGGSFVVVLSIGVLSICVLLPLNMYGGSQ--  
NDEFKTTINHIEKGSSFLWIHFVIVVIVVLLAHFGMSLIEKRLKVTRFRD-----  
NANSIAIFTIMVQGLPKSIGDDRRQLQEYFQHGKIYKIMPMDLCAVDLATELVVRDEITWLVAK  
IDSRRL-----EELRRLQELRVELETELAEYKEG--  
RAPSAGVAFVIFKDVYTANKAVQDFRESVRLQQWRVERAPLAADIYWNHLGSSKLSLRLRRLF  
VNTCLLLMLLFFSSPLAVISALNSAGRIINAQSWLDWVQSS-  
WFASLIFQFLPNLIIFVSYIIVPLVLSYMSKFERHLTVSGEQRAALLKMVCFFLVNLILLRALVESSL  
EGTGCYLDGDR-  
IQYMSASFLSRSCSSLAFLITSTFLGISYDLLAPIWIKKKIQKYSRTPIPKQTFDFAQYYAFNLTI  
FTLTLIYSSFAPLVVPVGAVYFGYRYVVDKYNFLFVYRVGGNDGRLMDTVLCIMRFSVDLFL  
SMLLFFSVHGDSTKLQAIFTLGILIMY--KLLNDSFQPALEGIQADSI-----VDGPIDYEVFSQP  
>Populus\_trichocarpa\_B9N8E6  
---ATLEDIGVSAAINLLSALIFLFLFAILRLQPFNDRVYFPKWYLKG--  
LRNSPSIQFLNWMPQALKMPEPELIDHAGLDSAVYLRIYLMGLKIFVPITILAWVVLVPVNYTNN  
LEAASDIDKLSISNVPLKSQRFWAHIVMAYAFWTCYVLLKEYEKVASMRLQLSSER--  
RRPDQFTVLVRNVPPE-  
SVSELVEHFFLVVDHYLTQQVVCNANNLASLVKKNEGMQNWLDYYRFKYSRNRSQ-  
RPQTKTWGAKVDAIDYYISEIEKLSKEITEEREKVLPCIMPAAFVSFKTRWGAAVCAQTQQR  
NP-  
TLWLTEWAPEPRDVYWPNLAIPIVSVLVRRLIIGVSFFFFLAFFMIPIAFVQSLASIEGIEKSLPFL  
KPIIEVEFIKSVVQGFLPGIALKFLILLPTLLMMMSKFEGTLSSLERRSAMRYYIFIIINVFLGSI  
LTGAAFEQLDSFIQSASEIPKTIGVAIPMKATFFITYIMVDGWAGIAGEVLMKPLIYHLKNFRKEA

MDAGSLGFNTGEPRIQLYFLLGLVYAPVTPILLPFIVMFFGFAYVVYRHQIINVYNQEYESGAAF  
WPAVHGRVITALVIAQLMMGLLSTKQASSTTPFLIALPVLTIWFHVFCNGRYKSAFVKYPLQEA  
MMKNFNFRSYLEKAYVHP

>Populus\_trichocarpa\_B9N8E7

---ATLADIAVSGAINLLSAFIFLLAFAILRLQPFNDRVYFPKWYLKG--  
LRSSPSIRFLNWMPEALKMPEPELIDHAGLDYAVYLRIYLMGLKIFVPITFLAWAILVPVNYTND  
LEAASDIDKLSISNIPLKSQRFWTHIVMAYAFTFWTCYVLLREYEKVAAMRLQFLSSER--  
RRPDQFTVLVRNVPPE-

TVSELVEHFFLVDHYLTHRVVCNANKLASLVKKKKKKQNWLDYYQLKYSRNQSQ-  
RPQMKTFFGGKVD AIDHHISEIEELSKEIEEERTRVLPKSIMPAAFVSFKTRWGAAVCAQTQQR  
NP-

TLWLTEWAPEPRDVYWQNLAIPYMSLKVRLIIGVAFFFLTFFFMIPIASVQALASIEGIEKRAPFL  
KSVIEIKFIKSVIQGFLPGIALKFLIFLPTILMIMSKFEGFVLSLERRSATRYYIFLIINVFLGSILT  
GAAFDQLNAFIQSANEIPKTIGVAVPMKATFFITYIMVDGWAGIAGEVLMKPLIFYHLKNFREEA  
MDPGSLGFHTGEPRIQLYFLLGLVYATVTPVLLPFIVIFFAFAYLVFRHQIINVYNHEYESGAAFW  
PDVHGRVITALVISQLALMGLMSTKEAAQSTPFLIALPVLTIWFHRFCNGRHKSAFVKYPLQEAM  
MKNFNLKAYLQSAYVHP

>Populus\_trichocarpa\_B9NGP9

---ATLADITVSGAINVLSAFIFLLAFAILRLQPLNDRVYFPKWYLKG--  
VRGSPSIRFLNWMPEALKMPEPELIDHAGLDYAVYLRIYLMGLKIFVPITILALAILVPVNYTNNAL  
EAASDIDKLSISNIPLKSQRFWTHIVMAYAFTFWTCYVLLREYEKVASMRLQFLSLER--  
RRLDQFTVLVRNVPPE-

TVSELLEHFFLVDHYLTHQVVCNANKLASLVKKKKKKQNWLDYYQLKYSRNQSQ-  
RPQMKTFFGGKVD AIDHHISEIEELSKEIEEERTRVLPKSIMPAAFVSFKTRWGAAVCAQTQQR  
NP-

TLWLTEWAPEPRDVYWQNLAIPYMSLKVRRLLIIGVAFLLLTFFFIIPIASVQALASIEGIEKRAPFLK  
SVIEIKFIKSVIQGFLPGIVLKLFLIFLPTILMIMSKFEGFISLSSLERRSATRNYIFLIINVFLGSILTGA  
AFEQLNSFIQSANEIPKTIGVAVPMKATFFITYIMVDGWAGIAGEVLMKPLIFYHLKNFREEAMD  
PGSLGFHTGEPRIQLYFLLGLVYATVTPVLLPFIVIFFAFAYLVFRHQIINVYNHEYESGAAFWPD  
VHGRIITGLVISQLALMGLLSTKEAAQSTPFLIALPVLTIWFHRFCNGRHKSAFVKYPLQEAMMK  
NFNLKACLHSAYVHP

>Rattus\_norvegicus\_D3ZNF5

LQQPFGGIPTVLLNIIWVVCVVLVYSFLRKAADYDYG----  
RLLHNDSSPSEVYKGFSTWFFNSLTMRDRDLINKCGEDARIYIMFYHLIIFVLILCIPSLGIILPV  
NYIGSAL--SSHFGRTTIVNVSTESQFLWLHSIFAFMYFLT NF AFMGHHCLGFVP-----  
KKNLHFTRTLMITYVPTEIQDPETISKHFHECVVTRVHFCYDVRNLIDLDDQRRHAMRGRLYYTA  
KAKKTGKKVHPCS-H--KEVDAEQYSELEEQLTDEFNAELNRV-  
QLKRLDLIFVTFQDARTVKRIHNDYKYSSIVKHWRVARAPHPKDIWKHLSIRRFSSWWARFIANT  
SLFFLFFFLTTPAIIINTIDMYNVT-----

RLQSPVVTQFFPSVLLWAFTVIMPLL VYFSAFLEAHWTRSNQNLIIMYKCYIFLVFMV/VILPSMGL  
TSLDVFLRWLHA---

TIRFQCVFLPDNGAFFINYVITSALFGTGMELMRLGSLCTYCTRLFVHIKNLAMDFQFGREYAW  
MLNVFSVVMAYSITCPIIVPFGLLYLCMKHITDRYNMYYSYAPT-  
KLNAQIHMAAVYQAIFAPLLGLFWMLFFSILRVGSLHSITLFSLSIIISVIIAFSGVFLGKFRIAQQE  
QP-----SPARHTY---

>Rattus\_norvegicus\_D4A105

LQGLPFGGVPTVLALDFMCFLLALLFLFSI-RKVAWDYDYG----RLLDADTS-  
VSSSVNGFCSWLTAIFRIKDD EIRDKCGGDAVHYLSFQRHIIIGLLVVVGVLSVGIVLPVNFSGDLL  
--AYSFGRTTIANLKSGNLLWLHTSFAFLYLLLVYSMRRHTSKMRY-----

KEDDLVKRTL FINGISKYAES-  
EKIKKHFEECTVLEARPCYNVARLMFLDAERKKAERGKLYFTNLQSKENVNPKPCG-H--

EQVEAIEYYTKLEQRLKEDYRREKEKV-  
NEKPLGMAFVTFHNETITAIILKDFNVSSALHNWTVTYAPDPQNIYWEHLSIRGFIWWLRCLVINV  
VLFILLFLLTTPAIITTTMDKFNV-----  
KLNNPIITQFFPTLLLWCF SALLPTIVYYSAFFEAHWTRSGENRTTMHKCYTFLIFMVLLLPSLGL  
SSLDLFFRWLEA---  
AIRFECVFLPDNGAFFVNYVIASAFIGNAMDLLRIPGLLMYMIRLCRNVRHQAYEFQFGAAYAW  
MMCVFTVVMYTSITCPIIVPFGLMYMLLKHLVDRYNIYYAYLPA-  
KLDKKIHSGAVNQVVAAPILCLFWLLFFSTMRTGFLAPTSMTFFVVLVITIVICLCHVCFGHFKYL  
SANYK---S---SGDEPPS---  
>Rattus\_norvegicus\_D4A2I3  
LQGVTFGGIPTVLLLDVGCFLVLILVFSIIRRKFWDYG----RILEAGSS-  
SSSGQLGCCSWLSAIFRLHDDQILEWCGEDAIHYLSFQRHIFLLVVVSFLSLCVILPVNLSGDLL-  
-PYSFGRTTIANLQTDNDLLWLHTVFSVIYFLTVGFMWHHTRSIRY-----  
KEESLVRQTLFITGLPREARK-  
ETVESHFRDCEVVDVQLCYSVAKLINLCKERKKTEKSLTYTTLQVKTGRNPKPCG-Q--  
EREDAISYYTRMNDLSLTERITAEECRV-  
QDQPLGMAFVTFREKSMATFILKDFNASSELCKWSVTFASYPEDICWKNLSIQGVRWWLQCLG  
INFSLFVVLFFLTTPSIIMSTMDKFNV-----  
KLNNPVISQFFPTLLLWSFSALLPTIVYYSTLLESHWTRSGENRIMVSKVYIFLIFMVLILPSLGLT  
SLDFFFRWLDT---  
SIRLECVFLPDQGAFFVNYVIASAFIGSGMELLRLPGLILYTFMIRNVQNQAFEYEFGAMYAWM  
LCVFTVIMAYSITCPIIVPFGLIYILLKHMVDRHNLYFAYLPA-  
KLEKRIHFAAVNQALAAPILCLFWLFFFSLRLGLTAPATLFTFLVALLAILACLLYTCFGCFKHL  
PNYK-----QQQTY---  
>Ricinus\_communis\_B9R6U4  
----DIAALLTSAGINIGLCIVLLSLYSILRKQPSNRVVYFGRRLAS-V-RIR---  
VPSPSWIVKAWETTEEEIILAIGGLDALAFQRMLIFSIRVFSIAAVICLLLVLPMNYYGKEM--  
SESLDVFTIGNVKEGSRWLWAHCLALYIISCAACVLLYFEYKSITEMRLAHITKSS--  
LNASHFTILVRSVPWE-SYSETVKKFFANSSYLHQMVYKRGLIQKLMVDAEKMCMIIPVPID---  
-----RPSLCGKSTTSFKILASEAESVKDSISIALDNVAEN-  
ECAAFAVFFKTRYSAVVATQMLQSPNP-  
MLWVTELAPEPHDVLWSNLSIPYKQLWLRKIATLLAAIVFMFLFLIPVTFVQGLTQLDKLSRTFPF  
LRGLLKKDFMNHVVTGYLPSVILMFLYTVPPVMMLFSSVEGPVSRSGRKKSAGLKILYFTIWN  
VFFVNVLSGSGVISQLNVFS-  
SVRDIPMELAKAIPTQASFFMTYVLTSGWAGLACEVMQLFPLSCNMFKKFSDDL---  
TFPYHTEVPRVLLFGLIGFTCSIMAPLILPFLVYFSLAYLVYRNQILNVYIPKYEGGGHFWPIVHN  
TTIFSLVLTQIIALGVFGIKESPVASGFTFPLVIGTLLFNEYCRLRFSPIFDKDPIKILIEEMMDQIYQQ  
LHSAYCQF  
>Ricinus\_communis\_B9RGD1  
----KPESLAASAGINFGALIVLSLFSIFRKQPSNALIYYSRRLSK-G-HR---  
VLPSVSWIPRAFRVTEDEILQTSGLDALLIIRLFKFGIKFFGVSSIIGLVLLPVNYGGQ----  
YHTMDSFTISNVCRGSNRLWVHFTCLWVVSFYGLYLLYKEYNEVLKRIQQIRDFR--  
HRPEQFTVLVRQIPLHNALGCSVGHFFSKASYHSHQMLYDAKEIENLLKQAKYLTEKIEGLRGR  
STVK----KHGKECSGVDALKITLLEEKVQEIYHDIRQSQGEIMGK-  
ELPVAFATFKSRSGAALVAQSQQHNSP-  
LLWITEMAPEPRDVSRRRLAIPYKYLPIYKIGVIVSASLLTIFFAVPVTAVQGIKFEKLLKWFPPA  
MAIELIPGLSSIVTGYLPSAVLKGFIYVVPFAMFGMARVGGISISKSKAEIKACNMVFYFLVGNVFF  
LSLISGSLLEIGEYLSHPKNFPSHLASSVSAQADFFMTYILT DGLSGFSLEILQPGMLLWDSIML  
HNPYLF---  
SLPYFRIIPSVALSMLIGMVYAVVSPLLLPLLVGYLCLGYIVYVNQIENVYETVYETSGLYWPYIHH

YIFVGIILMQITMIGLFGGLKSKPAASIAITLLLLMTIAFNEYCKIRFLPTFGHYSIQDAVEHLEIKCEYA  
SNAYRPP

>Ricinus\_communis\_B9RXG3

---ATLGDIGVSAAINLLTAFIFLLAFAILRLQPFNDRVYFVKWYLKG--  
IRSSPTLRFLNWMPEALRMPEPELIDHAGLDSAVYLRIYLLGLKIFVPIAFLAWAILVPVNWTNST  
LELSSDIDKLSISNIPLHSQRFWAHIVMAYAFTFWTCYVLMKEYEKVATMRLQFLASEK--  
RRADQFTVLVRNVPPE-  
SVSELVEHFFLVDHYLTHQVVYNANKLSKLVKKKSMQNWLDYYQLKYSRDKSL-  
RPLLKSWGKQVDAIDHYTSEIEKLSKEIVEERERVEPKAIMPAFVSFKTRWGAAVCAQTQQSR  
NP-

TLWLTDWAPEPRDVYWHNLAIPYVSLAIRRLIMGVAFFFLTFFFMIPIAFVQSLASIEGIEKRAPFL  
KPIIEIKFIKSVIQGFLPGIALKFLIFLPTILMIMSKFEGFASLSSLERRSATRYFFNIVNVFLGSIIT  
GTAFEQLNSFIQSANDIPKTIGVAIPMKATFFITYIMVDGWAGIAGEVLMMLKPLIIFHLKNFREEAM  
HPGSLGFNTGEPRIQFYFLLGLVYATVPTLLPFIVFFAFAYVFRHQIINVYDQEYESGAAFWP  
DVHGRVITALIISQVLMIGLLSTKRAAQSTPFLIVLPVLTWIFHRFCKGRYEPAFVKYPLQEAMMK  
NLNLKPFLQNAYRHP

>Ricinus\_communis\_B9S1E8

---ATLGDIGVSAFINIVSAFAFLAFALLRIQPVNRYVYFVKRYISG--  
ERSSPRLTFLNWMPQAMRMSESQIINHAGLDSAIFLRIYTLGLKIFIPITVALLILIPVNVSSGTLF  
FLSDIDKLSISNVRPKSIRFFVHIALQYLFTIWTCTFLYKEYDIVASMRRLRFLASQG--  
RHAEQFTVMVRNVPHQ-  
SKSDTVEQFFKTNTYLCHQAVYNANKFAKLVRKRDRLRNWLVDYNQLKFERHPDK-  
RPTRKGGWGERVDSIDYKQQIQELEKRMAMERQKILPKSMLSVAFVSFNSRWGAAICAQTQQ  
SNP-

TLWLTNWAPEPRDIYWRNLAIPFVSLIRKLIISLVFALVFFYMIPIAFVQSLANLEGLEKVAPFL  
RPVIELEFIKSFLQGFPLGALKIFLYILPTILMIMSKIEGYIAVSTLERRAAAKYYYYFMLVNVFLGSIIT  
TGTAFFQLHSFLQSPQTQIPRTIGVSIPMKATFFITYIMVDGWAGIAGEILRLKPLVIFHLKNMREKA  
MDPGSVDFPETLPSLQLYFLLGIVYAVVTPILLPFILVFFALAYLVYRHQVINVYNQQYESAGAFW  
PHVHSRIIASLLISQLLLMGLLSTKEAANSTPLLILPILTLAFHKYCKNRFEPAFRKYPLEEAMAK  
DLNLKSCCLADAYLHP

>Ricinus\_communis\_B9S919

----LVSALLTSLGINSGLCVLFFVFYSILRKQPSNYEVYAPRLLAE-G-NSK---  
IPSPGWISKAWKLSEEDILLSSGLDAVFMRLITFSLKVFSAFAGIIGIFVLLPVNCLGTQLQKSNSL  
DVFTISNVNYGSKWLWMHFCAVYMISIFICYLLYNEYKYISSKRIAYFYSSK--  
PQP HQFTILVRGIPVS-SISETVERFFTETTYLSHMVRRSSNLRSLVTEAKKLYTRLLHLQSEP-  
SH----QKYRR-FGENVDLVDHYEKKLEDVEQNVKLEQSDLSGE-  
ETRAAFVSFKSRYGAAVAFHLQQSVNP-  
TQWVTEQAPEPDDVYWPFFSSSFMRWISKLVVVACILLTILFLIPVVVVQGLTNLSQLEIWF  
FLKSILTITFVSQVITGYLPSLILQLFLKIVPPIMEFLSSIQGYISHSDIEKSACNKVLWFTIWNIFAT  
VFSGSVLYQVNIFL-

DPKNIPAKLAVSVAQASFFVAVVVTSGWTSTSSSELFRIIPLICSLATRCELEVP---  
SIAYHKDIPRILFFGLLGITYFFLAPLILPFLLVYLCLAYIIFRNQFMNVYAPKYETAGKFWPIVHNS  
MIFSLVLMHAIAGIFTLKKLSTASTLIFPLPVLTLFNEYCRKRFLPIFIAYSAEVLIKKMHEFFDKL  
VTAYQDP

>Ricinus\_communis\_B9STM2

---ATLSDIAVAAAAILGAFAFFLAFAILRIQPVNDRVYFVKWYIKG--  
LRSSPILRFLNWMPPAALQMPEPELIDHAGLDSAVYLRIYLTGLKIFVPIAFVAFTVLVPVNWTNST  
LK-YSDLKLSISNIPMGSSRFWTHLMVMAFSAFWTCYVLKKEYEIVASMRHLFLASEH--  
RRPDQFTVLVRNVPPE-  
SVNELVEHFFLVDHFLTHQVVYNANKLSELVNKKKMRNWLVDYYQLKYSRNQSR-  
KPSVKTCGDSVDAIDYYTSEIERLSKEISLERDNTVPKYIMPAAFVSFQTRWGAAVCAQTQQSR



NP-  
TVWLTEWAPEPRDIYWDNLAIPYVSLAVRRLVAVAFFFLTFFFMIPIAFVQSLANIEGIEKALPFL  
KSLIE---  
MXSFIQGFPLPGIALKIFLIFLPSILMLMSKFEGFISLSGLERRSATRYIIFQFINVFLGSIITGTAFQQ  
LNNFIQSANDIPKTIGVSIKATFFITYIMVDGWAGVAGEILRLKPLIYHLKNFREEAMDPGTLG  
FNTGEPQIQLYFLLGLVYSVSPILLPFIIVFFGLAYVVYRHQIINVYNQEYESAAAFWPDVHGRIV  
TALIVSQLLMGLLSTKQAAQSTPLLITLPVLTWIF--ICSAK-----DNAYIHP  
>Ricinus\_communis\_B9SVJ7  
----ILSALLTSVGINLGLCFLFFTLYSILKKQPSNRYVYAPRLVRS-Q-  
KSNQQLPSAGWVTRAWQLTDDHLISISGLDALVFARIFYFGLRVFAFGGIVGIFVLLPVNYLGN  
QLNRNKSLDSFSISNVDDGSNWLWMHFSAAVFTGVVVCYLLYYEYNYIFSKRIACFYSSK--  
PQPHQFTILVRGIPSR-  
SFSEVVESFFTQSTYLSHSMIHQTSKIRGLIDDAEKLYRRLAHVKTENHLR----  
QHFKRDFGKKNIVDHYEKKLENLEDNVRMKQRSLAGE-  
KVPAAFVVSFKSRFGAAVALHIQQGVNP-  
TEWVTEQAPEPQDVHWSFFSASFLRRWIYKLVAVFAFLILTILFLIPVLLVQGLANLYQLETWFPF  
LKGILSLTVVSQITGYLPSLILQLFLFFVPLMILFSSMQGYISLSQIEKSACTKVLCTLWNIFLA  
NVLSGSAFYMVNVFL-  
EPKKIPEVLAEAVPAQASFFISYVVTSGWTSLSSELFRLIPLICSFIKRLKFEVP---  
SIPYHSEIPTALFFVLLGITYFFLAPLILPFLLIYFCLGYIIFRNQLLNVYAPKYETSGKFWPIVHYST  
VFSLILMHVIAIGTFGLKKLPLASSLTIPLPVLTLFNEYCRKRFLPIFKAYPTECLVTKMAEFYDKL  
VSAYHDP  
>Ricinus\_communis\_B9T4A8  
---ANLQDIGYSAAVNLLSAIAFLIAFAILRLQPINDRVYFPKWYLKG--  
IRASPTIRFLNWMPAALRMPELELIDHAGLDSVYIRIYLLGLKIFVPITVLAFGVLVPVNWGTGETL  
EHYSDIDKMSISNIPPGSKRFWAHVMSYVFTFWTFYVIYKEYKRVAIMRLQFLASES--  
RRPDQFTVLVRNVPE-  
SITEHVEHFFCVDHYLSHQVVYNANKLASLVAKKSLQNWLIYYQNKYDRNPSV-  
KPTKKTWGTRVDAIDYYTSEIGKLEEEKERERVLPAVVPAAAFVSFKSRWGAAVCAQTQQS  
SNS-  
TIWLAERAPEPRDVYWDNLAIPYVELTVRRLMAVGLFFLIFFMIPIALVQSLASIEGIEKFLPFLK  
PLIEMKSVKSLIQGILPGLALKIFLIVLPIILMIMSKIEGFTSLSSLDLRRSAAKYHLFLLVNVFIGSIVT  
GTAMDQLKAFLESATEIPKTIGVSIPLRATFFITFIMVDGWAAIAAEILRLVPLALFHLKNTRDQAM  
DPGCVDFATSEPRIQFYFLLGLVYAAVTPLLLPIIVFFAFSYMVFRHQIINVYNQKYESGAAFWP  
DVHRRLIIGLIIAQLLLLGLLSTKDAEELTPLLVALPILTIWFHIFCKGRFESAFVKFPLQDAMVRTL  
NLRIYLHDAYVHP  
>Ricinus\_communis\_B9T723  
IPNSWYGNIQYLLNISTIGLLFCIFIFVKLRSDHRR-----  
SALISKLLAVWHATGREIARHCGADAAQFLIIEGGSFVLLGIAVLSICFVPLNLYAGTA--  
DDQFSKTTINHIEKGS AFLWVHFV FVIVVVLVHFGMSVIEERLKITRFRD-----  
NADSTAIFTIIVQGLPKSLGDDRSLREYFQHGKVFVIVPMDLCTLDDLATELVIRDEITWLVAR  
MDSRLL-----EEKLRKLQEVRAELETDLAAYKEG--  
LAPSAGVAFVIFKDVYTANKAVQDFRESIRLQQWKVERAPLATDIYWNHLGSTKLSLRLRRLFV  
NTCLLLMLLFFSSPLAVISALTSAGRIINAQSWLAWVQSS-  
WFASLIFQFLPNVIFVSYIVVPSALSYSKFERHLTMSGEHRAALLKMCFFLVNLILLRALVSS  
LESAGCYLDGDK-  
IQYMSASFSLRSCLSSLAFLITSTFLGISFDLLAPMPWIKKKIQKFSRTPIPKQKFDFAQYYAFNLT  
IFALTLIYSSFAPLVVPGAVYFGYRYVVDKYNFLFVYRVRGGNDGRLMDTVLCIMRFCVDLFL  
SMLLFFSVQGDSTKLQAIFTLGLLVMY--KLLNDGFLPALEGVQTDSI-----VDGPTDYEIFSQP  
>Saccharomyces\_cerevisiae\_NP\_013096.1

HAGISLKGFIGSILFSFLYFLFQLSLFIIL--RSRFKTIYQANVVLKIG-  
SKVCFAKNYWSLFAFLKQLPGRMLNERYGLDNYLFLRFLKLLIFFFAVLSIINIPILIPHIYFSRDILK  
TSKLDKWTMSNL-NSSNTLICHFLSIFVVLWFHFILSSELRFVNRLGYSVLTCKSKYQNILYLEGF-  
----SSKLVTSQILETFFQPFVTH-  
FIPKNLKKVHKLEIKLNKLQKSKEQIIFEIILEKYSIFPLYKYIIRKEKLIKQVNSLKATSETKQALPD  
DLSTDIYMDKMFITFKSTLLSNVIGELLSYRLP-  
TQNLKVIQPNVNDIWRNIDSSPLWKSAYFSA NILRIFVIIGWILPVAFLGLISQIPNISSLIPFTKIIH  
FQSFIREVAKNLIPIVTLIIIEIVPYFFRWLSYLRGLKTGAQIEADVQNWYFVVFHILFVVVTISSG  
FSIIERLLNNPVSIPALLANDLPKCANFFCSFVLIRGMAYAGGNLLRIKELLFELFYKQFKLKTSL  
FFQLGSIYPIFSVLCIGIYISVAPIIILLCISFSMVFFSFSYLFKYQYKNYSETFGKLYIQALMQL  
YAGIYFMEFCLLGLFTLFDQYTLSTIMLVVFALTVITHSKISKQIKSKPQRIPTLEYSNLEERKDQF  
CQESYTFH

>Saccharomyces\_cerevisiae\_NP\_013342.1

FRKPTAKVVTTQLTIATSLGIFALLSFSILLKKWPR--LYASRRK-----  
SSLFGWLTVLYKIRDEQILEYAGLDAYVFLSFFKMCIKLLSIFCFFSVCVISPVRVYHFTGKID-----  
----ERTNVYLWMYVLFTYFFTFIAIKMAVAETKHVVSTRQAYLGKQ---  
NTITDRITRLSGIPIELRDSEALKTRIEQGTVSSITICREWGPLNKLHFHCRKKILKNLEECILYSQISL  
-GERPKMKIFGKEVDAIEYLEQQLKFIDAEIIEARKQ--  
HYSATPTAFVTMDSVANAQMAAQAVLDPRV-  
HYFITRLAPAPHDIKWDHVCLSRKDRLTKVYSTTVFIGLSSFLVIPVSYLATLLNLKTLKFWPS  
VGQLLDHWAANIVTGLLPTYLFTLLNFGIPYFYEYLTSYQGLVSYSEEEISLVSKNFFYIFVNLFL  
VFTLAGTASNYWAYLSDT-  
TKIAYQLATSVKEFSLFYVDLIIQQGIGMFPFKLLLVGSLIGFPLVKIRNELYNPPIFNFGQLQPIL  
ILIITLIYSVMSTKILTSGLAYFIIGFYVYKYQLIFATDHLPHSTGKVVPLIFRRIIVGLLLFQLTMTGT  
LAFEGGWVLSSCLFPLPVVTLCLFLYDFEKNYLPLSKYIALSSIREYSTVNSANEEESYAYP

>Saccharomyces\_cerevisiae\_NP\_013993.1

STNTSTQQVVTSLVSNGTIFGVFVIAFLIL--RIKLRKIYEPKSSFNLE-  
EKKPEPQGVWQWLKPLLKSDNFVIQQAGLDGYFFLRYLFIIAIYCAVMSYIFPILLSINASNGN-  
-H-SGLNQLAYQNV---  
RGRYFAHVFCGWIFFWGLFYIYRELYFYTSMKQAVLASPRYAKKLSSRTVLFQTPKQYLSEE  
EFSKLF--  
DGVKRVWIARGSGSIEAMVKARDNMAIQLEGAETKYLKAALKKRPHHKIFGKKVDTISYIKEELP  
KLNQKVKALQEDHENSFPNSVFEFESQYQAQVAAQITTYHAP-  
LFMTPVIGIEPSDVVWFNLRMFWWERLGREVSASVAIVALVILWAFPVAFVGMISNITSLTNEVK  
WLKFIYKLPQLLGLLTSAPTVALAVLMSFLPKFIRGMAITQGAPSKQNVEYFTQQAYFAFQVIQ  
VFLVTTLSSAATSTVTEIVKEPTKAMDLLASNLPKASNFFMSYVILQGLSISGALLQIVPLILFYVL  
GAKWNFCGLSSMQWGTAFPVYTNLAVITFSYSIISPLILLFAAVAFFLLYIAYLYNLTYVYQESPD  
ARGIYYPRALFQTIVGIYIGQICLLGLFAVGKGWGPIVLQVIGICVTVLIHLHLSAAFHLSKVIPVD  
TMKPLERVNDFDISHAYDYP

>Saccharomyces\_cerevisiae\_NP\_014557.1

ADSSSTSAFISTLIYGLTAVVFWLFLLL--RPKNRRVYEPRSLIQTE-  
EERTEPEGYFGWVEYLLSKPHSFLIQHTSVDGYFLLRYIGIVGSLSFVGCLLLLPILLPVNATNGN  
--N-QGFELLSFSNV---  
KNRFYAHVFLSWIFFGLFTYVIYKELYYYVFRHAMQTTPLYDGLLSSRTVIVTELHKSIAQEGE  
MQMRF--  
PKASNVAFAVDLSDLQELCKERAKNAKYE AALNKVLNKC VKKRPKHRLGGKKVNTLSYSSKRI  
GELNEEIHKEQADWASNDRQPACFIQFETQLEAQRCYQSVEAILG-  
KKNKGKRIGYSPEDVNWGSMLRLLSSKERHSRRAVANTIMVLLIIFWAFPVAVVGIISNVNFLT DKVP  
FLRFINMMPFLMGVITGLLPTIALVVLMSLVPPFVIMLGKLSGCVTRQETDLYSQAWYYAFAVIQI  
FLVVTATSSASSTVDSIIDRPRSAMTLLANNLPKASNFIYIMYFILKGLTGPTWTILQAVNLLL SKVL  
GRKWNYNLATPRMGIVYPGIEILVCIYICYIIAPILLFFSTVMLTLLYVAYLYNLNYVFGFSFDLK

GRNYPRALFQIFVGIYLSEVCLLGLFIMAKTWGPLVLEVFWIVVTALAHYMKRKFIPLFDVAVPLS  
AIRHAIEYDEEYLSSAYTDP  
>Schizosaccharomyces\_pombe\_non\_NP\_593089.1  
LKTDPSSDLRTQFWLAFLLGASACVFFCFRKRWK---LYAPRTI-----  
SSYYKWLMDLVNIPDDVVQNCAGLDGYVFLFFKMGIKFLSFASLLGVLIMPVNHFRG----  
DAFGNITLSNVQPGDGFLYLYVLFTYFISIFLLYVLFSSTKSIADIRQSYLARQ---  
NRLTDRTVFISGLPNELCSTENLKAYFDKGSIDSLICRNYSYMDILLSKKSKEYVKKLEKYWSIYL  
SNCKQCHPLI--FGQKIDAIDFYSAKLYKISQQIENARSF--  
DYPTTGQAFITFESMATAQIVAQTHIDSK--  
SGLHIELAPAANDIQWHNTYIGRWKHFQGWFITLVTFMILLWTVPVGAIAVFINLDTIRRLWPE  
LGRMIEDLFLNSLLRFTLPTLVYSLFISSPFLFRWLSSMQGLSSRAEEEIYAVGKNYAYLFFVNF  
LVYVIAGS-TSIW-  
ELAKDTTSFAHFLANRLPHQAQFFIDLIVLQGIGMFPLKLIQLGKLSSYFVRRSSKFFETPDSFSV  
GIFLPQPMFIMLICLCYSIISPLILVFGLIYFIIGFLVYKYELIYQMEHPQHSTGELWSTIFLRMIFGC  
VIMQLTMMGLMSLRKAYWLSTVIFPLLCFTVISAYNFSTMIRSSMQFVSLYIITHQSESRNSESS  
GSYVHP  
>Schizosaccharomyces\_pombe\_NP\_592939.1  
SSSSSTSAFVSSLVFNFAIFCAFIGLFLCL--RPREKHVYQPRCIIDTK-  
EEKPEPSSPFGLFAYVVKRSETYLIQYAGVDGYFFIRYLFTFGALCILGCLVLPILLPVNATNGV-  
-G-KGFDILSFSNV---  
HNRFYAHVFLSWLFFGFTIFIYRELRYVIFRHAMQSSGLYNNLPSSSTMLLTELPNVNLNDEEL  
HELFF--  
PNASEFTCVRDLKLEKVKKRSDLGNKYESTLNSLINKSVKKRPTHRLIGKKVDTIDYCRDTIA  
ELDEVVDKLQTSLEERKKVGSVFIRFRSQTDLQTAYQAFLYSK-  
FYRGRAVGIAPEDIVWSNLDLSMYTRRGKKTISNTILTLMIIFWAFPVAVVGCISNVNYLIEKVHFL  
KFIDHMPKLLGIITGILPSVALSILMSLVPPFIKFLGKFGGALTVEIENYCNQWYYAFQVQVFLV  
TTMTSAATSAVVQVIKEPASSMTLLASNLPKASNFYISYFLLQGLSIPGGALLQIVTLLLSKVLGR  
KWNWNQLSAPSWGTVYPVYSLLVTIMICYSIAPIIIGFAAVFVLIYFAYSYNLIYVLGHNADAKG  
RNYPRALFQVFGVGLYLAEVCLIGLFLAKNWGATVLEAVFLGFTVACHLYFKYKFLPLMDAVPIS  
AIESV---PVRVRNVQYVSP  
>Schizosaccharomyces\_pombe\_NP\_595232.1  
QAKFDKYSILVSLGFSSLLSVILLCIFTLL--RTKF-NTY-----  
DRCIPPKSLWGWIEPLWSIKVEDCLYNMGADAVISLLFSRFCRDVFLILAAICCTILIPINIVATNKT  
LQNAYAKLSIQNVGTG-N-  
WTVAHVVICYVFNVLVFLFLARYYQIVMRIRQRYRSPTYQQSMSSRSLIMDIPTTMRSNNGL  
SILASREAPMHVHICHAIKNLPKILKKHDNAVRSLEAVLAKFFKNPKDDRPVRR-  
TSEKVD AIDYYSAKIENYGLRVDAARESLE-YENFEHYGFITYKSSYIAHDTA--RHNSRV-  
AGASVSMAPESDFLWDNLSLAWSTRLFNRMIGNILFIILIAWIIETALVAIISNLYHLGSVWPWL  
QQQLTSRQFWSIVQGILSPAVAGFTFMILEIIMRRISYWQGSFTKSSRERGVNLKLIHIFTLDNFII  
YTLMAVFWRLGVIIAYKTKETVGLSVSSFFVQFSTFWIMFIAHSTC-  
SFFVEIAQPITLIRLIKTKLLEWTAPTKEYVYSQVLNKLIFFTIAICYACINPLVLLFASVLFVNYLT  
QKYILMYVSNSSSTESGGGYWRPVVNRILLGLELANIILFLCLWVQGGRRVAYCIIPNFSFAIAFKI  
WCMFALDPKSHYMIEDPYM--E-----SEMCFGHP  
>Selaginella\_moellendorffii\_D8QPN8  
----QLGGLVASAGINIGLAVIFYSLYSIFRKQRTNVNVYFPRYVLR-----  
VPSAGWIQRALQPSEEEIASCGLDAVLLRIFIFSMRFFAICTLIGVGILAPLNYTDNQVSHFDSL  
DLFTISNISNGSNRLWIHLAALYVISFSAYWLLHMEYKHVTQKRLEVLSTAR--  
PQPQYTVLRSIPREESYSASIDRFFSQHTYLSHQMVIRDWRVVRKKQTLESVKEIERLKQIA  
PHE----  
RPTCRDFGSKVDQLEFKSRKFEELFDDFREGQRELQGEAELPSAFVSFKSRWGAAMAAQTQ  
QAENP-

MAWVTDWAPEPRDVYWPNLISIPLLLSKLYAIGVWVAVFAIILTFVIPVGLVQTIQLENLRKWFP  
AIKIVLKIPGIKSVITGYLPSVLLSLLLIVPSLMLFLSKVEGHVSRSTQEREAARKVFFFLVGNVFF  
ISSLSGSLIDQLYAGFSEPKNIPNQLAIYVPRQSTFFITYILTTGWTGFSTEILQLGIFLLNFIKVRET  
DTI---

SLPYRRLPSVLLFILLGLMYAVLAPLLLPFLLIYLVFGYIVYRNQVLFVYEPSYETSGQFWPHVH  
SSVIFALVLMQITFIGVFGVKQKPNASILTIFLPFITLFFDNYCKSRFVPIFANLSMETTMKKKDELL  
QCIQGSYKHP

>Selaginella\_moellendorffii\_D8RE49

---ATLQDLMLSAANGGSTIVFLLVFAFLRLQPFSDRVYYPKWFIK--  
VRKSEDLHFLDWMWESIRMPLELIDHAGLDSAILLRIYLLGLKVFVPLLVLCLILVPVNATDTNL  
RKSADIDKLSVANVQDRSDRLWAHMLLTYVFTLWTCYVLHNEYKTVAFMRLRFLKSQM--  
SRPEQFTVLRQIPDE-

TVGLHVDHFFRVEHYLMYQIVYNANKLAKIVKKIEDIENKLNCRIMESRNPSS-  
RPQIKKRGEKLDAMKFYTSEIERLVGEAATEKERIFEKAKLPVAFVTFDSRWGAAVCAQTQQTK  
DP-

TKWLAEWAPEPRDVYWRNLAIPYMEYFRKIAITAAVVVLILFFMIPVTFVQSLANIEDIERTVKFL  
RPVIERKFIKSILQGFLPGLALKIFLLILPSVLMILSKVEGHLSSKLDRMAAAKHFFYFMVFNVFFA  
SVFTGSALQQLKFLKSPSDIPQLLGDAIPLKATFFISYIMVDGWASVAGEILRLKPLFFHFRNM  
REKAMAPGGLSLNTALPHVGLYFLLGLVYAVIAPIILPFIVTFFGFSYLVYRNQVINVYHPEYESA  
GGFWPHIHNRVVASMIIMQLTLLGLLSTKRAASSTPFLAGLPVLTFFHTYTKRCFESAFVKFPLE  
EARAKHTDFRSLFRNSYTHP

>Selaginella\_moellendorffii\_D8RRD4

---ATLQDLGVAAAINISAFIFLLVFAFLKLQPANARVYYPKWYLKG--  
VRQGSLLHFLDWMRDALRMPEGELIAHAGLDSVYLRILYLLGLKVFVPLMLLGLVLPVNVTD  
SNIQ-GTDIDKISLTNIREKSPRLWAHVVMYVFTAWTCFMLFTEYKTVARMRFQFLAAEA--  
RRPDQFTVLRQVPLE-

PISTHIDHFFRVDYLLCNQVIYNANKLAKLVKKREGLQNWLDYYQLQFQRKNT-  
RPMTKTWGQKVDAIQYYTDGINQISKEAAAERERVLDSSKLPVAFVSFRSRWGAAVCAQTQQT  
RDP-

TWVLTEWAPEPRDVYWRNLSVPYLQLTMRKLFITGAVFLLIFFYIIPVTFVQSLANLEGIEKKLTF  
LRPIIEAKFIKSFLQGFLPGLALKFLHFLPKLLMFMSKIEGHLALSQLEVSTSAKYFFYFMVNVVFF  
ASVIAGAAFEQLKTFQSPSQIPVILAGSIPQKATFFITYIMVDGWASIAADIMRIKPLIVYHLKNMR  
ENAMSPGSAGFDTVFPQLELYFLLGTVYSIITPFILPFIIVYLAFAVYVYRHQVINVDPEYESAAA  
FWPHIHNRIVSLLVEQITLFGVFAGKRAAASSTPLLIGLPIMTIVFHYYCKNRFEPAFRKYPLEEAM  
SKNWNIKTYLQNSYMHP

>Selaginella\_moellendorffii\_D8S958

QQDAWYGNIQYLSNISIIGAVCCVILFLVVKVRS DHKL-----  
ASLVTKLLAVWHTTSQQIARLCGANSAYLWVEGYTFVTLAIVSVVALLVILPVNLYGGTV--  
EDQFAKATVAHVKEGSPWLWAHTVFMVALTAAVHLCTSSLEKHLQATQFHD-----  
SADSVAIFTLMVRGVPRVLAMDKRELDYFEHGKVVYSIVVPHDLDAFYRLKSELLKTRERIVAAEA  
QARARQQ-----EDRLRRLAARREELESSLGAYRDG--

MAAGAGIAFVVKDVFTASRALQDARNMSQLSCWKVGRAPPPRDIYWHHLGRSSLQRRRLRTV  
AVNLLLLLVFFCSSLAAITAIHNASRFIHLQVWLAWARSS-  
WFSTFILQFLPNVLIQVTVLPAVLAHLSKFESHLLTVSGEQQAVLVKTVCFLLVNLILLKALVETT  
LEAAGCYIDKDS-

IQLMSATFLATSCLSALAFMITSSFLGVSFDLLAPIWIKRKFMMRVKDRWGIQRFDHAQYYAFN  
LTIFALVIVYSTFAPVMIPFGALYFGYRYMVDKYNFLFVYRVRGANDGKLMGTVLRVMRLSLCLY  
LVAMLLFFYVRGDGERLQVLTTLALLMVCAKLVKDGFDLSVQGLRTDEAEGA-----

EVEYEV LARP

>Selaginella\_moellendorffii\_D8SKT7

---QLGGLVASAGINIGLAVIFYSLSYIFRKQRTNVNVYFPRYVLR-----  
VPSAGWIQRALQPSEDEIIASCGLDAAVLLRIFIFSMRFFAICTLIGVGILAPLNYTDNQVSHFDSL  
DLFTISNISNGSNRLWIHLAALYVISFSAYWLLHMEYKHVTQKRLEVLSTAR--  
PQPDQYTVLVR SIPREESYSASIDRFFSQHTYLSHQMVIRDWRVVRKKQTLESVKEIERLKQIA  
PHE----  
RPTCRDFGSKVDQLEFKSRKFEELFDEFREGQRELQGEAELPSAFVSFKSRWGAAMAAQTQQ  
AENP-  
MAWVTDWAPEPRDVYWPNL SIPLLLSKLYAVGVVAVFAIILTFVIPVGLVQTIAQLENLRKWFP  
AIKIVLKIPGIKSVITGYLPSVLLSLLLYIVPSLMLFLSKVEGHVSRSTQEREAARKVFFFLVGNVFF  
ISSLSGSLIDQLYAGFSEPKNIPNQLAIYVPRQSTFFITYILTTGWTGFSTEILQLGIFLLNFIKVRET  
DAI---  
SLPYRALPSVQLFILLGLMYAVLAPLLL PFLLIYLVFGYIVYRNQVLFVYEPSYETSGQFWPHVH  
SSVIFALVLMQITFIGVFGVKQKPNASILTIFLPFITLFFDNYCKSRFVPIFANLSMETTMKKKDELL  
QCIQGSYKHP  
>Selaginella\_moellendorffii\_XP\_002990725  
-----RRPKNYPVYYPAVLIRE-----  
RTPFQWLSEAWRVTESEIVSFAGLDAAYIHLDDAALKILSIAALFCLPVLVVAALSDDYARFSGL  
DKLAMGNIPERNSKIWLFAIGAYWLSAAVYIVLWTKYRRISKLRKSVLSSG---  
ARPEQFAALVRDIPRSHRDTAQIDAFFRRDSYERCIPVGD LGGASKTWKAMESTKAKLDRAQA  
GVTS---SNRPHHKT LGPSVDSVDFYKEKLEASERHKSSKTAAPP--  
GRAAILVFNNPAAAAACGQCVYASSA-  
GRWVTS PAPEPRQMIWGNVKIPWYQRYIRQAIVYTLVALTILFFMIPIGFVSAFSTLDKLEKLVFP  
VKNIEKIKVLSTVLQAYLPQLALIVFLALLPTLLLFLSRMEGIVSQSHVERAAAGKYFYFNFNVFL  
GITITSSLFDTVKKIQKEPNSTVSLGAAIPPAASFFITFIALRFFVGYGLQLSRLVPLIIFRIKKKIRA  
AWAPKDFS YATRVPGDMLILTIALCYAVIAPMVL PFALVYFAFAWIIARHEALKVVVPAYESYGR  
MWPHIHTRIIAALLVSQLAM LGYFSIKKFVFS-PILVPLPIATLLFALITNKIYYPTFKNPPELVT-----  
-----  
>Sorghum\_bicolor\_C5WQN2  
---ATLQDLGVS AFINILSAFVFLLLFAVLRIQPVNDRVYFPKLYLAQ--  
KRQHDHITFLSWVPGALRMSETELVAHAGLDSAVYLRIYKLGKIFLPIATLALLVLIPVNVSGGT  
LLDFSDIDKLSISNVNPGSNRFFIHLLMAYVFTFWACFMLYKEYSNVAFMRLHFLASQK--  
RCADHFTVIVRNIPRH-  
STSETVDEFFRRDHYLGQQPVYANRYAKLVKQRERLQNWLDYYELKFERHPER-  
RPTGRTCGREVDQIDYRARISELEKRMASERQKVLPAKAMPVSVFVTFDSRWGAAVCAQTQQ  
SKNP-  
TQWLTDWAPEPRDVYWQNLAIPFFSLSIRRF LISVAVFALVFFYMIPIAFVQSLANLEGLEKVAPF  
LKPVIEVKVVKSF LQGFLPGLALKIFLYVLPTVLLIMSKVEGYVSLSSLERRTASKYFFMLVNVF  
LGSIIAGTAFEQLHSFLEPPTQIPRTIGVAIPMKATFFMTYIMVDGWAGIANEILRVKALVIYHLKN  
MRERAMDPGSIRLGENLPSLQLYFLLGLVYAVVTPLLLPIIVFFAFAFLVYRHQIINVYNQEYES  
AAAFWPQVHTRIIASLLISHVTLFGLMSTKKAAYSTPLLIFLPLLTWIFHKYCKSRFEPAFRKYPLE  
EAMAKNLNLKSFLANAYLHP  
>Sorghum\_bicolor\_C5X9J3  
----DLASFITSVLTSFVIFVALVLVFTWLSRRPGNAPVYYPNLLLRG-----  
RSPVGWIRD AISASEPDVVAAGGVDAAYLVFLSSVLSILVYSGIVLLPVLLPVAATGGALVGFS  
AIERLGVGNVPEGSMLRWAFLLSVYWVSFVTYFVLWKS YKHVSNLRATARSTPD--  
VKPEEFAVLVRDIPRDET IKDFVDSYFRANTFYRSMVVDHTKADKIYQEIEGHKQKIARAEAIYA  
NSKTGTKPTHRTIGKKVDTIEYCSEIQIKELLPKLEAEQKTTLKQ--  
QRAAIVIFNSR SAAASASQTLHAQVY-  
DKWTVMEAPEPCQILWPNLPRNLYERQIRQSVVYAI VFLVVVFYMPVIAAISAVTTLENLEK KLP  
FLKVVVEKPAIKTVLEAYLPQIVLIVFLALLPTLLMFLSKQEGIPSQSHAVRAASGKYFYFIVFNV  
LGYTLGSTL FKSLLTIIDHPAGIVTMLANSLPGSATFFLTFVALKFFVGYGLELSRLVPLIIFHLKRR

VKAAWAPGDLGYNTRVPNDMLIATVVLCSVIAPLIIPFGVAYFALGWLIAKNQILRVYVPSYESY  
GRMWPMMHTRIITMVMYQTTMIGFIPLKKFYV-  
PVLVPLLPIIIFAYVCHMRFPYPAFAKTPLEVVAQH-----TIYTSYIPP  
>Sorghum\_bicolor\_C5XHW4  
----DAEGLLASAAINLGLALVALSLFSLKQPGNAPVYRPRRMT-----  
TPSFRWICAAFRLSEEDVLRHGLDALVVVRLFKFGIKCFVCSIVGLLILAPTNYTSEGRADSN  
SMELFTVTNVTRGSNRLWVHFSCLCFISFYVIYLLHKEYREITMRRIEHLKHHY--  
KRHDQYITLVRGIPHTGTYGCVVDHFFSKQTYQSYQIVHDIGNIEALQKLASSIQKRIQRK-----  
--RETRKCFTSEATNIHNHEKLNKQETIRLLQCENLQK-  
EVPVAFVVSFKSRLDAAQAEMQQLVNP-  
LSLVTTYAPEPADIIWKNLSIPFWRMGMYKIGVFVAAFLTVFFTIPVTAVQGIVQFEKIKRWFPF  
ARAVQLIPGLNSVVTGYLPSMILNGFIYLVPFAMLGMAFEGCIANSQKEIKACNMIFYFLLGNVF  
FLSILSGSLLDQIGESFEHPKNIPNRLASAVSAQSDFMTYILTNGMSGFSLEVLQLGLLIWQFLK  
AHEPYLY--  
GFPYFRVPIVSLAILIGVVYAVVAPLLLLPILLIYFLLGYAVYINQMEDVYEITYDTCGQYWPNIHHY  
IFLSVTLMQITMIGLFLGKSKPGASFATIPLLVLNILFNEYCKVRFLPNFVSHRPVQVAKQSTEGDV  
NDAICAYWPP  
>Sorghum\_bicolor\_C5XMV4  
---ATIQDIGLSAAILGAVVFLLAFAFLRLQPINDRVYFPPKWYLKG--  
ARESPSLKFLSWMPAALKMPEDELISHSGLDSAVYLRIYLVGLKIFAPISVLAFIVLVPVNWNTNDT  
LQ-HSNIDKLSISNIPVGSKRFAHLAMAYVFTFWTCYVLLREYGIVAKMRLRFLSSEK--  
RRPDQFTVLVRNIPPE-  
SISELVEHFFLVLDHYLTHQVVYNANKLAKLVKEKANMQNWLDYYQLKFERNASK-  
RPTTKTFGTVDAIQYYTSEIERIENEEAEEREKIVPKSVVPAFVSFRSRWGAAVCAQTQQTS  
NP-  
TWWLTEWAPEPRDVYWDNLSIPFVSLTVRRLIVAVAFFLNFYVIPIAFVQSLANIEGIEKAAPFL  
KPLIEEPTIKSFIQGFPLGIALKIFLILLPSILMFMSKVEGLTSISSLERRSASKYYIFIFNVFLASIIA  
GSALEQLKSYIQSANEIPRTIGEAIMKATFFITYTMVDGWAGVAGEILRLKPLVIFHLKNFREEA  
MDPGSIGFDSSEPQIQLYFLLGLVYAAVTPFLLPFVLIFFGFAYVVYRHQIINVYNQEYESAAAFW  
PSVHGRIITALIVSQFLLGLLSTKGAGQSTPVLLVLPVVTFFYFHKYCKNRYEPTFVKCPLQEAM  
KKGFDLKGYLMNAYIHP  
>Sorghum\_bicolor\_C5YSZ5  
----KISALLTSAGINIGLCVFLSLYSVLRKQPANVRVYFGRRIAE-E-HDR--  
VPSTGWIVKALQCTEEEEILAAAGLDAVVFNRLVFSMRIFSLAAVLCVFGILPLNYFGQDI--  
SESLDIFTIGNVEVKSRLWVHCVTLYIISGVACILLYIEYKHARLRLHLSAT--  
PKPSHFTVLVRGIPKE-  
SCSDVVDGFFTKSSYLHQQVYKVGKVQKIMTGAKKAYKKFKHFTDETVDQ----  
GCRTITCGASSNSFKLLNTECEQNRGKAD-NKSILDDE-  
ECTAAFVFFKTRYAALVASEILQTSNP-  
MKWVANLAPEPEDVYWSNLWLPYQLWARRIATLLGSICFMFIFLIPVTFIQGLSQLEQLQQRL  
PFLRGILKKKYMTQLVTGYLPSVILQIFLYTVAPIMMLFSTLEGPTSHSERKRSACCKVLIFTVWNI  
FFANVLSGTVISQLNVLS-  
SPKDIPVELAKAVPGQATFFITYVLTSGWASLSSEVMQLFGLIWNFIRKYTEFVP---  
SFPYHTEVPKVLFGLLGFTLSVLAPLILPFLLYVFCVLYVYRNQLLNRYRTRYDTGGLYWPIA  
CNTVIFSLVLTQIICLVFGLKESPVAAGFTIPLIILTLFNQYCRNRLPLFKTFPAQDLIDMIDEIH  
HGLHSAYCQF  
>Sorghum\_bicolor\_C5YX25  
---ASLSDIGVAAGFNVLTAVAFLLAFAFLRLQPINDRVYFPPKWYLKG--  
MRDNPILKFLNWMPAALKMPQDELINHAGLDSVYLRITGLKIFVPITVLAFLVLPVNWNTSDT  
LG-YSPIDKLSISNPNVNGSKRFAHLSMAYVITFWTCYVLFKEYEISNMRLRFLASEK--  
RRPDQFTVLVRNIPPE-

SISELVEHFFLVDHYLRHQVVYNANKLADLVEKKKKMQNWLDYYRLKYERNPSE-  
 RPTTKTFGSKVDAIDYYKSEIEKIGKEEAERKKVMPKSVVPAAFVSFRSRWGAAVCAQTQQT  
 SNP-  
 TVWLTEWAPEPRDVYWNLSIPFVSLTVRRLIAVAFFFLNFFYIIPITLVQSLANLEGIEKALPFLK  
 PLIELPFIKSFIQGFLPGIALKIFLIVLPTILMFMSKFEGLISQSSLERRSASKYYIFLFFNVFLT  
 SVIA  
 GSALEQLKTYLTSANDIPRIIGDSIPMKATFFITYVMVDGWTGIAGEILRLKPLIFFHLKNLREEAM  
 DPGSICFDSTEPRIQLYFLLGLVYAAVTPFLLPFILVFFGFAYVFRHQIINVYNQQYESAAQFWP  
 SVHGRITLIVSQQLLLGLMSTNDFEQSTPVLLVLPVLTFWFYKYCKNRFEPAFVRNPLQEAMK  
 KNFDLKAYLANSYLHP  
 >Sorghum\_bicolor\_C5YY97  
 ---GSLTDIGVSAGLNILSAVGFLLAFAVLRIQPINDRVYFVKWYLKG--  
 TRSSPRIRFLNWMPAALKMPEPELIEHAGLDSAVYVRIYLLGLKIFVPIALLAFSVLVPVNWTS  
 G  
 LENYDEIDKLSISNLGKSGKRFWAHIAMSYVFTFWTFFVLYHEYKVVTMRLRFLANQN--  
 RRPDQYTVLVRNPPE-  
 SVSEHVEHFFAVDHYLSHQIVYNANHLVETKGLQNWLIYYENKHAKNPAK-  
 RPKIKTWGQRVDAIEYYQKEIENLCKQEDEERQKVIPNYIMPAAVFSFKTQWGAAVCAQTQQT  
 SNP-  
 TVWLTDWAPEPRDVFWANLAIPFVELSVRRLTVAVAFFFLTFFMIPAIQVQSLANVDDLEKVL  
 PF  
 LKPIIERNLQAVIQGFLPGIVLKIFLILLPTILMAMSKIEGHTSLSGLDRRTAMKYYIFL  
 FNVNVLFGS  
 VITGTAFQQLDNFIQSANKIPEVIGESIPMKATFFMTYIMVDGWSGIAAEVLRKPLVIF  
 HIKNARE  
 QAMDPGSLDFYNSEPRQLYFLLGLVYAVVTPMLLPFIIVFFSLAYLVFRHQIINVYSQRY  
 ESGA  
 QFWPDVHMRLIALIVSQILLGLLSTQEAEKSTVALLPLVLSIWFHHVCKGRFEPAFV  
 KFPLQD  
 AMVKTNLREYLKAYVHP  
 >Sorghum\_bicolor\_Q1KSB7  
 DPEAWYGSIQYLINISAVGAASCVLLFLLVKLRFDHRR-----  
 SALAAKLLAVYHATAAQIALHCGADAAQFLFERASFLILAAVAAAATAALPLNLLAGDA--  
 VDQFAATTISHIPKSSPLLWLHLLTAAVVAIAHLGISRMEDALRITRFRD-----  
 NSSSVAVFTIMIQQIPKTLAADKTLKDYFDHGKVVYRAIVPFDLCTLEYLVDQLGKVRN  
 KISWLEA  
 RLGARDL-----EERLRKLQTKKLVLASRLSDYKEG--  
 RAPGAGVAVFVKDVTANKAVRDFKEPVQLERWKVERAPPASDIYWNHLGLSKISSRLR  
 RIA  
 VNTCLILMLFFSSPLAIIISGMQNAARIIHAKSWLARLEGS-  
 WFWTIIFQFLPNVLFVSYIIIPSVLSYFSKFECHLTVSGEQRAALLKMVCFFLVNLLR  
 ALVSSL  
 ESWGICYLDGDQ-  
 IRYLSPSFLSRSSLSLAFLITCTFLGISFDLLAPIPWIKHIMKKFNRSHPKQKFDFAQY  
 YAFDITI  
 FALTMISLAFPLVVPVGGATYFGYRYLVDKYNFLVYRVRGGNDGKLMDRVLCIMQFCV  
 IFFLAA  
 MLLFFAVQGDMSMKLQAICTLGMVLFY--KLLSDRFQPSLEGMQTNFSF-----VDGPT  
 DYEVSQP  
 >Sus\_scrofa\_F1RQV6  
 LQGLPFGGVPTVLALDFMCFLLFLSILRKYAWDYG----RLLDADTS-  
 VSSSVNGFCSWLTAIFRIKDEIRDKCGGDAVHYLSFQRHIIIGLLVVVGVLSVGIVLPV  
 NFSGDLL  
 --AYSFGRTTIANLKSGNLLWLHTSFAFLYLLLVYSMRRTSKMRY-----  
 KEDDLVKRTLFIGISKYAES-  
 EKIKKHFEECTVLEARPCYNVARLMFLDAERKKAERGKLYFTNLQSKDNVNPCKPG-H--  
 EQVEAIEYYTKLEQKLEKEDYKREKEKV-  
 NEKPLGMAFVTFHNETITAILKDFNVSSSLHNWTVSYAPDPQNIYWEHLSIRGFIWWLR  
 CLVIN  
 VVLFILLFFLTPAIIITMDKFNVT-----  
 KLNNPIITQFFPTLLLWCFSAALLPTIVYYSAFFEAHWTRSGENRTTMHKCYTFLIFM  
 VLLLPSLGL  
 SSLDLFFRWLEA---  
 AIRFECVFLPDNGAFFVNYVIASAFIGNAMDLLRIPGLLMYIRLCRNVRHQAYEFQFGA  
 AYAW  
 MMCVFTVVMYTSITCPIIVPFGMLYMLLKHLVDRYNLYYAYLPA-  
 KLDKkihsgavnqvvaapilclfwllffstmrtgflaptsmftfvvlvitiviclchvcfgh  
 fkyL  
 SANYK---S---SGDEPPS---

>Sus\_scrofa\_F1S8R3  
 LQGVTFGGIPTVLFIDVTCFLFLILVFSIIRRRFWDYG----RILEADSS-  
 SSSGQLGCCPWLTAFRLQDDQILEWCGEDAIHYLSFQRHIIIFLLVVVSALSCLCVILPVNLSGNLL-  
 -PFSFGRTTIANLQTDNLLWLHTVFAIYLITVGFMRHHTQSIKY-----  
 KEESLVRRTLFITGLPRNAKK-  
 ETVESHFRDCEVVEVQLCYNVAKLIYLCKERKKTEKSLTYTTLQVKTGQNPCKPCG-Q--  
 EWEDAIAYYTRLKARLMERITEEECRV-  
 QDQPLGLAFVTFQEKSMATYILKDFNASSDLCKWTVTFASYPEDICWKNLSIQGFRWWFQWL  
 GINFTLSVGLFLLTTPSIILSTMDKFNVT-----  
 KLNDPVISQFFPTLLLWSFSALLPTVVYYSTLLESHWTKSGENRIMMTKVYIFLIFMVLILPSLGLT  
 SLDFFFRWLEA---  
 SIRLECVFLPDQGAFFVNYVIASAFIGNGMELLRLPGLILYTFRMGRNIQNQAFEFEGAMYAW  
 MLCVFTVIMAYSITCPIIAPFGLIYILLKHMVDRHNLYFVYLP-  
 KLEKRIHFAAVNQALAAPILCLFWLYFFSFLRLGLKAPLTLFTFLVLLTILVCLAYTCFGCFKHL  
 PNYK-----QQQTY---  
 >Tetraodon\_nigroviridis\_Q4RQ32  
 LQGLPFGGVPTVLALDFMCFVLVLLVFSFLRKAWDYDYG----RLLDADTS-  
 VSSSVTGFCSWLTAIFRIKEDEIREKCGEDAVHYLSFQRHIIIGLLVVGVLSVGIILPVNFSGNLL--  
 AYSFGRTTIANLDTDNALLWLHTTFAFLYLLLVYSMRRHTSKMHY-----  
 KEDDLVKRTLFVNEISKYAAE-  
 SELKQHFENCVVLEARICYNVAKLMCLNSERKKAERSKFFIDLLTKEQVNPCKPCG-H--  
 EEEEAVSYTKLEAKLKDEYRKEKEKV-  
 NKKPLGMAFVTFQNEAMTAMILKDFNASQKLQNWVSYSAPDPQNVYWEHLSVGGFSWWVRC  
 LIINIILFLLFLLTTPAIISTMDKFNVT-----  
 KLNNPIITQFFPTLLLWSFSALLPTIVYYSAFFEAHWTRSIGNRRTTMHKCYTFLIFMVLLLPSLGLS  
 SLDLFFRWLDV---  
 KVRFEVFLPDNGAFFVNYVIASAFIGNANDLLRIPGLLMMYIRLCKNVRHQAYEFQFGAAYAW  
 MMCVFTVVMYTSITCPIIVPFGLMYMLLKHLADRYNMYAYLPT-  
 KLDKKIHSGAVNQVVAAPILCLFWLLFFSTLRSGFSAATSMFTFIVLIITIIICLSHVCFGHFKYLSA  
 NYK-----SGEDDGQ---  
 >Tribolium\_castaneum\_D6W8C0  
 VISNVYEGIPETILLNVITWILLILFAILRNRAWDYDYG----RLLTE-----  
 DAGCLWFPSIFKISRERIFTRCGPDASHYLSFQEQLLFLSTTITVFALCVILPINFQGTQ--  
 KTTFGHTTSLNLEPSSYWLWVHVVASFCFVPLTVLIMRKSSGRIPS-----  
 ASALTSRTVMITHISHAHRNIDDIKNYFTVTEIKDIQIAYRIKKTILEKQRALTHEAKMYCILNNKP  
 DLK-VQPYG----KTQNALEYTTEEARLTDLVVAERRKV-LESPLGIAFITLNSEERAHHVIKSFT---  
 PGSHWLITKAPSPDINWENLEISYRNWYSKAILINAILFLVLFLLTTPVIVVNVFNNTSA-----  
 --  
 QKLTPLLSDFLPTLLLLSVSALMPVLVAYSDEWMSHWTKSKQNHATMHKAFFLLFMVLILPSL  
 GLTSAQAFVEWSNL---  
 TVRWEVFLADKGAFFINYVITSALIGTALELLRFPELAMAFRLLTSIKEIMSEFPFGIHYAWTLLI  
 FTISTVYSLTCPLITPFGLLYLCLKHFVDKYNIIYYVRPITGEGQIHADAVRMVRVAILLLQLIMA  
 AFSFIRGGFNIMCA-VSFIAFIVTVTFFF-----FLSPPSC-----VSSPSSY---  
 >Ustilago\_maydis\_XP\_758658.1  
 NSGASTSTVISAIVLNAVIFAILFTVFLA--RPRFKRVYAPRTY--LP-  
 EEQIEPQSLFGWLPVWLKTPSTILEKNGLDAYMFVEYLEMMLWIFIFIPLLSWIVLMPVYGAGT  
 NG-I-  
 DGFNRFILSRVPQQQKRYIAPLLIQWIFTFWLMWNIRSRVAKFIKLRQDFLVSPQHAASVQARTV  
 LITGIPNELLSEKLRALYSQGGVAKVWLNRLKDLPLDFDEREKWCNKLEAAETSLIKTAYKKR  
 PTHKLMGEKVDTIHWCREEIIARLNKEIQTKRSEYKNYPAQSSAFILFNTQIAAHMAVKTQAHHQ  
 P-



YRMTNRVEAHPDDVVWANMNMNPNYERKIRTVVGWAITIGLIIFWAIPVAFVGIISNVKGLADNVP  
FLGWLNDIPVVVGIQGILPTVLLAVLNMLLPFLRLLSRLSGTPTRSAIELDLQGRFAAFQIVQNFL  
FLTLVSGNAGQIQRVASQPTQFPGLLAEAIKPGSLFFLSFIALQGLSQAAGLFAQIAPLIVYYVKK  
FWWHDHDTSGPAWGTLFPSMTLITVIGTGYVVIAPILNGFVAFTFFLFFLGYKYLFLYVYTPSSET  
SGLFFGKAIRHIFAGLYVEMMLTAIFFLAQAIPEGAFMVVLIVIVVAFHYFLNDSFKALETALPLT  
LVAGNE-----SAFYHP

>Ustilago\_maydis\_XP\_758942.1

QINSNFQGLVSTCVIFAVVGSISAITYESLRQLRRTCEFYLRSRVH-----  
ASTSPRWPFVAVVWKLAI SFTDEWYADHTGMDTVVYRFLRACLFWVLLHCFTTAPILLSIHITFS  
RGTS-  
TDMQRASLSYLEKGSLLWVHLVLLWYISITWVLALWWIGKGS LTLRKAQIAKTNNSDGWRQR  
SLMVMNLPATMRDEASIRRYFEESPIQTVVLRKMNELASMLSRRQEVLTQLEAAHVKLAQEV  
DHRPSSRTRGQTVPTIDYLLTKLNLLTALVTEMRSR--SYEPTSTAFVTFRDPRQARMVWRELK-  
----DVVKVRLAPEVKDLDWDRKTSFTVDVVRGFGVSIVTWGFTIFWVIIIAIVLGIFSVDKL-  
KQIPGLNFFDNN-

KLTGFVTITLPLLVS LASMSVPELIFQVSKAQGFVTF SALYDMCLARYWKVICNVVIFFSVSGT  
VIVTVLTKVNGTGSILSTVASAFP SAAPFFVSYLILQLALQSGFEHMGFMIALQLH LGARRAIKTL  
PRNFNRYYYWLPLHINIMAIVFIFALLNPLVIPFALVYLALALVIFKKNFAYHYRRFEMEGVYFTRL  
LRYSLDAIVVMQAVLLIFFSLKKYIGMSAVLIPLTVITKLIA---TRLWKSQC-----  
RALDEETSSTQPEGATS-TDP

>Ustilago\_maydis\_XP\_759473.1

QRAFEGPWFSQQLSLSIFIGLASFFIFVFVRRR--NAALFAPRTLFSF-----  
VGYFGWIMPTLKTEEMRILQTVGMDAAILLSFLKMGFWLFFSLSCWSILV LMPVNYWQNGVLD  
EEPLPQLPLPA-KPAQAQLYTHLLSTYLFTILAMRAIWINYQRFVRSRQLYLEIV---  
ESIPARTVEIRDLP AHLRDEKALAEYFENMPVESTAVVRNTEGLSRL LKLSNALQQLEKIWVR  
WLGNPHTHRPTMR-FSEKVD AIDELTRQFHAVDRAVRRRRKTG-  
RFPGGNVGFVTFQSAASAQIASQTVHYPMP-  
AYCATSMAQEPRDIIWSNIDLSNDRRVRQVLVSIFMVAVLVFIYIPPLVFLASFVSPGAIKKYAP  
WLDRLDTRLRALVQNNLPSLVVIGFNALLPLVLEYSSYLQGLKARSLVEYSL LKYYLFLMVS  
VVFIFLIATTAWGVLQELAE NPMRVIDKLAASLPKARFFSLSYVILQGIALQPLQLLQPLTLILRAFY  
RVFAELNAPPTLAMGNVYPQALLIFTLCILYSIVSPLIVIFGTVYFGIAYVNKYKLLYVFKPYES  
QGQAWPISASRCI WALVLFHIFQFSLFSVRKELWMSTGLLPLIVFTFWFNHLETTFGPLTEHV  
NLSSVVEV-----NTGRRRYGHP

>Ustilago\_maydis\_XP\_760031.1

GSTD L-KKVAITIVAFVALSLFTLIAFQIL--RPN NKIVYAPKYY---  
EEGKAPPKEGFFGWIPPILKYKEHDLLPLIGLDGVTFLRFVRMMRWMLTTLALLMSV LMPVDIA  
YNVRN-TNRLN YLNMSNVHG-T-  
YMWAVHVGMSYVGTIVALSF IYHYREMVR LRWSYFRSEEYQTSFHARTL MITDVTKRYQADN  
ALGAVLSEYPTTEVHIGRRVGLLPDLIEKHS DLVRELEHVLAKYLKNPN SKRPTKTIGGEKLDAID  
YLTEQINRVEAAVMHQRETI-QQKPEMYGFASLA AVPYAHAAAKVLQNKKP-  
RGMRLTAPPPTGIWQNLVKS RASRAKSSFFGFLMLLV LFFMNIFPLIIVSLLSNMA--  
RISWLRWKDWQTASFTFAAVSGLGAPIIMGIASFFFPIAMRKIAKYRGVQTRYRLDRLLVGQYF  
GFLVISQFLFFSLIGV VLSLVSQLVVEINHAAYATKQQYLNQSNYWL TWLPLRGY-  
LAVFDLAQVIKLLLWVIQKV VREYTKPPVFDYWIYYSN FLFMSAVAMIYAPLAPLVVVFSAIVFWA  
SSFIYKYQLMYV FVTKHETGGMLWRPTINRLLICIGFMQVILILAVVLD TNYYQAIAALPPILMLIAF  
KIYCRRTFDSRFDWYIPNEAE--DA-RHNRLQRRFGHP

>Vitis\_vinifera\_D7SYN5

---ATLEDIGVSASINILSAFALLAFALLRIQPINDRVYFPK WYICG--  
GRASPRLTFLNWMPQALRMSEAEIIQHAGLDSAVFLRIYTLGLKIFLPVTVLALLILVPVNVSSGT  
LFFVSDIDKLSISNVRPESTRFFFHIGMEYLF TMWICYMLYKEYHNVALMRLHFLASQH--  
RRVEQFTVVVRNVP HH-

SISDVTDFHFFQTNHYIDHQAVYNANKYSKLVKRERVRNWLDYNKLFERHPDR-  
RPTTKICGKRVDSEIYYEQQIKEIDKRIALERQRILPKSIMPVAFVFSNSRWGAAVCAQTQQSRN  
P-  
TLWLTNWAPEPRDVYWQNLAIPIFVLSIRKLVSLTVFALVFFYMIPIAFVQSLANLEGLERVAPF  
LRAVELKFIKSFLQGFLPGLALKIFLYILPTVMMILSKIEGYIALSTLERRSSAKYFFMLVNVFLG  
SIVTGTAFEQLHSFLQSPTQIPRTIGVSIPMKATFFITYIMVDGWAGIASEILRLKPLVIFHLKNMRE  
HAMNPGSVDFPETIPSLQLYFLLGIVYAVVTPILLPFILVFFAFAYFIYRHQVINVYNQQYESGAAF  
WPHVHSRIIASLLISQLLLMGLLSTKKAANSTPLLIALPILTTLTFHKYCKNRFEPAFRKYPLEEAMA  
KNLNIKAYLADAYLHP  
>Vitis\_vinifera\_D7TEB7  
---ATLYDIAVAAAINILTAFAFFIAFAILRIQPCNDRVYFVKWYLKG--  
LRNSPLLRLFNWMLAALQMPEPELIDHAGLDSAVYLRIYWTGLKIFVPIALLAFSIMVPVNWNSNG  
TLE-YSNIDKLSISNVPTGSPRFWTHLVMAYVFSFWTCYVLKKEYEIVATMRLHFLASER--  
RRPDQFTVIVRNPSE-  
SVLELVEHFFLVNHFLGFQAVYDANKLFLVDEKMMHNWLDYYQLKYVRDPSK-  
RPTLKTGLNRVDAIDFYTSNIERLAKEISVEREVIATKYVMPAAFVFSKTRWAAAVCAQTQQTRN  
P-  
TIWLTEWAPEPRDVYWENLAIPYVALAVRKLISGVAFFFLTFFFMIPIALVQSLANIEGIEKAVPFL  
KPLIETHFIKSIQGFPLGIALKIFLIFLPSILMLMSKFEFGFISRSALERRSARFYIFQFINVFLGSIIT  
GTAFQQLNSFIQSANDIPKIIGTSIPMKATFFITYIMVDGWAGVSGEILRLKPMIHYHLKNFREEAM  
DPGSLSFNTGEPQIQLYFLLGLVYAVVTPILLPFIIFFGLAYVFRHQIINVYNQYYESAAAFWPD  
VHMRIIVALVVSQLLLMLLSTKQAAQSTPLLIALPVLTIWFHFFCKGRYEPAFVRYPLQEAMMK  
NLNLKGYLREAYFHP  
>Vitis\_vinifera\_D7TPC6  
---ATLQDISVAATINILSALAFLVAFAILRLQPFNDRVYFVKWYLKG--  
IRGSPRLRFLNWMPVALKMPEPELIDHAGLDSAVFIRIYLLGLKIFVPLAVLAFVLPVNWWTGKS  
LQNFSDIDKLSISNVPTGSNRFWAHIVMQYVFSFWTCYVLYKEYKIIATMRLHFIASEN--  
RRPDQFTVIVRNPPE-  
SVSEHIEHFFCVDYYLTHRVVYNANKLAKLVEEKSLQNWLTYYQNKYERNPEK-  
KPTTKTWGTVDAVDHYAAKMEKLCEAVTEERERVIPKAIMPAFVFSKTRWGAAVCAQTQQ  
SRNP-  
TIWLTEWAPEPRDIYWDNLAIPYVELTIRLLMAVAVFFLTFFFMIPIAFVQSIANIDGIEKVLPLFK  
SLMEMNVIKSFQGFPLGIALKIFLILLPTILTIMSKIEGLISLSSLEQRTAGKYFLFVNVFLGSIITG  
TAFQQLHKFIQSPTTEIPKTGVVSIPMKATFFITYIMVDGWAGVAAEILRLVPLIMFHLKNAREQAM  
DPGCLNFSISEPRIQLYFLLGLVYAAVTPILLPFIIFFSFAYMVFRHQIINVYDQKYESGAAFWPSV  
HQRVHGLMISQLLLMLLNTKDFSKSTPFLIVLPVLTFFWFHRCNRFESAFVRFPLQEAMVKN  
LNLKNYLQDAYIHP  
>Vitis\_vinifera\_E0CNX2  
----KLYALLTSAGINIAFCAILLSLYSILRKQPSNVSVYFGRRLAQ-F-SPK---  
VPSPGWMVKAWETSEEEILSVGGMDAVVFLRIVVFSIRIFAIAAIIICIFLVLPVNYGQAV--  
SESLDVFTIGNIKEGSKWLWVHCFALYVISCACVLLYFEYKSITNMRLAHITGSP--  
PNPSHFVLRVRSIPWQ-SYSDLVKQFFINSSYLSHQMVSDSWTVHKLVTDAYKMLQTSS-----  
MKQ----SSTPSLCGVSPNSFKILSND--PVKDKVDLDSTT-VSH-  
EGASAFVFFKTRYAAVVASQVLQSSNP-  
MLWVTDLAPEPHDVYWSNLCIPYKQLWIRRITLLAAIVFMFLFLLPVTFVQGLTQLEQLQQTFF  
FLRGILKKTIVSQVVTGYLPSVILILFLYTPPTMMLFSAVEGSISRSRGRKKSACCKILYFTIWNV  
FVNVFSGSLISQWSVFS-  
SVKDLPTELARAVPTQASFFMTYVLTSGWASMSFEVVQVFALLCNYFTRFSNETL---  
SFPYHTEIPKALLFLLGFTCSILAPLILPILLVYFFLAYLVYRNQIINVYISKYESGGKFWPIVHNTT  
IFSLVLAQIIAIGVFLKRSPVPSGFTIPLVIGTLLFNEYCRQRFRPIFENHAATVLIEMMEQIHHQL  
HSAYHQP

>Vitis\_vinifera\_E0CVN9

---ATLQDIALAAAINILSACIFFLAFVLRIQPFNDRVYFPKWYLKG--  
LRSSPTLRFLNWMPDALKMPEPELIEHAGLDSAVYLRIYLIGLKLFPITFLAWAILVPVNWNTNAS  
NTLYSDIDKLSISNTPLGSERFWSHIVMAYAFWTCYLLQKEYEIIASMRLQFLASEK--  
RRPDQFTVLVRNVPPE-  
SVSELVEHFFLVDNYLTHQVVYDANKLAKLVKKKEKMQNWLDYYQIKYSRNESS-  
RPFLKTWGNRVDAMDFYTSEIEKLCKEISVERERVAPKSIMPAAFVFSKTRWGAAVCAQTQQS  
RNP-  
TLWLTEWAPEPRDVYWHNLAIPFVSLTVRRLIIVAFFFLTFFYMIPIAFVQSLASIEGIEKAVPFL  
RPIIEKKFIKSLIQGFLPGIVLKIFLIVLPTILMLMSKFEGFISISSLERRSASRYLNFVNVFLGSIIT  
GSALEQLNTFMQSPNQIPRTIGVAIPMKATFFISYIMVDGWAGIAAEILMLKPLIIFHLKNFREEAM  
DPGSIGFNTGEPRIQLYFLLGLVYAVVTPVLLPFIIVFFCLAYVVFHRHQIINVYNQEYESGAAFWP  
DVHGRIGALIIISQLLLMGLLSTKQAAQSTPFLIALPILTISFHYYCKGRFEPAFIRYPLQEAKMKHL  
NLKGYLQTAYIHP

>Volvox\_carteri\_XP\_002948882.1

PYVVSQTQLKASAILNFILGAVSLLAFISMRTLR---VYQRRLLF----  
LQPPQRQAWSWATSVMCMSDTDIVRTAGFDALLNRTILMGLQIFSVLTVLALGILLPTYYSFDD  
VVTVAELSRTTISNLPPGHAILWLPAAATYLVIAVCCWVLLVHCQSYAELRMAYMLCLAHLVNC  
HHYAVLIRDV--  
PWDDSEEVAAYYTQDSFQRLVPVCSHRAVDELLFQWTAAMGNLARSTAADSSSSL---PSG----  
TATAAIRRAAAVRRLLQDRILLERARA-RSPTRRAYIALFSSQRDAAVAAQCSP-  
LARAQHFRAACAAPPDSDVYWPALWTLPTGRAARLLASPLLAFLV----  
PIGVLTGLANLPVAVLNALWF---  
CNRRLARSLTGLLPALISLGWAWVLPVLYLLSAQSRCVSLPAMDRQMSRWFFWWSLLNMF  
LGAVVGGGMFQQLGAYLQDPGKLLLRIPTASNFFMHYTLTKGLYSNWLRVAWPHGSM  
GAIMRGVFLIHTPPGYRFGAQYRGRHTLMVGLAYVVTAPLIAPIALFFITAYITWRYAIVYIFER  
QYESGGQMFPVVFVSHMTGYLLVGELFTGAVLLTNGGWMQAALLCSLTPAIVAFHRLCVRKRYLR  
PLEHPPLLAM---AAPPASVDSSVYLPP

>Volvox\_carteri\_XP\_002949162.1

KNQVSDTTIITGLWISGVVGTAVIILFCVLQRVSL---LYKYRLAVR----  
VKPPKISFIDWAIKSISVSDVDFILSAGLDALIMVKICALGVQLFLPLCILGTAVLIPLHWTGGASK-  
QSGFMRLTMSNIPHGSKVFWVHLGFVYIYLGWAMVLLHWHYHQYLTIHQHYLRKGDVAVLAQ  
HYAVLVTDVSRELPRYRVSATFLREEFDRAIQVNFKEVDLLLMEVDKHMAYQE--  
AIKYEEKTG--KPLY--VGERCRVRDHHRDKINDLLVQVRKARVAA-  
NKAHTPSWFVFFRTQRAAAMASQCIIH--  
AEDQFRVHPAPGPDEVNWSALWSNFRDRDLRRNLMRPLVVLV---  
AFPIGIFTGVTQLDYLLSQQLWY---  
CGQALLKRLVVAWLPSLLLILWGMVLPFFTFVQSRQARSLSEADRYIAKNMFYFGVFNFLG  
GVAGSTIIQGINSIAIEKPSEIFNLVGTYPVPTSSNFFINVTMFRVFSVPVRMLWPHIGIRMYLIRRR  
AFLMAPVSPRYGFEVGMVMIIFLIAFAFSVSPLLMPMAMLFFAISWLFWRWALLYVYVRKYEG  
GGTMWPFVFNRLVCLAIFPAFTACVFVTKHAYAQAIVLVTPVILVRFHKYCYRFETGLQAM  
PLATV---AAPPARVEPWVYTPP

>Volvox\_carteri\_XP\_002951035.1

-----  
FLLLSVWCLGVVLPVNMMSGKEVSRLSDLDLLSLANISPGSRLMWVHLASVYVVTAVTLWMLWR  
QSREAVLRVLYVTHSA--PGDSSHTVLLRDIPGA-----  
FIVKEMAECRLVALHVVRDESLAGLVQQYSTTKRSLEFYAARLAAGR--VRRRQ-  
WGIRVDELLHLRTRLEVLVEQLRAGLAKV-----DELPRRWDAVVSTALHDRDE-  
ALWRPTPAPHPGELLWGNLRLRLWQISWRVAVARTAFMALLSYTPVSALQGLMQLRRLER-  
LPVVKVIVRLSVVRSLLSGLLPGAVLRLFLMLLPALLSRLVRWAGAISLSEVDFRTTTLAFDFQV  
AVFLASLLAGALLNQITEFVAQPGQVLTVLGTGVPQTASFFIAYILFNGLVVGPLGFLRPFALLTL

ALNRARRARLWEAPEARFAHSVPHHSLMILLGLSYSLVNPLIAPACVVYFAMVGLMERYQHCCY  
WSRPYESGGKMWSQVFRHVMVGLYTFHVVMLALLVIKKFPFAP-  
LVLPAPLGAAAFHRQLHSLYRRPWSNLSLRDAADL-----  
>Volvox\_carteri\_XP\_002955034.1  
-----C-----RYAKD-----  
NGLLSWIYPVITYPEGDIIDEAGLDCAMYLRILRFGVYLFFPLTIFCIIVLPPNMKSNIEAFSDFD  
HYSLSNVEAASPCKMWAHLFAVYCVVLYTLWLLWRFNRESVLLRLLFLGNAK--  
RGGPSHTVLVTDIPGQ----  
LVAREFALSNAVAVNMIQDTSALEPLAEEYNQVCQDLDMAKLRRLKLRKA--LPQKQ-  
MDVKVDAVEFWLERMKYLRERIKIEQAKC-RK-MAPSAFVTFNTRMAQAVSANSLSHSHDE-  
NAWRVQNAAPFEVWVWKNLSLTMPIKNGRLYLLWAAFWMGMIFFMVPVSFIQGMIEVPKLAS-  
IPVLGDIVTTPPIKQLLQAVIPGLVLIKIFLALVPTILRIMAQLSGATSVSEIDFGVVKRFFLFQTVVVF  
FGSILGSFFNQLKQWVKEPSSVIATLGKSIPMTSTFFITYLLVNGLVKSFARLPPNFVYIYWILSK  
RQRMWFMQWTNNGTTVVDHTIAMMLGLTFSCINPIVCPAALAYFLVNFLGETYNNVYVYRRQY  
ESGGMWKTVYNQVMVALYIMQITMLGLLSLKFKFSP-  
FMFPLIIFISITSHISTLQLFNRPWSVTALHDAAYMNSQEKREVEEMYMNP  
>Xenopus\_tropicalis\_A0JP96  
LQGLPFGGIPTVLAINFLAWLVLLLIFSCLRKAAWDYG----RLLDNDC--  
EISPSVGLCSWLSSIQMKDEEIQSKCGSDAITYLSYQRHLLVLLAVCCISVAILPVNFSGDML-  
-PAQFGRTTIVNVPTKDRFLWLHVSFALVYFLSVLCMRHHTSSLHY-----  
KEDDKVARTLMITKIPSEISDASLFTKHFHECTVTDVQFCYDVRHLMKLDKERRRAMKGRMYFA  
GRAQKEGKIHPCAR--QQVEAEQYYGELEERLTDEFTAERNRI-  
TLKRLGAVVTFQDERMTAVIIKDYNRSSLLKWKVHYAPAPSDIWIENLAVSGALWWFRFLAL  
NLLLFLVLLFFLTTPAVIVSTMDRFNVT-----  
YLRNPVITQFLPTFLLWMFVSVCLPFLVYYSAFFECHWTRSSSENQHTMHKCYFFLVFMVIVLPSL  
GLTSLNLFRRWLEA---  
NIKFQCVFLPNNGAFFVNYVITASLIGTAMELLRFPGLTVYAARLCLHVRNQAYEFQFGLEYAWT  
TCVFSVVMAYSITCPVIVPFGLIYMLLKHMTDRYNIYYAYIPT-  
KLSPGLHKAAYQMLAAPVLCIFWLLFFSVLRLGSTHPVTLFTFAVLLFCLLFSTFGLCLKQLP  
NRPSYQ-----SPAHASY---  
>Xenopus\_tropicalis\_NP\_001072343.1  
LQGVTFGGIPTVLVLDVACFMFLLAFAIIRRHFWWDYG----RVL DADS--  
SSSGGNGFCYWMTSTFQMNEDEIYDRCGEDATHYLSFQRHIICLLIASILSVGVILPVNLSGNLL  
--PLSFGRTTIANLQHHRLLWLHTVVAVVYLILTVVFMRHLSAIKY-----  
KEENTVKQTLFITGLPRNVDK-  
ETVRLHFSECQVEEVNLCYDVADLIRLSKERKKAENLAYFTNLLNKTGRNTKPCG-Q--  
EREDAIEYYTRVRDGMEEYARKQEVV-  
CDIPLGIVVTFADKSMSTLILKDFNASAQLGRWGVTYATYPENICWGNLSLQGVKWWARCLGI  
NFCLFIVLFFLTTPSIIISTMDKFNVT-----  
KLNNPVISQFFPTLMLWSFSALLPTIVYYSTLLEAHWTKSAENRIMMHKVYIFLIFMVLILPSLGLT  
SLDFFFRWLQG---  
PVRLECVFLPDQGAFFVNYVIASAFVGNMELMRLPGLILYTIRMIRNIQNQAFEYEFGAMYAW  
MLCVFTVVMAYSITCPIIVPFGLIYLLLKHMVDRHNLYYAYLPT-  
KLDKKIHFSAVRQALTAPILCLMWLFFYSLLRMGFTAPSTLFTLIILLITILICLLYTCFGFFRHLNPY  
YK-----VQEQQTY---  
>Yarrowia\_lipolytica\_XP\_502505.1  
LAGMSIQTFSSLVVAIVIFGIQLAIFILI--RPRIKKLYEPRTL---  
PPELRVSSGLIDWLTATVRYDIEDVVDVDRGGGLDSYFFLRFMRMLLWIFGVACCIIIPILVPINATGN  
TADMPTGMDNLSWSNIPYKSSRYSAHLVMAIATVIVLLALFTYELNVYIEKRHRHRYLTKPSHQIRA  
TATTILIKYVPAHLRSEKAIKNLFRNGDVKNVWFTRDYSKLTSLLSLQKKRYRQLECLVTKRIKS  
EESIRSP--LGTKHDSIEWHCEEIERLTKEIAALKSET-

QFETMPTCMIQFNTQLDAHVACQSLSYHNP-  
NFM DTRIETDHRDVIWANMRGSFYEEKVRF AIATALNLALIIGWAIPVSVVGLISQISYLTQLLPFL  
SFLNDLPAIKGAISGILPPLLLALLMMLVPPILTLLAYLKGISTGIRVQLDVQKYYYAFQYIQLFLVIT  
VSSGLTTTVQQIVDPTSTPTILANNLPKAAFFMSYLILQGMITSMNNMLRVDELIFHLLARIKFS  
LSSISEVIWGNTPFTYTNLATIGIISPIILIFCLISFSLTYMAFKYRIICNVNRVNSYGLFFPTAIF  
QLFTGIYTLQLCLIGLFFLVKCTKHAIIMIIVLAFTILYQLHLSSKLKAVIEYLPVDKAATDADNREKL  
LNRAFLHE

>Yarrowia\_lipolytica\_XP\_505246.1

TQDTSVSNMVTTLISNGVTLGVFFIAFLIL--RPKFKRIYQPRSFLPTE-  
RERTEPVSPVSWLMQLWHKKDSRILEEAGLDGYFFLR YIRLSFIIVVVGIVLLYPILLPVNATGKG-  
-D-GGLNLLGFTNI---

SNRFYAHVLLGWIFFGFCLFMIYREFVYFISIRQAVLTSPAYSTRLSSRVVLTSLPEDYQDETEL  
RKLf--

RGVHTVYVSRNFKKIEKKVAEREKLAGKLEGAENKMIKMAIKKRPTHRLIGEKVDTINYARTEVG  
KLNREIEDMQAHL DQNDKLN SAFVLFNTQEDAQVAYQLLAHKA-  
LHAAPRTGISPDEVIW SNLRVKWWERVTKAMVVKAFALTALIVLWAI PVAVVGSF SNIKSLTGLVP  
FLDFLNLPQLQGLVSGLLPTILMAVLMMLLPIIRQC AKQAGCPTTTRVEYTTQ NAYFAFQFVN  
VFLITTFASSAAATVKAIKDNPGSVMTMLSGNLPKSSNFFVSYIMLQALSFPGGALLQIVALILFKL  
LGTMTWYNILGSTSWGT VFP MYTFLIVVSIAYACVSP IILVFSAVGFALIYLVFLNNLVYCEVPA-  
DGRGIYYSRALRQTMLGIYFGQIFMLALFIMAKSWGPLALQVIFLVFTCFHKTMLKAFNPL LDA  
VPINLMRECAPLTIEQEKA AFLHP

>Yarrowia\_lipolytica\_XP\_505733.1

DLWKHSSLLKTQLLIAGSLGMTAFLSFCVLRKNWPQ--IYAARTR-----  
NTYFGWIPALYKITEEEVLEHCGLDCYVFLQFFKMAIIFALCTFFAVTVIGPIRRNYDNGDELTSF  
GVTTYRASEDYQPYLWTVYFFTYVFTGIVSFFLMRYTQKVIRVRQRYLGAQ---  
NSITDRITIRLSGIPTELRDENRLTEHIEKGDVRSITICREW GELDQLFVVRKEI IKKLEVYQLGSRT  
HS-YDRPTVRIYGTKVDAIDYYTGQLD TLDQKI KARHK--  
EYTPTNTAFVTMDSVASAQMVAQAVLDPSP-  
YHLIAKLAPAPHDIWKNIYMSTMKREVRTYAVTIAIGFLTVALVPPVLGVAKLMDTKTISKSWPAL  
GQLLKDTWLEKLV TGILPPYLF TILNFALPYFYVY LASLQGFISHGDEELSVISKNFFYIFVNLFLIF  
TVAGAAIDIFQYLKDT-

TSIAYKLASSLKKWALFYVDLIVLQGIGMFPFRLL EFGNLLRFGFEKPF RSLYTPPVFNFGNLNPQ  
PILILITLLYSVMSSKILAAGTAYFVLGYFTYKYL LMYAMVHPSHSTGQAWPMIVRRVCVGLVLF  
HATMSGILALQQAYY LATLLAPL PVCAMLLLYNFENNYQPLTQFIALQAIRD TTLDEARERFLTYN  
NP

>Zea\_mays\_B0FSL2

---DLTSFITSVLTSFVIFVALVLLFTWLSRRPGNAPVYYPNLLLRG-----  
RSPVGWLRDAISASEPDVVAAGGVDAAVYLVFLSSVLSILVYSGIVLLPVLLPVAATGGALSTFS  
SIERLGMGNVPEKSMRLWAFLLSVYVVSFVTVFLWKS YKHVSNLRATARSAPD--  
VKPEEF AVLVRDIPRDETIKDSVDSYFRANTFYRSMV VTDHTKADKIYQEIEGHKQKIARAEVVY  
ANSKTGTRPHTRTIGTKVDTIEYCSEIQIKELLPKLEAEQKTTLKQ--

QRAAIVVFNRSAAAFASQTLHAQVY-  
DKWTVMEAPEPRQIIWSNLPRKLYDRQIRQCVVY CIVFLIVVFIYVPLTAIAAVTTLENLEAKLPFL  
KPVVEQPAIKTVLEAYLPQIALIVFLALLPTLLMFLSKQEGIP SQGHAVRAASGKYFYFIVFNVFLC  
YTLGSTLFKSLTTIINH PAEIVNMLAKSLPGSATFFLTFVALKFLVGYGLELSRLVPLIIFHLKRKVR  
AAWAPVDLGYNTRVPNDMLIATVVL CYSVIAPLIIPFGVAYFALGWLIARNQILRVVYVPSYESYGR  
MWPMMHTRIIAALMVYQTTMIGFISLKKFAYA-  
SVLVPLL PASIIFAYVCHMRFYPAFAKT PLEVVRH-----AIYTAYIPP

>Zea\_mays\_B6SS81

---ASLGDIGLAAGLNVLTAVAFLLAF AFLRLQPINDRVYFPKWYLRG--  
MRDNPILKFLNWMPAALKMPQDELINHAGLDSVYLR IYVTGLKIFVPITVLAFLVLVPVNWTND



\_O94886:0.005323999999999884,Pongo\_abelii\_Q5R826:0.0030599999999996186):0.025873  
999999999953,(Mus\_musculus\_Q91YT8:0.005304999999999893,Rattus\_norvegicus\_D4A2I3:  
0.02367800000000031):0.052952999999999584):0.014763000000000304):0.01119700000000  
0124):0.020054999999999712):0.11130500000000021):0.04368499999999974):0.125216999  
9999997):0.1257100000000002):0.112927,((Danio\_rerio\_B0R175:0.16114800000000003,(Xeno  
pus\_tropicalis\_A0JP96:0.20939200000000024,'Anolis\_carolinensis\_XP\_003214481.1':0.13942  
600000000027):0.03862299999999985):0.09533999999999976,(Homo\_sapiens\_B2RN22:0.07  
28139999999971,(Ailuropoda\_melanoleuca\_D2HUR2:0.077626000000000042,(Mus\_musculus  
\_Q8CBX0:0.02686499999999917,Rattus\_norvegicus\_D3ZNF5:0.04492900000000022):0.080  
6200000000014):0.02769499999999958):0.40037199999999995):0.19653900000000046):0.3  
4020399999999995):0.188936):0.25408399999999975,(((Cryptococcus\_neoformans\_XP\_568  
344.1':0.8189649999999999,'Ustilago\_maydis\_XP\_758942.1':0.7183229999999998):0.812952  
0000000001,(((Schizosaccharomyces\_pombe\_NP\_595232.1':0.94714000000000001,(Phaeosp  
haeria\_nodorum\_Q0UJ62:0.387869000000000024,(((Ajellomyces\_capsulata\_A6QRK6:0.189128  
00000000018,Coccidioides\_posadasii\_C5P9N8:0.24959800000000002):0.06021199999999993,  
(Penicillium\_marneffeii\_B6Q4A7:0.28584699999999996,Aspergillus\_niger\_A2QDK9:0.2275209  
9999999986):0.05364399999999998):0.17828100000000013,(Botryotinia\_fuckeliana\_A6RVV4:0  
.274737,'Neurospora\_crassa\_XP\_962104.2':0.31084399999999999):0.11922699999999997):0.0  
5796599999999996):0.31212999999999998):0.212558000000000002,('Cryptococcus\_neoforman  
s\_XP\_569106.1':1.398155,('Ustilago\_maydis\_XP\_760031.1':0.559898,('Cryptococcus\_neoform  
ans\_XP\_568337.1':0.55534900000000001,(Coprinopsis\_cinerea\_A8N733:0.15096100000000001  
2,Laccaria\_bicolor\_B0D8L9:0.116032000000000014):0.249928999999999985):0.1578219999999  
999):0.11233899999999997):0.26566700000000001):0.568457,(((Ustilago\_maydis\_XP\_759473  
.1':0.44886999999999999,('Cryptococcus\_neoformans\_XP\_570388.1':0.446983000000000035,La  
ccaria\_bicolor\_B0DWN0:0.280369000000000003):0.145939999999999951):0.46844400000000003,  
(Schizosaccharomyces\_pombe\_non\_NP\_593089.1':0.793346000000000001,('Neurospora\_crass  
a\_XP\_964945.1':0.62339699999999998,('Yarrowia\_lipolytica\_XP\_505733.1':0.361526,('Sacchar  
omyces\_cerevisiae\_NP\_013342.1':0.44326199999999998,(Clavispora\_lusitaniae\_C4Y5W1:0.21  
518499999999996,(Candida\_albicans\_Q59MD1:0.211030000000000005,Pichia\_stipitis\_A3LQH  
6:0.216231000000000006):0.081029000000000002):0.47512700000000001):0.087323000000000  
04):0.18193899999999985):0.228247000000000053):0.31189099999999997):0.29858500000000  
01,(((Ustilago\_maydis\_XP\_758658.1':0.4999780000000000003,('Cryptococcus\_neoformans\_XP  
\_569104.1':0.615978000000000001,('Cryptococcus\_neoformans\_XP\_568746.1':0.784094000000  
0001,Coprinopsis\_cinerea\_A8N6F5:0.596543):0.168258999999999994):0.092874999999999982)  
:0.2020880000000000027,(((Penicillium\_marneffeii\_B6Q5Z5:0.191972999999999995,(Aspergillus  
\_niger\_A2R3B1:0.1998630000000000012,(Ajellomyces\_capsulata\_A6QU75:0.0979359999999999  
8,Coccidioides\_posadasii\_C5PI64:0.121672999999999992):0.121574999999999999):0.06886800  
000000015):0.121234999999999998,((Botryotinia\_fuckeliana\_A6RS77:0.202799999999999987,  
'Neurospora\_crassa\_XP\_962626.1':0.305725999999999994):0.112689000000000004,('Neurospor  
a\_crassa\_XP\_956097.1':0.56541,(Ajellomyces\_capsulata\_C0NQE5:0.233522999999999993,(As  
pergillus\_niger\_A2R6X5:0.173055000000000018,Penicillium\_marneffeii\_B6QPV3:0.2118500000  
000001):0.115425000000000011):0.146503000000000005):0.092195999999999994):0.091879000  
00000004):0.042901000000000008,(Phaeosphaeria\_nodorum\_Q0V4S6:0.797269,Phaeosphaeri  
a\_nodorum\_Q0UR74:0.53723100000000002):0.116699000000000011):0.162545000000000016,('  
Yarrowia\_lipolytica\_XP\_505246.1':0.489462000000000006,('Saccharomyces\_cerevisiae\_NP\_0  
13993.1':0.343913999999999983,(Debaryomyces\_hansenii\_Q6BLR7:0.213244,(Clavispora\_lusit  
aniae\_C4YBD3:0.250359,(Pichia\_stipitis\_A3LQ78:0.167539000000000001,Candida\_albicans\_Q5  
APG0:0.274283000000000005):0.039166999999999995):0.043174000000000046):0.150935000  
00000004):0.226436999999999978,('Schizosaccharomyces\_pombe\_NP\_592939.1':0.35573999  
999999995,('Saccharomyces\_cerevisiae\_NP\_014557.1':0.469310000000000001,(Clavispora\_lusit  
aniae\_C4XX35:0.246722000000000001,((Debaryomyces\_hansenii\_B5RSZ8:0.07981799999999999

94,Debaryomyces\_hansenii\_Q6BWA0:0.060490000000000155):0.180860000000000002,(Pichia\_stipitidis\_A3LTU0:0.21576299999999993,Candida\_albicans\_C4YKA8:0.31011500000000014):0.041281999999999982):0.04368000000000016):0.17789000000000001):0.05542600000000002):0.296505999999999994):0.06593900000000019):0.11060200000000009):0.27402300000000001,(Neurospora\_crassa\_XP\_962529.1':0.602638999999999999,('Yarrowia\_lipolytica\_XP\_502505.1':0.58008000000000002,('Saccharomyces\_cerevisiae\_NP\_013096.1':1.24589599999999997,(Candida\_albicans\_Q59TM5:0.403537000000000003,Clavisporea\_lusitaniae\_C4XXZ0:0.6174430000000002):0.39376999999999995):0.322001999999999999):0.187946000000000017):0.16497200000000012):0.12365700000000013):0.48781699999999997,'Encephalitozoon\_cuniculi\_NP\_585973.1':1.835811):0.048653999999999975,(Dictyostelium\_discoideum\_Q54RR3:1.35665399999999998,((Phaeodactylum\_tricornutum\_B7G8J8:1.159182,(Perkinsus\_marinus\_C5KLG9:0.25924799999999999,Perkinsus\_marinus\_C5KY51:0.314941999999999983):0.89728200000000001):0.271045,(Monosiga\_brevicollis\_A9UQI6:1.13686099999999997,(((('Ostreococcus\_lucimarinus\_XP\_001417492.1':0.12796699999999994,Ostreococcus\_tauri\_Q01B23:0.212005):0.606668,('Micromonas\_SP\_XP\_002501858.1':0.336926999999999975,'Micromonas\_pusilla\_XP\_003057675.1':0.51253100000000001):0.19509499999999998):1.26212099999999996,(((('Chlorella\_variabilis\_EFN54682.1':0.80905400000000002,('Volvox\_carteri\_XP\_002949162.1':0.74521000000000002,('Micromonas\_pusilla\_XP\_003059254.1':0.280577999999999977,'Micromonas\_SP\_XP\_002502566.1':0.32805000000000002):0.84650399999999999):0.107222999999999985):0.085945999999999986,('Chlorella\_variabilis\_EFN53692.1':0.252603000000000013,'Chlorella\_variabilis\_EFN57874.1':0.319659999999999983):0.55149899999999997,('Volvox\_carteri\_XP\_002948882.1':0.579895,('Chlamydomonas\_reinhardtii\_XP\_001698593.1':0.49194199999999999,'Chlamydomonas\_reinhardtii\_XP\_001699584.1':0.398037):0.26726200000000001):0.300841000000000014):0.27912999999999999):0.10408999999999998,('Ostreococcus\_lucimarinus\_XP\_001416012.1':0.699004,('Ostreococcus\_lucimarinus\_XP\_001421858.1':0.136212,'Ostreococcus\_tauri\_XP\_003083863.1':0.18510299999999998):0.466635000000000013):0.50117799999999999):0.493468):0.176178000000000017,(((('Chlorella\_variabilis\_EFN53534.1':0.67611499999999998,(((('Chlamydomonas\_reinhardtii\_XP\_001695096.1':0.132680999999999983,'Chlamydomonas\_reinhardtii\_XP\_001702328.1':0.157703999999999984):0.11907399999999999,('Volvox\_carteri\_XP\_002955034.1':0.172521999999999984,('Chlamydomonas\_reinhardtii\_XP\_001702312.1':0.35613599999999998,'Chlamydomonas\_reinhardtii\_XP\_001702326.1':0.165928999999999977):0.09220199999999999):0.05561199999999995):0.421155000000000017,('Volvox\_carteri\_XP\_002951035.1':0.53758399999999998,'Chlamydomonas\_reinhardtii\_XP\_001699063.1':2.294195):0.291414000000000006):0.17235300000000002):0.47954199999999999,(((('Physcomitrella\_patens\_A9RYA3:0.33724199999999998,(Physcomitrella\_patens\_A9SW54:0.283930999999999993,Physcomitrella\_patens\_A9RU79:0.31966699999999999):0.19318200000000002):0.19092099999999999,(((('Physcomitrella\_patens\_XP\_001768825.1':0.51697999999999998,(Physcomitrella\_patens\_A9RK07:0.124193,Physcomitrella\_patens\_A9TU69:0.09490599999999993):0.191873000000000018):0.128943000000000003,((Selaginella\_moellendorffii\_D8RE49:0.363440999999999999,Selaginella\_moellendorffii\_D8RRD4:0.22763700000000001):0.062771999999999983,(((('Sorghum\_bicolor\_C5WQN2:0.0590299999999999916,(Oryza\_sativa\_indica\_A2ZAL4:0.0,Oryza\_sativa\_japonica\_Q7XBT3:0.00152399999999998588):0.0429960000000000034):0.125144000000000014,((('Arabidopsis\_lyrata\_D7KHF7:0.0076480000000000099,Arabidopsis\_thaliana\_Q9FVQ5:0.00442799999999998765):0.143184000000000002,(Vitis\_vinifera\_D7SYN5:0.087734999999999999,(Populus\_trichocarpa\_B9MUA6:0.064007000000000015,Ricinus\_communis\_B9S1E8:0.070676999999999988):0.030864999999999992):0.02369799999999997):0.07409499999999998):0.132178999999999982,(((('Sorghum\_bicolor\_C5YY97:0.072054000000000006,(Oryza\_sativa\_indica\_A2Y4C8:0.0,Oryza\_sativa\_japonica\_Q6AU79:0.0):0.062107999999999983):0.17069,(Ricinus\_communis\_B9T4A8:0.146703000000000003,(Vitis\_vinifera\_D7TPC6:0.132626000000000013,(Arabidopsis\_lyrata\_D7M3B8:0.0065019999999999786,Arabidopsis\_thaliana\_Q9SY14:0.0041400000000000325):0.16752099999999998):0.0208889999999999935):0.0283039999999999885):0.064982999999999979,(((('Sorghum\_bicolor\_C5XMV4:0.050453999



99999978,(Oryza\_sativa\_indica\_B8A9P0:0.0,Oryza\_sativa\_japonica\_Q5JLH8:0.0):0.04342699  
99999988):0.0466489999999994,((Oryza\_sativa\_indica\_A2Y857:0.0,Oryza\_sativa\_japonica  
\_Q5TKG1:0.0):0.08363299999999985,(Sorghum\_bicolor\_C5YX25:0.01187899999999973,Ze  
a\_mays\_B6SS81:0.03278900000000018):0.06606500000000004):0.05584699999999998):0.1  
149659999999999,(((Arabidopsis\_lyrata\_D7MAI0:0.009754000000000004,Arabidopsis\_thaliana  
\_Q8VZM5:0.00236899999999998435):0.150577999999999988,(Arabidopsis\_lyrata\_D7L0U9:0.00  
40710000000000158,Arabidopsis\_thaliana\_Q9LVE4:0.0141160000000000017):0.063493999999  
99994):0.115130000000000018,(Lotus\_japonicus\_B0BLA8:0.111104999999999979,(Vitis\_vinifer  
a\_D7TEB7:0.123421,(Ricinus\_communis\_B9STM2:0.064753000000000006,(Populus\_trichocarp  
a\_B9GTV5:0.03928099999999999,Populus\_trichocarpa\_B9IAI0:0.0268470000000000065):0.036  
93599999999986):0.02147599999999983):0.0140970000000000026):0.01563099999999995):0.  
036931000000000005,(Vitis\_vinifera\_E0CVN9:0.10813499999999987,((Ricinus\_communis\_B9  
RXG3:0.054964000000000001,(Populus\_trichocarpa\_B9N8E6:0.10251799999999989,(Populus  
\_trichocarpa\_B9HZA2:0.046791999999999945,(Populus\_trichocarpa\_B9N8E7:0.00888400000  
0000114,Populus\_trichocarpa\_B9NGP9:0.032471000000000014):0.031848000000000001):0.0262  
2599999999986):0.05122699999999991):0.028620999999999786,(((Arabidopsis\_lyrata\_D7ME  
79:0.00739100000000001475,Arabidopsis\_thaliana\_Q5XEZ5:0.013746999999999954):0.04564  
7000000000215,(Arabidopsis\_lyrata\_D7M169:0.018117999999999856,Arabidopsis\_thaliana\_Q  
9XEA1:0.0254020000000000147):0.06345199999999984):0.089188000000000005,((Arabidopsis  
\_lyrata\_D7KN76:0.009120999999999935,Arabidopsis\_thaliana\_B5TYT3:0.02499900000000002  
15):0.06790399999999996,(Arabidopsis\_lyrata\_D7KUS0:0.010053999999999785,Arabidopsis\_  
thaliana\_Q9MAV5:0.0162100000000000058):0.080868999999999986):0.10727099999999999):0.0  
201270000000000006):0.021240999999999843):0.0404840000000000187):0.034888000000000  
03):0.0289290000000000205):0.10151399999999988):0.10530099999999987):0.068570999999  
99994):0.109957000000000008):0.23944199999999993,((Physcomitrella\_patens\_A9SDM0:0.36  
9421,Physcomitrella\_patens\_A9SH39:0.31093299999999999):0.16760000000000002,((Selaginell  
a\_moellendorffii\_D8QPN8:0.0017000000000000348,Selaginella\_moellendorffii\_D8SKT7:0.005  
954000000000015):0.367372000000000003,(((Sorghum\_bicolor\_C5XHW4:0.0933250000000000  
1,(Oryza\_sativa\_indica\_B8A969:0.002705999999999875,Oryza\_sativa\_japonica\_Q5JKX1:0.00  
5494999999999806):0.087587000000000008):0.2789989999999998,((Arabidopsis\_lyrata\_D7LU  
U6:0.012157999999999891,Arabidopsis\_thaliana\_Q9M1H6:0.011695000000000011):0.205859  
9999999993,(Populus\_trichocarpa\_B9GWL7:0.12127899999999991,Ricinus\_communis\_B9R  
GD1:0.15402899999999997):0.084400000000000003):0.14245000000000002):0.5077919999999  
998,(((Oryza\_sativa\_indica\_B8AP47:0.0,Oryza\_sativa\_japonica\_Q75LY2:0.0):0.14147199999  
99982,(Sorghum\_bicolor\_C5YSZ5:0.06470799999999999,(Oryza\_sativa\_indica\_B8ACM4:0.0,  
Oryza\_sativa\_japonica\_Q2QLP9:0.0):0.056545999999999985):0.04890699999999981):0.1745  
5700000000007,((Oryza\_sativa\_indica\_B8AR42:1.000000000139778E-  
6,Oryza\_sativa\_japonica\_Q75GI5:0.007770999999999972):0.375684000000000013,(((Arabidop  
sis\_lyrata\_D7KKL9:0.02298499999999981,Arabidopsis\_thaliana\_Q94A87:0.038428999999999  
824):0.13535699999999995,(Arabidopsis\_lyrata\_D7KXW9:0.006388999999999978,'Arabidopsi  
s\_thaliana\_NP\_683440.2':0.010993000000000003):0.06579099999999993):0.20682700000000  
01,(Vitis\_vinifera\_E0CNX2:0.18550099999999992,(Populus\_trichocarpa\_B9GNK6:0.152393,Ri  
cinus\_communis\_B9R6U4:0.10605799999999999):0.094158999999999988):0.02657599999999  
9933):0.083669):0.046086999999999999):0.28186599999999995,(Picea\_sitchensis\_B8LKM0:0.  
20858,((Ricinus\_communis\_B9S919:0.10118099999999997,(Arabidopsis\_lyrata\_D7KX16:0.00  
7998999999999867,Arabidopsis\_thaliana\_Q9C792:0.0300940000000000065):0.3498570000000  
001):0.106392000000000004,(Medicago\_truncatula\_A2Q3S2:0.255358000000000002,(Arabidopsi  
s\_thaliana\_Q8GUH7:0.269274000000000024,(Populus\_trichocarpa\_B9H0G3:0.1223610000000  
0016,Ricinus\_communis\_B9SVJ7:0.141627999999999987):0.050807999999999964):0.0372859  
9999999993):0.07015299999999991):0.220073999999999988):0.093830000000000008):0.27005  
4):0.078012000000000019):0.086043999999999979):0.42337600000000002):0.200529999999999

65,(((Physcomitrella\_patens\_A9SJW4:0.109961999999999999,(Physcomitrella\_patens\_A9RIT4:0.06116499999999999914,Physcomitrella\_patens\_A9SK54:0.075612000000000001):0.089112999999999978):0.281498,((Physcomitrella\_patens\_A9S3X9:0.154183000000000018,Physcomitrella\_patens\_A9TEC4:0.104401000000000019):0.151283999999999997,(Physcomitrella\_patens\_A9S768:0.204540000000000017,Physcomitrella\_patens\_A9SW37:0.156325999999999996):0.20129999999999998):0.105059999999999993):0.116883000000000007,(Selaginella\_moellendorffii\_XP\_002990725:0.507989000000000002,(((Oryza\_sativa\_indica\_A2YI72:0.0,Oryza\_sativa\_japonica\_Q6ZLQ0:0.00151099999999999818):0.081367000000000019,(Sorghum\_bicolor\_C5X9J3:0.039251000000000015,Zea\_mays\_B0FSL2:0.0460759999999999784):0.070110000000000012):0.19869899999999996,(Populus\_trichocarpa\_B9GJG0:0.145021999999999998,((Arabidopsis\_lyrata\_D7KET4:0.0215589999999999884,Arabidopsis\_thaliana\_Q9C8G5:0.0120309999999999903):0.081172000000000002,(Brassica\_campestris\_A8IXK5:0.039413000000000014,Brassica\_juncea\_A9LIW2:0.042645999999999996):0.075506999999999999):0.181814999999999984):0.110918999999999999):0.183593000000000012):0.073945000000000015):0.502342999999999998):0.154040000000000018):0.106146999999999999):0.096184000000000005):0.125955999999999996):0.0467809999999999974):0.076074000000000002):0.128382999999999999):0.121882999999999996):0.203437000000000001):0.4872870000000000025,(Selaginella\_moellendorffii\_D8S958:0.340412999999999985,(((Arabidopsis\_lyrata\_D7MBR9:0.0,Arabidopsis\_thaliana\_Q9SZT4:0.0064440000000000116):0.129190999999999996,(Ricinus\_communis\_B9T723:0.05007500000000000536,(Populus\_trichocarpa\_B9HH28:0.0593010000000000049,Populus\_trichocarpa\_B9MXB5:0.0402750000000000028):0.055352000000000007):0.0466309999999999645):0.1116230000000000025,((Sorghum\_bicolor\_Q1KSB7:0.00475300000000000007,Zea\_mays\_C0PEC9:0.0099859999999999606):0.0364230000000000094,(Oryza\_sativa\_indica\_B8AMU4:0.0,Oryza\_sativa\_japonica\_Q10S28:0.0016270000000000045):0.031460999999999974):0.2140530000000000027):0.219272999999999983):1.236678000000000004):0.2540839999999999975);

## References

1. Liu, K. & Luan, S. Internal aluminum block of plant inward K(+) channels. *The Plant Cell* **13**, 1453–1465 (2001).
2. Liedtke, W. *et al.* Vanilloid receptor-related osmotically activated channel (VR-OAC), a candidate vertebrate osmoreceptor. *Cell* **103**, 525–535 (2000).
3. Katoh, K. *et al.* MAFFT: a novel method for rapid multiple sequence alignment based on fast Fourier transform. *Nucleic Acids Research* **30**, 3059–3066 (2002).
4. Guindon, S. *et al.* New Algorithms and Methods to Estimate Maximum-Likelihood Phylogenies: Assessing the Performance of PhyML 3.0. *Systematic Biology* **59**, 307–321 (2010).
5. Anisimova, M. & Gascuel, O. Approximate Likelihood-Ratio Test for Branches: A Fast, Accurate, and Powerful Alternative. *Systematic Biology* **55**, 539–552 (2006).
6. Klammer, M., Messina, D. N., Schmitt, T. & Sonnhammer, E. L. L. MetaTM - a consensus method for transmembrane protein topology prediction. *BMC Bioinformatics* **10**, 314 (2009).
